# Supplementary material for: Comparative thromboembolic risk in atrial fibrillation with and without a secondary precipitant—Danish nationwide cohort study
Source: PubMed Central journal article supplement — BMJ Open. 2019 Sep 20;9(9):e028468. doi: 10.1136/bmjopen-2018-028468 (PMC6756362; doi:10.1136/bmjopen-2018-028468), 2019-09-20
Supplement: bmjopen-2018-028468.draft_revisions.pdf [file bmjopen-2018-028468.draft_revisions.pdf]

# BMJ Open

BMJ Open is committed to open peer review. As part of this commitment we make the peer review history of every article we publish publicly available.

When an article is published we post the peer reviewers' comments and the authors' responses online. We also post the versions of the paper that were used during peer review. These are the versions that the peer review comments apply to.

The versions of the paper that follow are the versions that were submitted during the peer review process. They are not the versions of record or the final published versions. They should not be cited or distributed as the published version of this manuscript.

BMJ Open is an open access journal and the full, final, typeset and author-corrected version of record of the manuscript is available on our site with no access controls, subscription charges or pay-per-view fees (<http://bmjopen.bmj.com>).

If you have any questions on BMJ Open's open peer review process please email [info.bmjopen@bmj.com](mailto:info.bmjopen@bmj.com)

# BMJ Open

## Comparative thromboembolic risk in secondary and primary atrial fibrillation in a nationwide cohort

|                               |                                                                                                                                                                                                                                                                                                                                                                                                                                                                                                                                                                                                                                             |
|-------------------------------|---------------------------------------------------------------------------------------------------------------------------------------------------------------------------------------------------------------------------------------------------------------------------------------------------------------------------------------------------------------------------------------------------------------------------------------------------------------------------------------------------------------------------------------------------------------------------------------------------------------------------------------------|
| Journal:                      | <i>BMJ Open</i>                                                                                                                                                                                                                                                                                                                                                                                                                                                                                                                                                                                                                             |
| Manuscript ID                 | bmjopen-2018-028468                                                                                                                                                                                                                                                                                                                                                                                                                                                                                                                                                                                                                         |
| Article Type:                 | Research                                                                                                                                                                                                                                                                                                                                                                                                                                                                                                                                                                                                                                    |
| Date Submitted by the Author: | 10-Dec-2018                                                                                                                                                                                                                                                                                                                                                                                                                                                                                                                                                                                                                                 |
| Complete List of Authors:     | Gundlund, A; Herlev and Gentofte Hospital, Kümler, Thomas; Herlev and Gentofte Hospital<br>Bonde, Anders; Herlev and Gentofte Hospital<br>Butt, Jawad; Rigshospitalet, Department of Cardiology<br>Gislason, Gunnar; Herlev and Gentofte Hospital<br>Torp-Pedersen, Christian; Aalborg University, Department of Health Science and Technology; Aalborg University Hospital , Department of Clinical Epidemiology<br>Køber, Lars; Rigshospitalet, Department of Cardiology - The Heart Centre<br>Olesen, Jonas; Copenhagen University Hospital Gentofte, Department of Cardiology<br>Fosbøl, Emil; Rigshospitalet, Department of Cardiology |
| Keywords:                     | Cardiac Epidemiology < CARDIOLOGY, Thromboembolism < CARDIOLOGY, Pacing & electrophysiology < CARDIOLOGY                                                                                                                                                                                                                                                                                                                                                                                                                                                                                                                                    |
|                               |                                                                                                                                                                                                                                                                                                                                                                                                                                                                                                                                                                                                                                             |

SCHOLARONE™  
Manuscripts

1  
2  
3  
4 1 **Comparative thromboembolic risk in secondary and primary atrial fibrillation**  
5  
6  
7 2 **in a nationwide cohort**  
8

9 3 Anna Gundlund<sup>1</sup>, MD, PhD; Thomas Kümler<sup>2</sup>, MD, PhD; Anders Nissen Bonde<sup>1</sup>, MD; Jawad H.  
10 4 Butt, MD<sup>6</sup>; Gunnar H. Gislason<sup>1,3,4</sup>, MD, PhD; Christian Torp-Pedersen<sup>5</sup>, MD, DMSc; Lars Køber<sup>6</sup>,  
11 5 MD, DMSc; Jonas Bjerring Olesen<sup>1</sup>, MD, PhD; Emil Loldrup Fosbøl<sup>6</sup>, MD, PhD  
12  
13  
14  
15  
16  
17  
18

19 7 **Institution**

20  
21 8 Department of Cardiology, Research Unit 1, Copenhagen University Hospital Herlev-Gentofte,  
22 9 Kildegaardsvej 28, 2900 Hellerup, Denmark  
23  
24  
25  
26  
27  
28

29 11 **Affiliations**

30 12 1: Department of Cardiology, Research Unit 1, Copenhagen University Hospital Herlev-Gentofte,  
31 13 Hellerup, Denmark  
32  
33  
34

35 14 2: Department of Cardiology, Copenhagen University Hospital Herlev-Gentofte, Herlev, Denmark  
36

37 15 3: The Danish Heart Foundation, Copenhagen, Denmark  
38

39 16 4: The National Institute of Public Health, University of Southern Denmark  
40

41 17 5: Department of Health, Science and Technology, Aalborg University and departments of  
42 18 Cardiology and Epidemiology/Biostatistics, Aalborg University Hospital, Denmark  
43  
44

45 19 6: Department of Cardiology, University Hospital of Copenhagen, Rigshospitalet  
46  
47  
48  
49  
50  
51

52 21 **Corresponding author:**

53 22 Anna Gundlund, MD, PhD  
54

55 23 Department of Cardiology, Research Unit 1, Copenhagen University Hospital Herlev-Gentofte,  
56 24 Hellerup, Denmark, Post 635  
57  
58  
59  
60

1  
2  
3  
4 1 Tel: 0045 50907119  
5

6 2 FAX: 38677642  
7

8  
9 3 Email: annagundlund@gmail.com  
10  
11  
12  
13  
14  
15  
16  
17  
18  
19  
20  
21  
22  
23  
24  
25  
26  
27  
28  
29  
30  
31  
32  
33  
34  
35  
36  
37  
38  
39  
40  
41  
42  
43  
44  
45  
46  
47  
48  
49  
50  
51  
52  
53  
54  
55  
56  
57  
58  
59  
60

For peer review only

1  
2  
3  
4 1 **Abstract:** 263 words (max 300 words)  
5

6 2 Objectives: We studied long-term outcomes in patients with different subtypes of secondary AF and  
7  
8 compared them with primary AF.  
9

10 3  
11 4 Design and setting: Retrospective cohort study based on Danish nationwide registries.  
12

13 5 Participants: All Danish residents admitted with AF for the first time from 1996-2015. Patients with  
14  
15 secondary AF (AF with a concurrent precipitant) and patients with primary AF (AF without a  
16  
17 precipitant) were matched 1:1 according to age, sex, calendar year, CHA<sub>2</sub>DS<sub>2</sub>-VASc score, and  
18  
19 OAC therapy status at the index date (4 weeks after discharge) resulting in a cohort of 39,723  
20  
21 patients with secondary AF and the same number of patients with primary AF. Secondary  
22  
23 precipitants included alcohol intoxication, thyrotoxicosis, myocardial infarction, surgery, and  
24  
25 infection in conjunction with AF.  
26  
27  
28

29 12 Primary and secondary outcomes: The primary outcome in this study was thromboembolic events.  
30  
31 Secondary outcomes included AF re-hospitalization and death. Long-term risks of outcomes were  
32  
33 examined by multivariable Cox regression analysis.  
34  
35

36 15 Results: The most common precipitants were infection (55.0%), surgery (13.2%), and myocardial  
37  
38 infarction (12.0%). Among those initiated on OAC therapy as well as those not initiated on OAC  
39  
40 therapy, secondary AF was associated with the same or an even higher thromboembolic risk than  
41  
42 primary AF. One exception was patients with AF secondary to thyrotoxicosis: those not initiated on  
43  
44 OAC therapy carried a lower thromboembolic risk the 1<sup>st</sup> year of follow up than matched patients  
45  
46 with primary AF and no OAC therapy.  
47  
48  
49

50 21 Conclusions: In general, secondary AF was associated with the same thromboembolic risk as  
51  
52 primary AF. Consequently, this study highlights the need for more research regarding the long-term  
53  
54 management of patients with secondary AF.  
55  
56

57 24 Key words: Secondary precipitant, reversible atrial fibrillation, recurrence  
58  
59  
60

1  
2  
3  
4 1 **Article summary: strengths and limitations of this study**  
5

- 6  
7 2     • The study was based on high-quality nationwide registries with many years of follow up.  
8  
9 3     • Complete follow-up was possible  
10  
11 4     • Only associations could be drawn because of the retrospective and non-randomized design.  
12  
13  
14 5     • Secondary and primary AF were defined from diagnosis codes at discharge  
15  
16 6     • We had no data on electrocardiograms at discharge  
17  
18  
19 7

## 1           2           3 4           1    **Introduction**

5  
6           2    Atrial fibrillation (AF) may occur as an isolated event (primary AF) or together with a precipitant  
7  
8           3    (secondary AF). AF is associated with a fivefold increased risk of ischemic stroke, and detailed  
9  
10          4    treatment strategies regarding stroke prophylaxis in patients with primary AF exist in both  
11  
12          5    European and American treatment guidelines.[1–4] In contrast, there is no consensus regarding  
13  
14          6    stroke prophylaxis in patients with secondary AF. Previous guidelines stated that AF occurring  
15  
16          7    secondary to another precipitant usually will terminate without recurrence.[1] In current guidelines,  
17  
18          8    however, this statement has been omitted, and the need for data regarding secondary AF  
19  
20          9    highlighted.[3,4] Studies investigating long-term outcomes in secondary AF are sparse and data  
21  
22          10   differentiating between subtypes of secondary AF and taking oral anticoagulation (OAC) therapy  
23  
24          11   into account are missing.

25  
26          12   To address this lack in current knowledge, we aimed to compare long-term outcomes including  
27  
28          13   thromboembolic events, AF re-hospitalization, and death in patients with AF and a secondary  
29  
30          14   precipitant (incl. alcohol, intoxication, thyrotoxicosis, myocardial infarction, surgery, and infection)  
31  
32          15   and patients with primary AF. Further, we were able to differentiate between patients receiving and  
33  
34          16   not receiving stroke prophylaxis with OAC therapy.

## 35          17 36 37          18   **Materials and methods**

### 38          19    *Data sources*

39  
40          20    In Denmark, healthcare is tax-financed and with equal availability regardless of socioeconomic  
41  
42          21    status. Date of birth, date and cause of death, emigration and immigration status, diagnosis and  
43  
44          22    surgery codes etc. from all hospital contacts, fulfilled prescriptions of medicine, and several other  
45  
46          23    parameters are registered in different nationwide registries. Since all Danish citizens are provided a  
47  
48          24    unique personal identifier code at birth (or immigration), data from the registries can be crosslinked

1  
2  
3  
4 1 on an individual level. We linked data from the following registries: The Danish Civil Registration  
5  
6 2 System,[5] The Danish National Patient Registry (diagnoses were registered in terms of the  
7  
8 3 International Classification of Diseases (ICD) system (ICD-8 until 1994 and in terms of ICD-10  
9  
10 4 thereafter)),[6] The Danish Register of Causes of Death,[7] and the Danish National Registry of  
11  
12 5 Medicinal Statistics (medicine were registered according to the Anatomical Therapeutic Chemical  
13  
14 6 classification system (ATC)).[8]  
15  
16  
17  
18  
19  
20

### 21 8 *Study population*

22  
23 9 The patient selection is depicted in Figure 1. We included all Danes diagnosed and admitted to a  
24  
25 10 hospital with AF for the first time between 1996 and 2015. Patients <18 years or >100 years and  
26  
27 11 those with valvular AF (defined as AF without: rheumatic valve disease of aortic valve or mitral  
28  
29 12 valve or prosthetic heart valve (any valve)) were excluded. Since there was a possibility that some  
30  
31 13 of the patients had been diagnosed with AF at their general practitioner before their hospital  
32  
33 14 admission, we excluded those who previously had fulfilled a prescription of antiarrhythmic therapy  
34  
35 15 or rate-controlling drugs (incl. amiodarone, flecainide, and digoxin) and those who had fulfilled a  
36  
37 16 prescription of OAC therapy up to 100 days before their hospital admission. Further, patients who  
38  
39 17 died or had a thromboembolic event during the hospital admission or a constructed blanking period  
40  
41 18 of 4 weeks from hospital discharge to the index date were excluded.  
42  
43  
44  
45

46 19 Patients were grouped in those with secondary and primary AF, respectively. Patients who had a  
47  
48 20 diagnosis of one of the following precipitants from their AF hospital admission were defined as  
49  
50 21 patients with secondary AF: alcohol intoxication, thyrotoxicosis, myocardial infarction, and  
51  
52 22 infection. Also, patients who were diagnosed with AF after, but during the same hospital admission  
53  
54 23 they received surgery were defined as having secondary AF. Primary AF was defined as AF  
55  
56 24 without a concurrent precipitant. We restricted the primary AF population to patients with AF as the  
57  
58  
59  
60



1  
2  
3  
4  
5  
6  
7  
8  
9  
10  
11  
12  
13  
14  
15  
16  
17  
18  
19  
20  
21  
22  
23  
24  
25  
26  
27  
28  
29  
30  
31  
32  
33  
34  
35  
36  
37  
38  
39  
40  
41  
42  
43  
44  
45  
46  
47  
48  
49  
50  
51  
52  
53  
54  
55  
56  
57  
58  
59  
60

1 primary diagnosis from their hospital admission. Patients with secondary AF were matched 1:1 with  
2 patients with primary AF by incidence density sampling according to age (allowing a difference of  
3 up to two years), sex, calendar year (allowing a difference up to two years), CHA<sub>2</sub>DS<sub>2</sub>-VASc group  
4 (0, 1-2, >2) and OAC therapy status at the index date. These patients comprised the study  
5 population. We used a previously described function to perform the match.[9]

### 7 *Long-term outcomes*

8 The index date was defined 4 weeks from AF hospital discharge. Initiation of OAC therapy and  
9 antiarrhythmic and rate controlling drugs was assessed during this blanking period from discharge  
10 to index date. Patients were followed from the index date and until the first event of the following:  
11 an outcome of interest, death, 5 years from the index date, emigration, or June 30, 2015. The  
12 primary outcome of interest was thromboembolic events (a composite of ischemic stroke, transient  
13 ischemic attack (TIA), and systemic thrombosis or embolism) while secondary outcomes included  
14 AF re-hospitalization and all-cause death. AF-rehospitalization was defined as a hospitalization  
15 with AF as the primary discharge diagnosis. The diagnoses of AF, ischemic stroke, and myocardial  
16 infarction have been validated in the Danish registries with positive predictive values of 93%, 97%,  
17 and 100%, respectively.[10,11]

### 19 *Statistics*

20 Kaplan Meier curves for death were drawn and cumulative incidences of thromboembolic events  
21 (with incorporated competing risk of death) calculated using the Aalen Johansen estimator. The  
22 Log-Rank test and the Gray's test were used to test for differences in the cumulative incidence of  
23 long-term outcomes. Cox regression analyses were performed to calculate hazard ratios (HR) of  
24 long-term outcomes in patients with secondary vs. primary AF according to OAC therapy at the

1  
2  
3  
4 1 index date. The multivariate models were adjusted for comorbidities at the index date (incl.  
5  
6 2 peripheral artery disease, heart failure, hypertension, prior thromboembolic event, ischemic heart  
7  
8  
9 3 disease, chronic kidney disease, diabetes, prior bleeding event, cancer) and antiarrhythmic and rate-  
10  
11 4 controlling therapy during the blanking period (amiodarone, digoxin, flecainide). The analyses took  
12  
13 5 matching variables into account and each secondary AF group was compared with its respective  
14  
15 6 matches from the matching procedure. The models were tested for the assumption of proportional  
16  
17 7 hazards. For specification of diagnosis codes and ATC-codes please see Online Table 1. A P-value  
18  
19 8 <0.05 was considered statistically significant. All statistical analyses were performed in SAS  
20  
21 9 statistical software version 9.4 or R.[12]  
22  
23  
24  
25  
26  
27

### 28 11 *Other analyses*

29  
30 12 Analyses of long-term outcomes were also performed on a non-matched population including all  
31  
32 13 patients available before the matching (Figure 1).  
33  
34  
35  
36

### 37 15 *Ethics*

38  
39 16 Approval from the Research Ethics Committee System is not required in retrospective registry-  
40  
41 17 based studies in Denmark. The Danish Data Protection Agency approved use of data for this study  
42  
43 18 (ret.no: 2007-58-0015 / GEH-2014-013 I-Suite no: 02731).  
44  
45  
46  
47

## 48 20 **Results**

### 49 50 21 *Study population*

51  
52 22 As shown in Figure 1, the most common precipitant was infection (21,824 patients, 55.0%).  
53  
54 23 Further, 335 (0.8%) patients had a concurrent alcohol intoxication, 2507 (6.3%) had thyrotoxicosis,  
55  
56 24 4773 (12.0%) had acute myocardial infarction, 5229 (13.2%) had underwent surgery, and 5055  
57  
58  
59  
60

1  
2  
3  
4  
5  
6  
7  
8  
9  
10  
11  
12  
13  
14  
15  
16  
17  
18  
19  
20  
21  
22  
23  
24  
25  
26  
27  
28  
29  
30  
31  
32  
33  
34  
35  
36  
37  
38  
39  
40  
41  
42  
43  
44  
45  
46  
47  
48  
49  
50  
51  
52  
53  
54  
55  
56  
57  
58  
59  
60

(12.7%) had >1 precipitant. Of those with >1 precipitant, 4788 (94.7%) patients had two secondary precipitants, while 267 (5.3%) had three or four precipitants. Infection and surgery was the most common combination of precipitants. The patients with >1 precipitant were grouped in one group, and were not included in the other groups of patients with secondary AF. During the blanking period, 14% of the patients with secondary AF and 2% of the patients with primary AF died, while 5% and 2%, respectively, had a thromboembolic event. These patients were excluded before the matching.

### *Baseline characteristics*

Baseline characteristics of the matched study population are shown in Table 1. In general, patients with secondary AF had more comorbidities than patients with primary AF. Baseline characteristics of the non-matched population according to OAC therapy at the index date are shown in online Table 2 and 3. Especially those with AF secondary to myocardial infarction, surgery, infection, and >1 precipitant were older, had more comorbidities, and higher risk scores for stroke and bleeding compared with patients with primary AF. Among the patients with secondary AF (non-matched study population), 9.9% with alcohol intoxication, 43.9% with thyrotoxicosis, 27.2% with myocardial infarction, 21.9% with surgery, 27.1% with infection, and 21.4% with >1 precipitant received OAC therapy at the index date, respectively. Among patients with primary AF, 38.5% received OAC therapy at the index date. In general for patients with secondary as well as patients with primary AF, those initiated on OAC therapy suffered from less cancer, chronic kidney disease, peripheral artery disease, and had fewer previous bleeding events than those not initiated on OAC. On the other hand, they were more likely to suffer from stroke risk factors (incl. diabetes, heart failure, ischemic heart disease, and hypertension) than those not initiated on OAC therapy.

1  
2  
3  
4 1 *Long-term outcomes*

5  
6 2 During follow up, the cumulative incidence of thromboembolic events (taking death as an  
7  
8  
9 3 competing risk into account) was 8.3% (alcohol intoxication), 8.5% (thyrotoxicosis), 12.1%  
10  
11 4 (myocardial infarction), 11.6% (surgery), 12.2% (infection), 10.1% (>1 precipitant), and 12.3%  
12  
13 5 (primary AF). Figure 2 depicts cumulative incidences of thromboembolic events and death in  
14  
15 6 patients with secondary vs. primary AF. Number of events, incidence rates, and crude and adjusted  
16  
17 7 hazard ratios (HRs) of thromboembolic events and death in patients with secondary AF compared  
18  
19 8 with patients with primary AF initiated and not initiated on OAC therapy at the index date are  
20  
21 9 presented in Figure 3. With few exceptions, secondary AF was associated with the same  
22  
23 10 thromboembolic risk as primary AF. Regardless of OAC therapy status at the index date, AF  
24  
25 11 secondary to infection was associated with a significantly increased risk of thromboembolic events  
26  
27 12 compared with primary AF. Among those not initiated on OAC therapy, AF secondary to  
28  
29 13 thyrotoxicosis was associated with a significantly lower risk of thromboembolic events compared  
30  
31 14 with primary AF. In those initiated on OAC therapy, no differences in thromboembolic risk was  
32  
33 15 observed between patients with AF secondary to thyrotoxicosis and primary AF.  
34  
35  
36  
37  
38  
39  
40

41 17 OAC therapy initiation compared with no OAC therapy initiation was associated with a lower  
42  
43 18 thromboembolic risk in patients with secondary as well as primary AF, although the results did not  
44  
45 19 reach statistical significance in patients with AF secondary to alcohol intoxication, thyrotoxicosis,  
46  
47 20 myocardial infarction, and surgery (Figure 4). From the index date to end of follow up, the  
48  
49 21 cumulative incidences of AF re-hospitalization (taking death as a competing risk into account) were  
50  
51 22 19.6% (alcohol intoxication), 30.8% (thyrotoxicosis), 27.2% (myocardial infarction), 14.8%  
52  
53 23 (surgery), 20.9% (infection), 19.3% (>1 precipitant), and 34.4% (primary AF). In multivariable  
54  
55 24 Cox regression models the risk of AF re-hospitalizations in patients with secondary vs. primary AF  
56  
57  
58  
59  
60

1  
2  
3  
4 1 were: HR 0.40, 95% confidence interval 0.28-0.58 (alcohol intoxication), HR 0.66, 95% CI 0.59-  
5  
6 2 0.73 (thyrotoxicosis), HR 0.73, 95% CI 0.65-0.82 (myocardial infarction), HR 0.52, 95% CI 0.48-  
7  
8 3 0.57 (surgery), HR 0.61, 95% CI 0.59-0.64 (infection), and HR 0.46, 95% CI 0.42-0.51 (>1  
9  
10 precipitant)).  
11  
12  
13  
14  
15

#### 16 6 *Other analyses*

17  
18 7 The long-term risk of thromboembolic events for patients with secondary vs. primary AF in the  
19  
20 8 non-matched population were comparable to the risks found in the main analysis, except that AF  
21  
22 9 secondary to thyrotoxicosis reached statistical significance and hence was associated with a  
23  
24 significantly lower risk of thromboembolic events (HR 0.75, 95% CI 0.60-0.95 for those initiated  
25 10 on OAC therapy and HR 0.77, 95% CI 0.64-0.92 for those not initiated on OAC therapy). Further,  
26  
27 11 among those initiated on OAC therapy, AF secondary to surgery AF was associated with an  
28  
29 12 increased risk of thromboembolic events (HR 1.23, 95% CI 1.01-1.50)  
30  
31  
32 13  
33  
34  
35

## 36 15 **Discussion**

37  
38  
39 16 We examined long-term outcomes in patients with secondary and primary AF. The study had two  
40  
41 17 main findings: first, different subtypes of secondary AF were in general associated with the same  
42  
43 18 thromboembolic risk as primary AF. Secondly, OAC initiation-rates differed significantly across  
44  
45 19 secondary AF subtypes. Further, OAC therapy vs. no OAC therapy were associated with a lower  
46  
47 20 thromboembolic risk in those with AF secondary to infections and >1 precipitant while no  
48  
49 21 significant risk-reduction was seen for patients with AF secondary to the other precipitants.  
50  
51  
52  
53  
54

#### 55 23 *Thromboembolic risk*

56  
57  
58  
59  
60

1  
2  
3  
4 1 Despite of lower re-hospitalization rates with AF, secondary AF was in general associated with the  
5  
6 2 same thromboembolic risk as primary AF. AF secondary to thyrotoxicosis was associated with a  
7  
8  
9 3 lower thromboembolic risk compared with primary. In contrast, AF secondary to infections were  
10  
11 4 associated with an increased thromboembolic risk compared with primary AF. This is in accordance  
12  
13  
14 5 with previous findings.[13–15] In two previous studies, Lubitz et al. and Fauchier et al. examined  
15  
16 6 long-term outcomes in patients with AF secondary to a reversible precipitant compared with  
17  
18 7 primary AF in patients. In both studies, AF secondary to a reversible precipitant was associated  
19  
20 8 with the same thromboembolic risk as presumed primary AF. However, both studies were smaller  
21  
22  
23 9 and with patients included before 2012 and 2010, respectively.[16,17] In summary, our results  
24  
25 10 together with previous studies suggest that secondary AF in general, and maybe with the exception  
26  
27  
28 11 of AF secondary to thyrotoxicosis, may be considered at as similar to primary AF with respect to  
29  
30 12 thromboembolic risk.

#### 31 32 13 33 34 14 *OAC therapy*

35  
36 15 OAC therapy showed a tendency towards a lower thromboembolic risk in secondary AF patients,  
37  
38  
39 16 but did only reach statistical significance for patients with AF secondary to infection and >1  
40  
41 17 precipitant. Recently, Quon et al. examined risk of thromboembolic events and bleeding in patients  
42  
43  
44 18 with AF secondary to acute coronary syndrome, acute pulmonary disease, and infection according  
45  
46 19 to OAC therapy status after discharge. In that study, OAC therapy was not associated with lower  
47  
48 20 risk of thromboembolic events in patients with AF secondary to the before mentioned precipitants.  
49  
50  
51 21 However, the analyses on long-term outcomes were based on logistic regression analysis, and did  
52  
53 22 therefore not include survival time in the model. Since patients with secondary AF in our study  
54  
55 23 seemed to die at a higher rate than patients with regular AF, the time perspective is crucial when  
56  
57  
58 24 studying long-term outcomes in this setting.[18] Studies with a clinical randomized design would  
59  
60

1  
2  
3  
4 1 be able to show whether patients with secondary AF benefit from OAC therapy on the same terms  
5  
6 2 as patients with primary AF.  
7  
8  
9 3

#### 11 4 *OAC treatment-rates*

13 5 The non-matched population allowed us to describe trends in OAC therapy initiation in patients  
14 6 with secondary and primary AF. In patients with primary AF, 38.5% of the patients were initiated  
15 7 on OAC therapy at the index date. This is in accordance with previous findings, taking into account  
16 8 that our study period went back to 1996 when treatment rates were lower than today.[19,20] In  
17 9 2017, Chean et al. assessed current practice of AF among critically ill patients with new-onset AF.  
18 10 The study was based on questionnaires answered by members of the Intensive Care Society in UK.  
19 11 The results revealed that 63.8% of the respondents would not regularly anti-coagulate critically ill  
20 12 patients with new-onset AF. We found important differences in OAC therapy initiation rates in  
21 13 patients with secondary AF according to precipitant. Patients with alcohol intoxication had the  
22 14 lowest initiation rate of OAC therapy (9.9%). Almost 50% of this patient group had a CHA<sub>2</sub>DS<sub>2</sub>-  
23 15 VASc score of 0 and hence no indication for OAC therapy. Further patients with alcohol abuse may  
24 16 have poor compliance and increased bleeding risk.[21] Consequently, there may be caution among  
25 17 physicians in prescribing OACs for this patient group. In 2011, Traube and colleagues reviewed the  
26 18 literature with respect to thromboembolic risk in patients with AF secondary to thyrotoxicosis. They  
27 19 concluded that OAC therapy should be initiated for those patients who did not have any  
28 20 contraindications for treatment.[22] This could explain the high OAC treatment initiation rates in  
29 21 this patient group (43.9%).  
30  
31  
32  
33  
34  
35  
36  
37  
38  
39  
40  
41  
42  
43  
44  
45  
46  
47  
48  
49  
50  
51  
52  
53  
54

#### 55 23 *Limitations*

56  
57  
58  
59  
60

1  
2  
3  
4 1 First of all, this study was a retrospective registry-based study and hence no causative relationships  
5  
6 2 can be drawn. Our definition of secondary AF was based on a hospital admission with AF and a  
7  
8 3 reversible precipitant. Both diagnoses were registered at the discharge date, and therefore we may  
9  
10 4 have included patients in the secondary AF group who developed AF before the precipitant (e.g.  
11  
12 5 patients admitted with AF who developed infection during their hospital stay), and thereby should  
13  
14 6 have been classified as patients with primary AF. Moreover, we had no access to patient files, and  
15  
16 7 we did not know whether the patients were discharged in sinus rhythm or with AF. Also, no data  
17  
18 8 were available with regard to the physicians' considerations when choosing between OAC therapy  
19  
20 9 and no OAC therapy. However, this study was based on a nationwide cohort of patients with many  
21  
22 10 years of follow-up and data from high-quality registries. It reveals unexpected results that should be  
23  
24 11 considered in future treatment guidelines for patients with secondary AF.  
25  
26  
27  
28  
29  
30  
31

### 32 13 *Conclusion*

33  
34 14 In this study we found that patients with secondary AF carried a similar associated thromboembolic  
35  
36 15 risk as those with primary AF. Current guidelines lack data on this subject and our results suggests  
37  
38 16 that AF in relation to known triggers may be considered as other singular AF.  
39  
40  
41  
42

### 43 18 **Funding**

44  
45 19 This research received no specific grant from any funding agency in the public, commercial, or not-  
46  
47 20 for-profit sectors.  
48  
49  
50  
51

### 52 22 **Conflicts of interest**

53  
54 23 AG: None. TK: Consultant fees from BMS, Astra Zeneca, Roche, Boehringer-Ingelheim, Bayer,  
55  
56 24 MSD. JBO: Speaker for Bristol-Myers Squibb, Boehringer Ingelheim, Bayer, and AstraZeneca.  
57  
58  
59  
60



1  
2  
3  
4 1 Consultant for Boehringer Ingelheim and Novo Nordisk. Funding for research from Bristol-Myers  
5  
6 2 Squibb and The Capital Region of Denmark, Foundation for Health Research. ANB: None J.H.B:  
7  
8  
9 3 None. GHG: Research grants from Bayer, Bristol-Myers Squibb, AstraZeneca and Boehring  
10  
11 4 Ingelheim. CTP: Consultant fees and research funding from Bayer and Biotronic LK: None. ELF:  
12  
13 5 Has previously received research funding from Janssen and Janssen and Bristol-Myers Squibb.  
14  
15  
16 6

### 7 **Author contributions**

8 The study idea was conceived by AG, TK, and ELF, study design was developed by AG, TK, JBO,  
9 ANB, JHB, GHG, CTP, LK, and ELF, data analyses were made by AG. AG drafted the first version  
10 of the paper and all authors participated in the critical discussions and interpretation of findings. All  
11 authors have participated in the revisions of the draft and have approved the final version.  
12

### 13 **Acknowledgements**

14 None.

## References

1. Fuster V, Rydén LE, Cannom DS, et al. 2011 ACCF/AHA/HRS focused updates incorporated into the ACC/AHA/ESC 2006 guidelines for the management of patients with atrial fibrillation: a report of the American College of Cardiology Foundation/American Heart Association Task Force on practice guidelines. *Circulation*. 2011 Mar 15;123(10):e269-367.
2. Lip GYH, Lane DA. Stroke prevention in atrial fibrillation: a systematic review. *JAMA*. 2015 May 19;313(19):1950-62.
3. Kirchhof P, Benussi S, Kotecha D, et al. 2016 ESC Guidelines for the management of atrial fibrillation developed in collaboration with EACTS. *Eur Heart J*. 2016 Oct 7;37(38):2893-962.
4. January CT, Wann LS, Alpert JS, et al. 2014 AHA/ACC/HRS Guideline for the Management of Patients With Atrial Fibrillation. *Circulation*. 2014 Dec 2;130(23):e199-267.
5. Pedersen CB. The Danish Civil Registration System. *Scand J Public Health*. 2011 Jan 7;39(7 suppl):22-5.
6. Lynge E, Sandegaard JL, Rebolj M. The Danish National Patient Register. *Scand J Public Health*. 2011 Jan 7;39(7 suppl):30-3.
7. Helweg-Larsen K. The Danish Register of Causes of Death. *Scand J Public Health*. 2011 Jan 7;39(7 suppl):26-9.
8. Kildemoes HW, Sørensen HT, Hallas J. The Danish National Prescription Registry. *Scand J Public Health*. 2011 Jan 7;39(7 suppl):38-41.
9. Locally Written SAS Macros - Division of Biomedical Statistics and Informatics - Mayo Clinic Research [Internet]. Mayo Clinic. [cited 2017 May 3]. Available from: <http://www.mayo.edu/research/departments-divisions/department-health-sciences-research/division-biomedical-statistics-informatics/software/locally-written-sas-macros>

- 1  
2  
3  
4 1 10. Rix TA, Riahi S, Overvad K, Lundbye-Christensen S, Schmidt EB, Joensen AM.  
5  
6 2 Validity of the diagnoses atrial fibrillation and atrial flutter in a Danish patient registry. *Scand*  
7  
8  
9 3 *Cardiovasc J SCJ*. 2012 Jun;46(3):149–53.  
10  
11 4 11. Krarup L-H, Boysen G, Janjua H, Prescott E, Truelsen T. Validity of stroke diagnoses  
12  
13 5 in a National Register of Patients. *Neuroepidemiology*. 2007;28(3):150–4.  
14  
15 6 12. R Core Team. R: A Language and Environment for Statistical Computing [Internet].  
16  
17 [cited 2017 Sep 19]. Available from: <https://www.R-project.org/>  
18 7  
19  
20 8 13. Gundlund A, Kümler T, Olesen JB, et al. Comparative thromboembolic risk in atrial  
21  
22 9 fibrillation patients with and without a concurrent infection. *Am Heart J*. 2018 Jul 10;204:43–51.  
23  
24 10 14. Walkey AJ, Hammill BG, Curtis LH, Benjamin EJ. Long-term outcomes following  
25  
26 11 development of new-onset atrial fibrillation during sepsis. *Chest*. 2014 Nov;146(5):1187–95.  
27  
28 12 15. Adderley NJ, Nirantharakumar K, Marshall T. Risk of stroke and transient ischaemic  
29  
30 13 attack in patients with a diagnosis of resolved atrial fibrillation: retrospective cohort studies. *BMJ*.  
31  
32 14 2018 May 9;361:k1717.  
33  
34 15 16. Lubitz SA, Yin X, Rienstra M, et al. Long-term outcomes of secondary atrial  
35  
36 16 fibrillation in the community: the Framingham Heart Study. *Circulation*. 2015 May  
37  
38 17 12;131(19):1648–55.  
39  
40 18 17. Fauchier L, Clementy N, Bisson A, et al. Prognosis in patients with atrial fibrillation  
41  
42 19 and a presumed ‘temporary cause’ in a community-based cohort study. *Clin Res Cardiol Off J Ger*  
43  
44 20 *Card Soc*. 2017 Mar;106(3):202–10.  
45  
46 21 18. Quon MJ, Behloul H, Pilote L. Anticoagulant Use and Risk of Ischemic Stroke and  
47  
48 22 Bleeding in Patients With Secondary Atrial Fibrillation Associated With Acute Coronary  
49  
50 23 Syndromes, Acute Pulmonary Disease, or Sepsis. *JACC Clin Electrophysiol*. 2017 Sep 27;500.  
51  
52 24 19. Gadsbøll K, Staerk L, Fosbøl EL, et al. Increased use of oral anticoagulants in patients  
53  
54  
55  
56  
57  
58  
59  
60

- 1  
2  
3  
4 1 with atrial fibrillation: temporal trends from 2005 to 2015 in Denmark. *Eur Heart J*. 2017 Jan 21;  
5  
6 20. Gundlund A, Xian Y, Peterson ED, et al. Prestroke and Poststroke Antithrombotic  
7  
8  
9 3 Therapy in Patients With Atrial Fibrillation: Results From a Nationwide Cohort. *JAMA Netw*  
10  
11 4 *Open*. 2018 May 18;1(1):e180171–e180171.  
12  
13 5 21. Roth JA, Bradley K, Thummel KE, Veenstra DL, Boudreau D. Alcohol misuse,  
14  
15 6 genetics, and major bleeding among warfarin therapy patients in a community setting.  
16  
17 7 *Pharmacoepidemiol Drug Saf*. 2015 Jun;24(6):619–27.  
18  
19  
20 8 22. Traube E, Coplan NL. Embolic risk in atrial fibrillation that arises from  
21  
22 9 hyperthyroidism: review of the medical literature. *Tex Heart Inst J*. 2011;38(3):225–8.  
23  
24  
25  
26  
27  
28  
29  
30  
31  
32  
33  
34  
35  
36  
37  
38  
39  
40  
41  
42  
43  
44  
45  
46  
47  
48  
49  
50  
51  
52  
53  
54  
55  
56  
57  
58  
59  
60

1  
2  
3  
4 **1 Figure legends**

5  
6  
7 2 Figure 1: Patient selection

8  
9 3 Figure 2: Cumulative incidence of long-term outcomes by secondary precipitant and OAC therapy  
10  
11 4 at the index date. A: Thromboembolic events, B: Death

12  
13 5 Figure 3: Number of events, incidence rates, and crude and adjusted Hazard ratios of long-term  
14  
15 6 outcomes in patients with secondary vs. primary AF

16  
17  
18 7 Figure 4: Adjusted hazard ratios of long-term outcomes in patients with AF initiated vs. not  
19  
20 8 initiated on OAC therapy (stratified according to type of AF)  
21  
22  
23  
24  
25  
26  
27  
28  
29  
30  
31  
32  
33  
34  
35  
36  
37  
38  
39  
40  
41  
42  
43  
44  
45  
46  
47  
48  
49  
50  
51  
52  
53  
54  
55  
56  
57  
58  
59  
60

**Table 1: Baseline characteristics of the matched population**

|                                                      | Alcohol intoxication group |                   | Thyrotoxicosis group |                    | Myocardial infarction group |                    | Surgery group     |                    | Infection group     |                      | >1 precipitant group |                    |
|------------------------------------------------------|----------------------------|-------------------|----------------------|--------------------|-----------------------------|--------------------|-------------------|--------------------|---------------------|----------------------|----------------------|--------------------|
|                                                      | Sec. AF<br>N=335           | Prim. AF<br>N=335 | Sec. AF<br>N=2507    | Prim. AF<br>N=2507 | Sec. AF<br>N=4773           | Prim. AF<br>N=4773 | Sec. AF<br>N=5229 | Prim. AF<br>N=5229 | Sec. AF<br>N=21,824 | Prim. AF<br>N=21,824 | Sec. AF<br>N=5055    | Prim. AF<br>N=5055 |
| <b>Demographics</b>                                  |                            |                   |                      |                    |                             |                    |                   |                    |                     |                      |                      |                    |
| Age, median (IQR*)                                   | 59 (49-66)                 | 59 (49-66)        | 73 (63-81)           | 73 (63-81)         | 77 (69-83)                  | 77 (69-83)         | 75 (67-82)        | 75 (67-82)         | 79 (71-86)          | 79 (71-86)           | 76 (68-83)           | 76 (68-83)         |
| Male, n (%)                                          | 276 (82.4)                 | 276 (82.4)        | 521 (20.8)           | 521 (20.8)         | 2705 (56.7)                 | 2705 (56.7)        | 2724 (52.1)       | 2724 (52.1)        | 10,370 (47.5)       | 10,370 (47.5)        | 2676 (52.9)          | 2676 (52.9)        |
| <b>Comorbidities, n (%)</b>                          |                            |                   |                      |                    |                             |                    |                   |                    |                     |                      |                      |                    |
| Cancer                                               | 16 (4.8)                   | 29 (8.7)          | 288 (11.5)           | 296 (11.8)         | 586 (12.3)                  | 688 (14.4)         | 1349 (25.8)       | 882 (16.9)         | 4341 (19.9)         | 3571 (16.4)          | 958 (19.0)           | 807 (16.0)         |
| Chronic kidney disease                               | 11 (3.3)                   | 8 (2.4)           | 61 (2.4)             | 49 (2.0)           | 289 (6.1)                   | 233 (4.7)          | 352 (6.7)         | 198 (3.8)          | 1564 (7.2)          | 748 (3.4)            | 431 (8.5)            | 212 (4.2)          |
| COPD†                                                | 28 (8.4)                   | 23 (6.9)          | 234 (9.3)            | 221 (8.8)          | 619 (13.0)                  | 565 (11.8)         | 665 (12.7)        | 520 (9.9)          | 4696 (21.5)         | 2093 (9.6)           | 914 (18.1)           | 519 (10.3)         |
| Diabetes                                             | 26 (7.8)                   | 18 (5.4)          | 189 (7.5)            | 159 (6.3)          | 575 (12.0)                  | 556 (11.6)         | 503 (9.6)         | 423 (8.1)          | 2167 (9.9)          | 1737 (8.0)           | 498 (9.9)            | 554 (11.0)         |
| Heart failure                                        | 24 (7.2)                   | 18 (5.4)          | 445 (17.8)           | 388 (15.5)         | 1660 (34.8)                 | 1076 (22.5)        | 966 (18.5)        | 851 (16.3)         | 5109 (23.4)         | 3709 (17.0)          | 1574 (31.1)          | 925 (18.3)         |
| Hypertension                                         | 64 (19.1)                  | 78 (23.3)         | 1309 (52.2)          | 1249 (49.8)        | 3290 (68.9)                 | 3204 (67.1)        | 2484 (47.5)       | 2695 (51.5)        | 10,445 (47.9)       | 11,475 (52.6)        | 2694 (53.3)          | 3007 (59.5)        |
| IHD‡                                                 | 43 (12.8)                  | 53 (15.8)         | 333 (13.3)           | 455 (18.1)         | 4773 (100)                  | 1604 (33.6)        | 1753 (33.5)       | 1332 (25.5)        | 4696 (21.5)         | 5069 (23.2)          | 3072 (60.8)          | 1423 (28.2)        |
| PAD§                                                 | 7 (2.1)                    | 8 (2.4)           | 78 (3.1)             | 83 (3.3)           | 375 (7.9)                   | 293 (6.1)          | 468 (9.0)         | 233 (4.5)          | 1392 (6.4)          | 932 (4.3)            | 448 (8.9)            | 269 (5.3)          |
| Prior bleeding event                                 | 81 (24.2)                  | 42 (12.5)         | 243 (9.7)            | 249 (9.9)          | 722 (15.1)                  | 715 (15.0)         | 1267 (24.2)       | 833 (15.9)         | 4319 (19.8)         | 3463 (15.9)          | 1171 (23.2)          | 811 (16.0)         |
| Prior thromboembolic event                           | 24 (7.2)                   | 24 (7.2)          | 138 (5.5)            | 183 (7.3)          | 483 (10.1)                  | 698 (14.6)         | 571 (10.9)        | 570 (10.9)         | 2651 (12.1)         | 2278 (10.4)          | 603 (11.9)           | 635 (12.6)         |
| <b>Risk scores</b>                                   |                            |                   |                      |                    |                             |                    |                   |                    |                     |                      |                      |                    |
| CHA <sub>2</sub> DS <sub>2</sub> -VASC <sup>  </sup> |                            |                   |                      |                    |                             |                    |                   |                    |                     |                      |                      |                    |
| Median (IQR*)                                        | 1 (0-2)                    | 1 (0-2)           | 3 (2-4)              | 3 (2-4)            | 4 (3-5)                     | 3 (3-4)            | 3 (2-4)           | 3 (2-4)            | 3 (2-4)             | 3 (2-4)              | 4 (2-5)              | 3 (2.4)            |
| 0                                                    | 158 (47.2)                 | 158 (47.2)        | 405 (16.2)           | 405 (16.2)         | 0                           | 0                  | 391 (7.5)         | 391 (7.5)          | 1328 (6.1)          | 1328 (6.1)           | 269 (5.3)            | 269 (5.3)          |
| 1-2                                                  | 118 (35.2)                 | 118 (35.2)        | 530 (3.0)            | 530 (3.0)          | 670 (14.0)                  | 670 (14.0)         | 1406 (26.9)       | 1406 (26.9)        | 5148 (23.6)         | 5148 (23.6)          | 1005 (19.9)          | 1005 (19.9)        |
| ≥3                                                   | 59 (17.6)                  | 59 (17.6)         | 1572 (62.7)          | 1572 (62.7)        | 4103 (86.0)                 | 4103 (86.0)        | 3432 (65.6)       | 3432 (65.6)        | 15,348 (70.3)       | 15,348 (70.3)        | 3781 (74.8)          | 3781 (74.8)        |
| HAS-BLED <sup>#</sup>                                |                            |                   |                      |                    |                             |                    |                   |                    |                     |                      |                      |                    |
| Median (IQR*)                                        | 2 (1-3)                    | 1 (0-2)           | 2 (1-3)              | 2 (1-3)            | 3 (2-3)                     | 2 (2-3)            | 2 (1-3)           | 2 (1-3)            | 2 (1-3)             | 2 (1-3)              | 2 (2-3)              | 2 (2-3)            |
| 0                                                    | 0                          | 0                 | 355 (14.2)           | 331 (13.2)         | 134 (2.8)                   | 76 (1.6)           | 289 (5.5)         | 381 (7.3)          | 1003 (4.6)          | 1147 (5.2)           | 208 (4.1)            | 242 (4.8)          |
| 1-2                                                  | 232 (69.3)                 | 155 (46.3)        | 1460 (58.2)          | 1440 (57.4)        | 2552 (53.5)                 | 2863 (54.8)        | 2863 (54.8)       | 2935 (56.1)        | 12,130 (55.6)       | 12,129 (55.6)        | 2422 (47.9)          | 2638 (52.2)        |
| ≥3                                                   | 103 (30.8)                 | 52 (15.5)         | 692 (27.6)           | 736 (29.4)         | 2145 (6.7)                  | 2077 (6.5)         | 2077 (39.7)       | 1913 (36.6)        | 8691 (39.8)         | 8548 (39.2)          | 2425 (48.0)          | 2175 (43.0)        |
| <b>Pharmacotherapy, n (%)</b>                        |                            |                   |                      |                    |                             |                    |                   |                    |                     |                      |                      |                    |
| OAC <sup>**</sup> therapy, n (%)                     | 33 (9.9)                   | 33 (9.9)          | 1100 (43.9)          | 1100 (43.9)        | 1311 (27.5)                 | 1311 (27.5)        | 1150 (22.0)       | 1150 (22.0)        | 5985 (27.4)         | 5985 (27.4)          | 1087 (21.5)          | 1087 (21.5)        |
| Amiodarone                                           | ≤3                         | 6 (1.8)           | 33 (1.3)             | 62 (2.5)           | 359 (7.5)                   | 158 (3.3)          | 443 (8.5)         | 163 (3.1)          | 617 (2.8)           | 574 (2.6)            | 418 (8.3)            | 154 (3.0)          |

1  
2  
3  
4  
5  
6  
7  
8  
9  
10  
11  
12  
13  
14  
15  
16  
17  
18  
19  
20  
21  
22  
23  
24  
25  
26  
27  
28  
29  
30  
31  
32  
33  
34  
35  
36  
37  
38  
39  
40  
41  
42  
43  
44  
45  
46

|            |           |          |             |            |             |             |             |             |             |             |             |             |
|------------|-----------|----------|-------------|------------|-------------|-------------|-------------|-------------|-------------|-------------|-------------|-------------|
| Digoxin    | 49 (14.6) | 29 (8.7) | 1000 (39.9) | 916 (36.5) | 1207 (25.3) | 1502 (31.5) | 1089 (20.8) | 1285 (24.6) | 7973 (36.5) | 6286 (28.8) | 1184 (23.4) | 1223 (24.2) |
| Flecainide | 0 (0)     | ≤ 3      | 13 (0.5)    | 29 (1.2)   | 9 (0.2)     | 32 (0.7)    | 12 (0.2)    | 52 (1.0)    | 40 (0.2)    | 156 (0.7)   | 6 (0.1)     | 27 (0.5)    |

\*IQR: interquartile range. †COPD: chronic obstructive pulmonary disease. ‡IHD: ischemic heart disease. §PAD: peripheral artery disease. ||CHA<sub>2</sub>DS<sub>2</sub>-VASc: Risk score for stroke: congestive heart failure/LV function, hypertension, age 65-74 years, age>74 years (2 points), diabetes, stroke/TIA/systemic embolism (2 points), vascular disease, sex category (female); #HAS-BLED: Risk score for bleeding: hypertension, abnormal renal/liver function, history of stroke, history of bleeding, INR (left out due to missing data), age>65 years, drug consumption with antiplatelet agents/non-steroidal inflammatory drugs, alcohol abuse. \*\*OAC: oral anticoagulation.

For peer review only

**Figure 1: Patient selection**

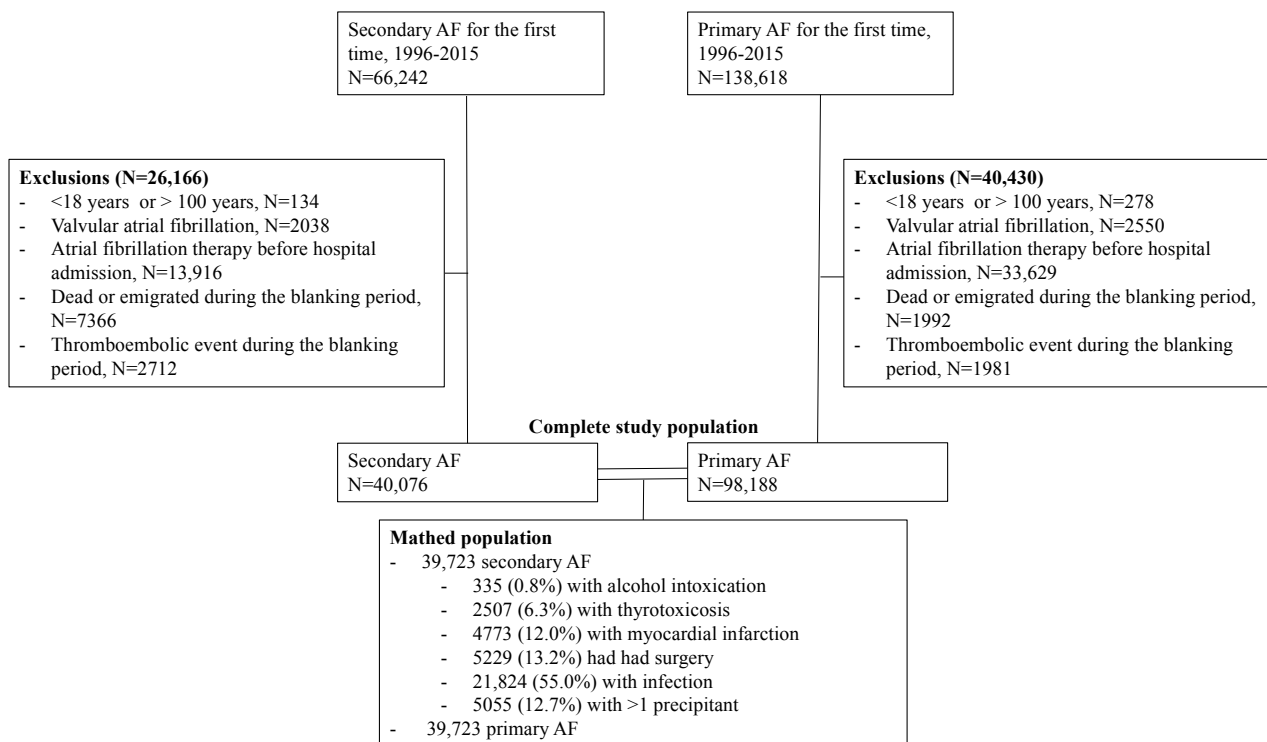

review only



Figure 2: Cumulative incidence of long-term outcomes by type of AF and OAC therapy at the index date

A: Thromboembolic events

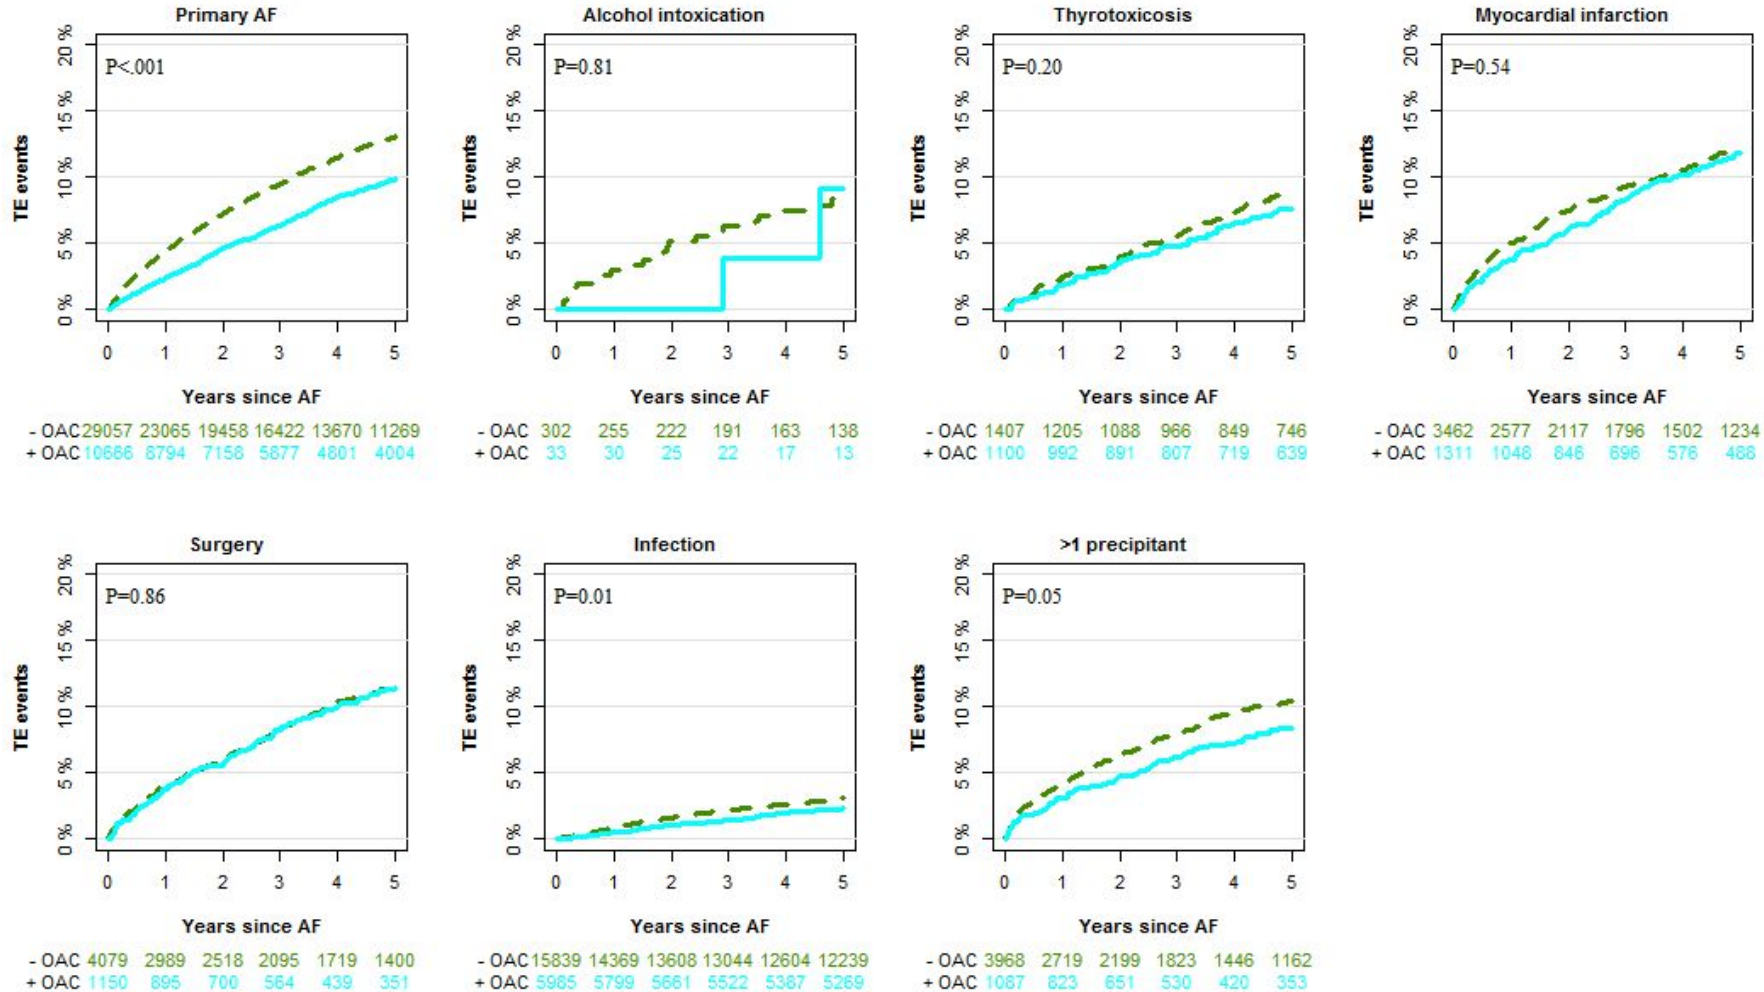

B: Death

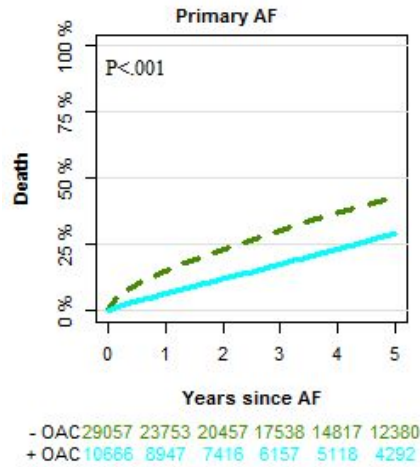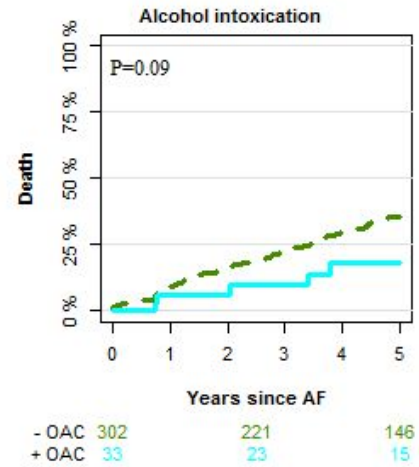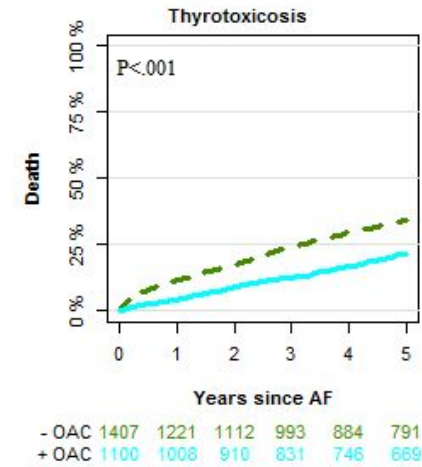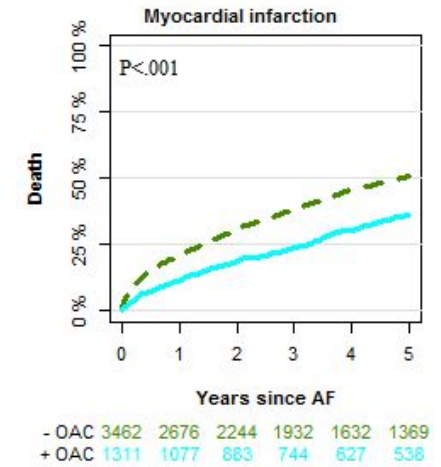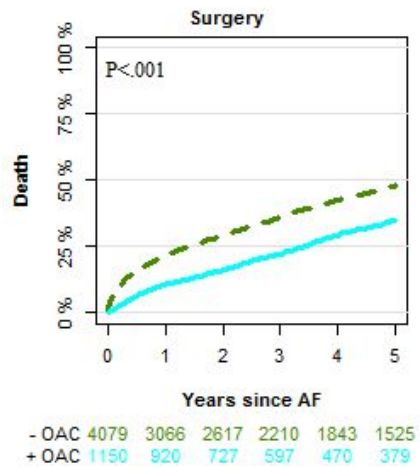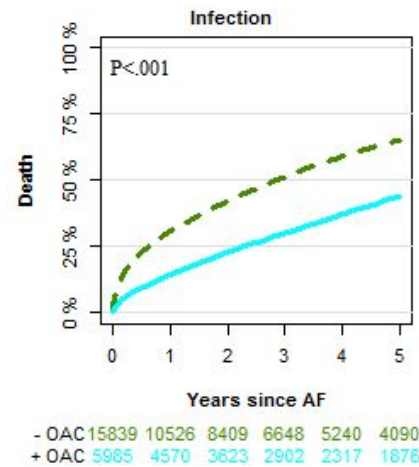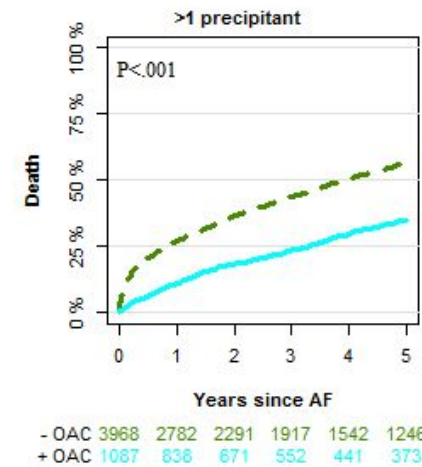

**Figure 3: Number of events, incidence rates, and crude and adjusted hazard ratios of long-term outcomes in patients with secondary vs. primary AF according to secondary precipitant and OAC therapy at the index date**

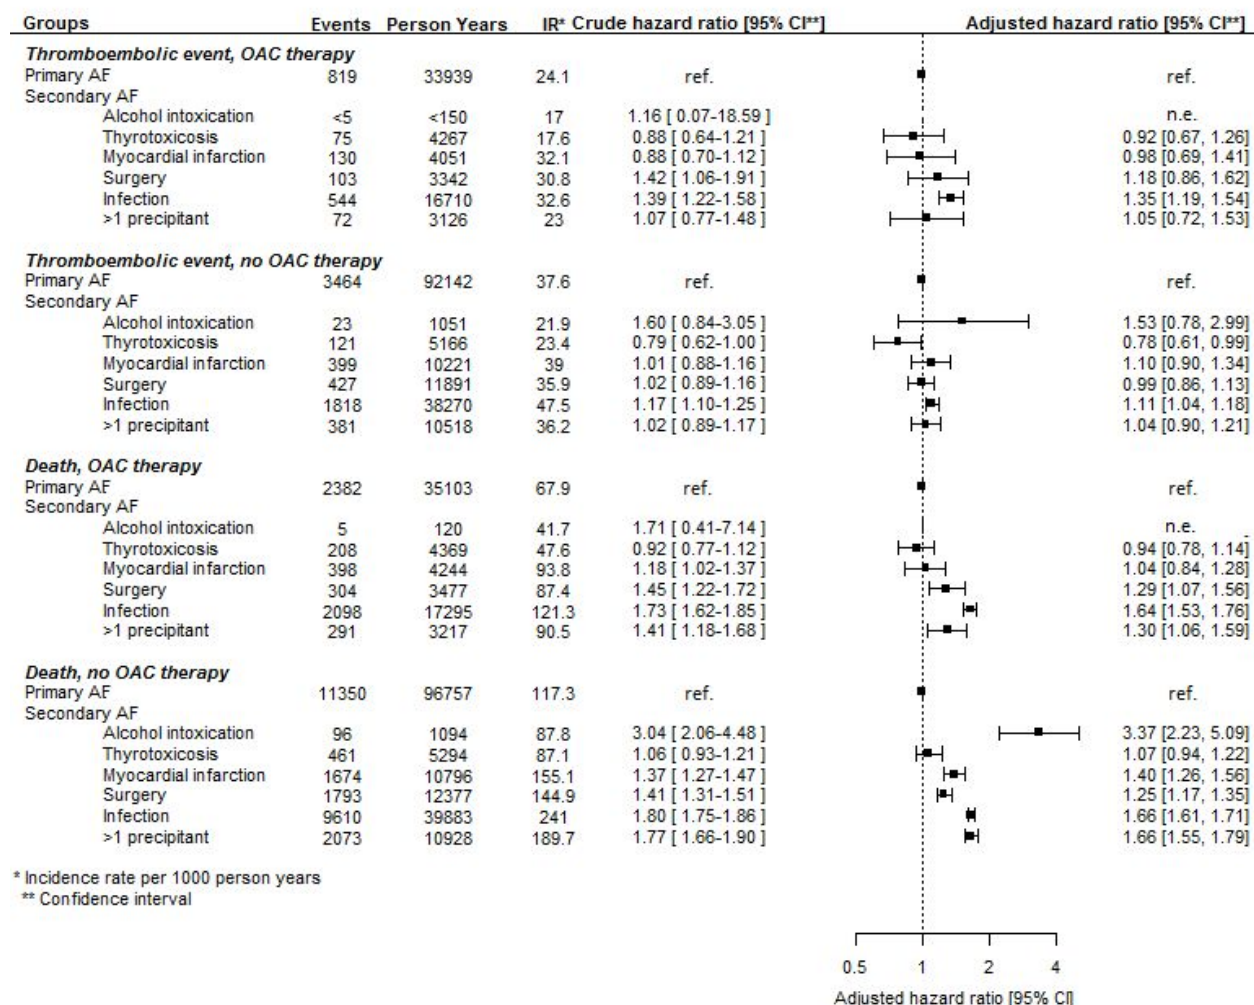

Adjustments: age groups, peripheral artery disease, heart failure, hypertension, prior thromboembolic event, ischemic heart disease, chronic kidney disease, diabetes, prior bleeding event, cancer, antiarrhythmic therapy (amiodarone, digoxin, flecainide) at the index date.

**Figure 4: Adjusted hazard ratios of long-term outcomes in patients with AF initiated vs. not initiated on OAC therapy (stratified according to type of AF)**

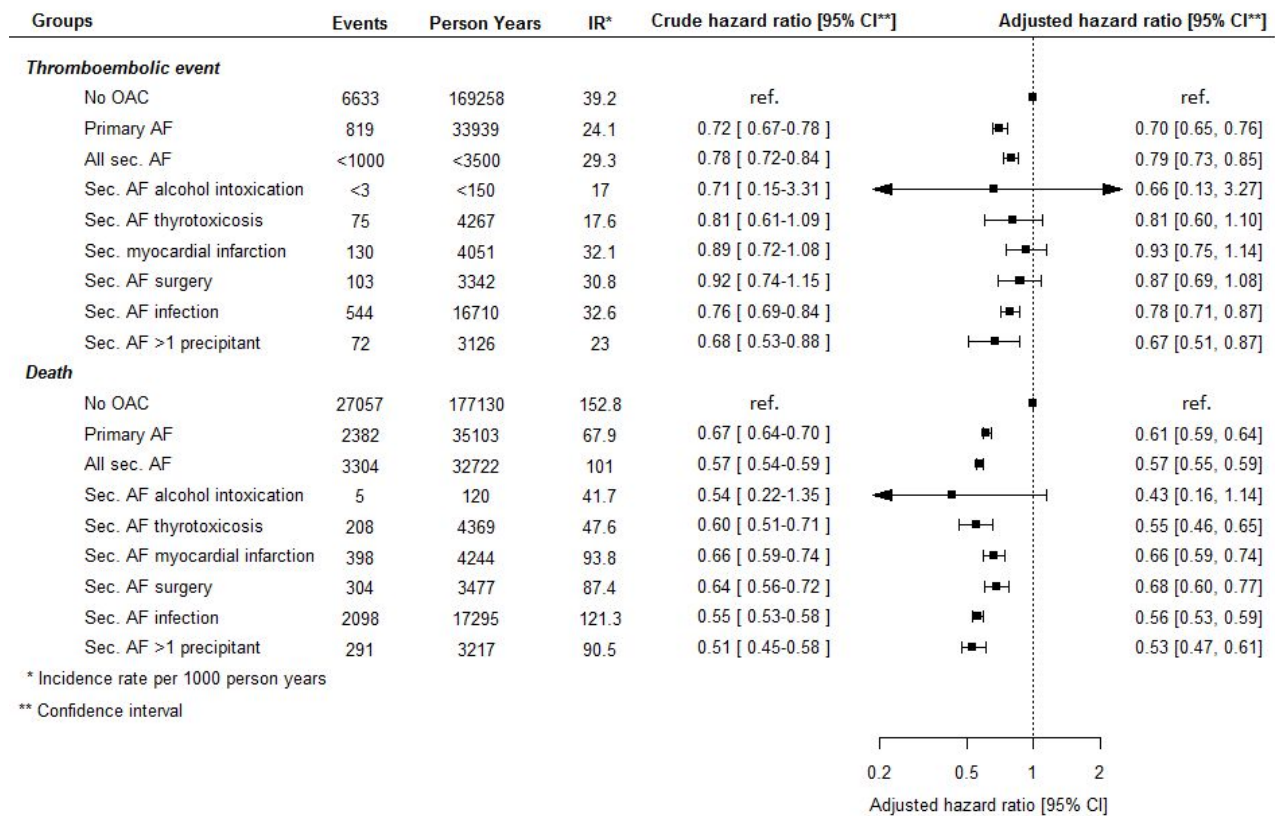

Adjustments: age groups, peripheral artery disease, heart failure, hypertension, prior thromboembolic event, ischemic heart disease, chronic kidney disease, diabetes, prior bleeding event, cancer, antiarrhythmic therapy (amiodarone, digoxin, flecainide) at the index date.

1  
2  
3  
4  
5  
6  
7  
8  
9  
10  
11  
12  
13  
14  
15  
16  
17  
18  
19  
20  
21  
22  
23  
24  
25  
26  
27  
28  
29  
30  
31  
32  
33  
34  
35  
36  
37  
38  
39  
40  
41  
42  
43  
44  
45  
46  
47  
48  
49  
50  
51  
52  
53  
54  
55  
56  
57  
58  
59  
60

For peer review only

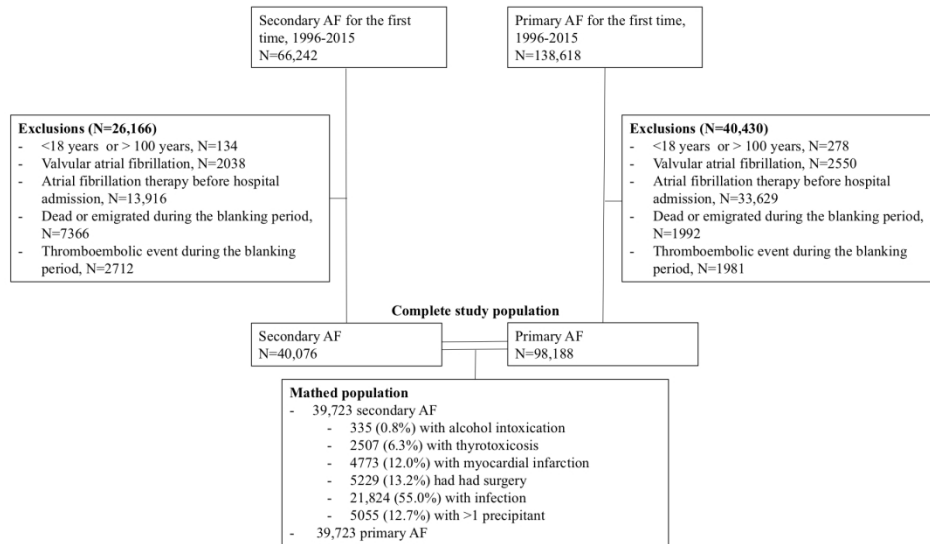

Figure 1

338x190mm (150 x 150 DPI)

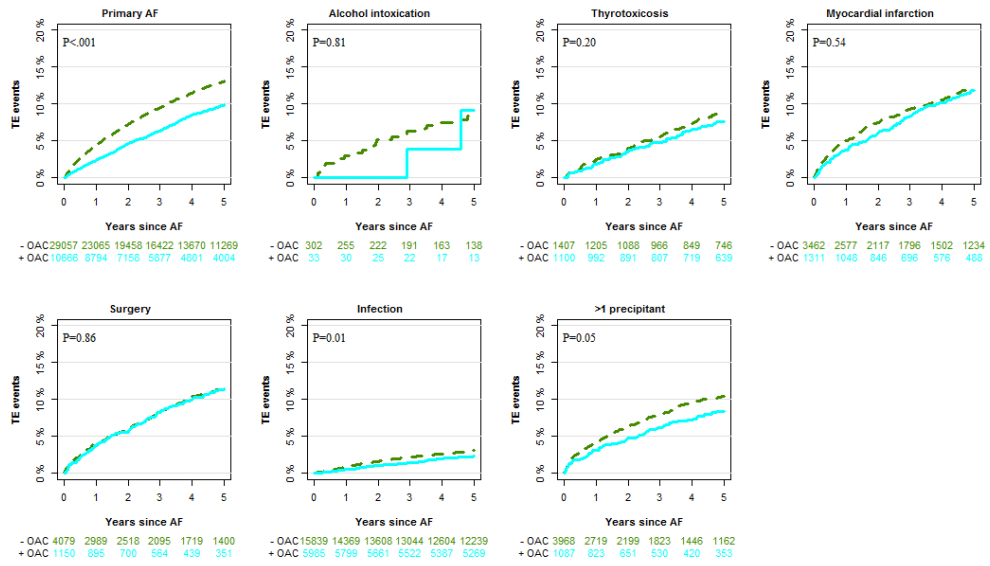

Figure 2A

279x165mm (96 x 96 DPI)

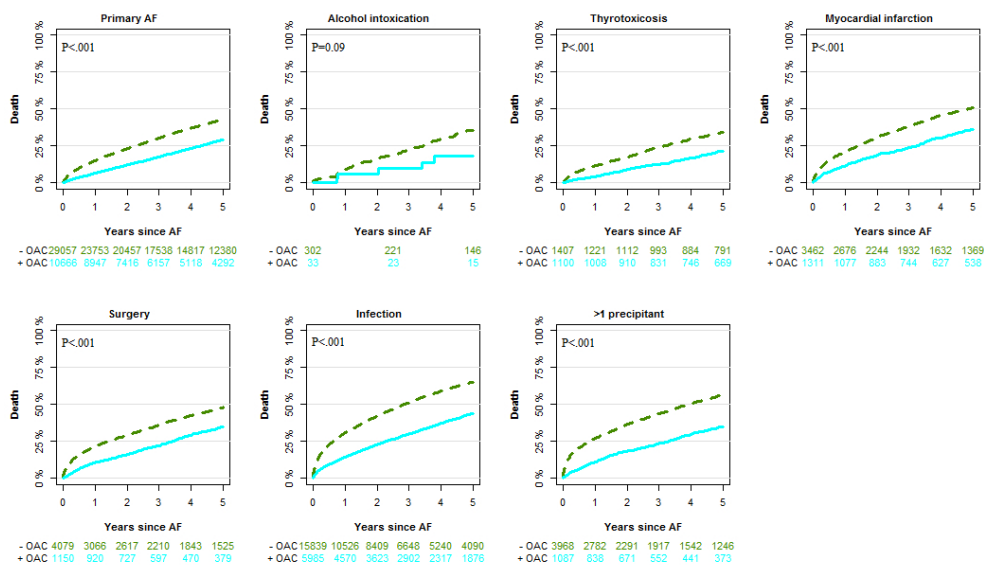

Figure 2B

279x165mm (96 x 96 DPI)



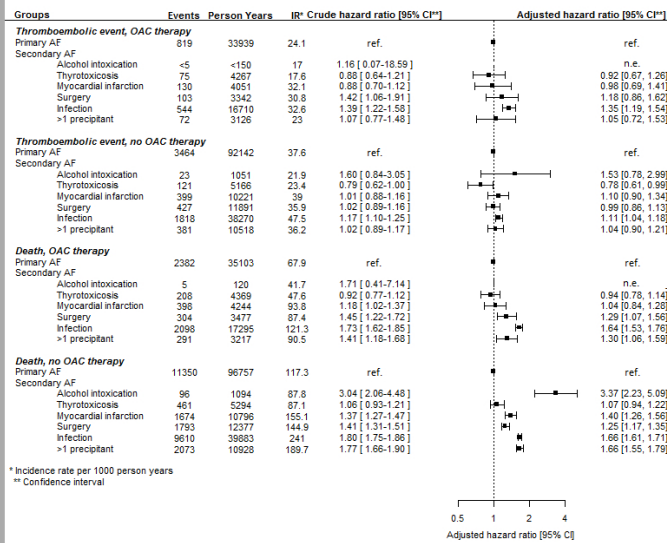

Figure 3

304x172mm (96 x 96 DPI)

1  
2  
3  
4  
5  
6  
7  
8  
9  
10  
11  
12  
13  
14  
15  
16  
17  
18  
19  
20  
21  
22  
23  
24  
25  
26  
27  
28  
29  
30  
31  
32  
33  
34  
35  
36  
37  
38  
39  
40  
41  
42  
43  
44  
45  
46  
47  
48  
49  
50  
51  
52  
53  
54  
55  
56  
57  
58  
59  
60

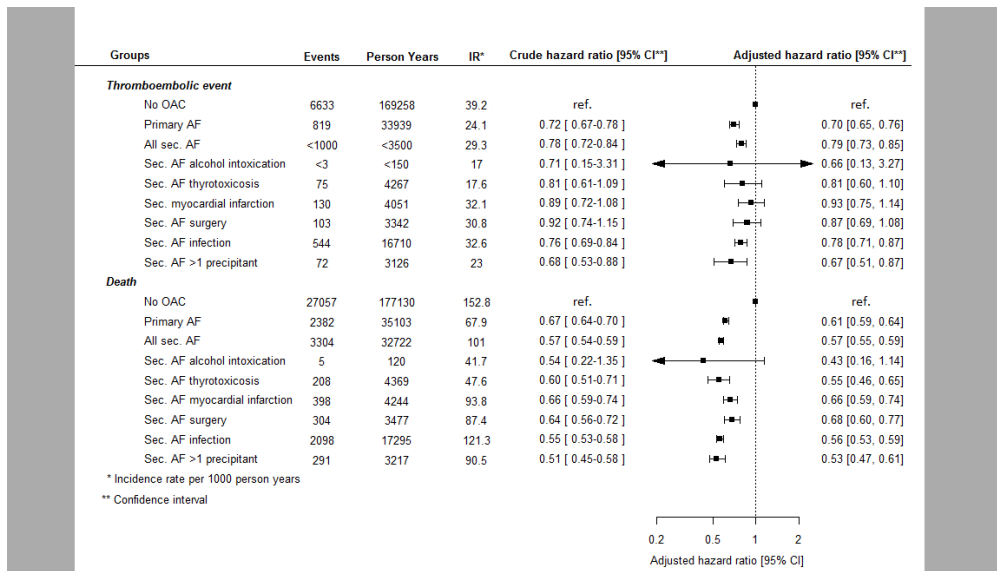

Figure 4

304x172mm (96 x 96 DPI)

## Supplemental material

### Comparative thromboembolic risk in secondary atrial fibrillation in a nationwide cohort

Anna Gundlund, MD, PhD; Thomas Kümler, MD, PhD; Anders N. Bonde, MD; Jawad H. Butt, MD; Gunnar H. Gislason, MD, PhD; Christian Torp-Pedersen, MD, DMSc; Lars Køber, MD, DMSc; Jonas B. Olesen, MD, PhD; Emil L. Fosbøl, MD, PhD

Online Table 1: Specification of diagnoses by international classification of diseases (ICD-8 and ICD-10) codes and pharmacotherapy by anatomical therapeutic chemical classification (ATC) codes.

Online Table 2: Baseline characteristics of the non-matched population, patients initiated on OAC therapy

Online S3: Baseline characteristics of the non-matched population, patients not initiated on OAC therapy

**Online Table 1: Specification of diagnoses by international classification of diseases (ICD-8 and ICD-10) codes and pharmacotherapy by anatomical therapeutic chemical classification (ATC) codes.**

| <b>Precipitants</b>                    | <b>ICD-10 codes and NCSP, NOMESCO Classification of Surgical Procedures</b>                                                                                                                                                                                                                                                                                                                                                                                                                                                                                                                                           |
|----------------------------------------|-----------------------------------------------------------------------------------------------------------------------------------------------------------------------------------------------------------------------------------------------------------------------------------------------------------------------------------------------------------------------------------------------------------------------------------------------------------------------------------------------------------------------------------------------------------------------------------------------------------------------|
| Alcohol intoxication                   | ICD-10: F100, F103, F104, R780, T51, X65                                                                                                                                                                                                                                                                                                                                                                                                                                                                                                                                                                              |
| Infections                             | ICD-10:<br>Certain infectious and parasitic diseases: A00-B99.<br>Infections in the eye and adnexa: H00, H01, H10, H20, H30, H44, H60, H65-H68, H70, H73.0, H73.1<br>Infections in the cardiovascular organs: I30, I32, I33, I38-I41<br>Infections in pulmonary system: J00-J22, J32, J36, J85, J86<br>Infections in the gastrointestinal system: K12, K20, K35-K37, K57, K65, K67, K81, K85<br>Infections in the skin, subcutaneous tissue, bones, muscles, and connective tissue: L00-L08, M00, M01, M60, M63.2, M65, M86, M90.0, M90.1, M90.2<br>Infections in the urogenital system: N00, N01, N05, N30, N70-N77. |
| Myocardial infarction                  | ICD-10: I21                                                                                                                                                                                                                                                                                                                                                                                                                                                                                                                                                                                                           |
| Pulmonary embolism                     | ICD-10: I260, I269, O882D, O882E, T817D                                                                                                                                                                                                                                                                                                                                                                                                                                                                                                                                                                               |
| Surgery                                | NCSP, NOMESCO Classification of Surgical Procedures: KF, KM, KN, KD, KPH, KPI, KJ, KH, KQ, KB, KC, KL, KE, KA, KG, KK.                                                                                                                                                                                                                                                                                                                                                                                                                                                                                                |
| Thyrotoxicosis                         | ICD-10: E05                                                                                                                                                                                                                                                                                                                                                                                                                                                                                                                                                                                                           |
| <b>Outcomes</b>                        |                                                                                                                                                                                                                                                                                                                                                                                                                                                                                                                                                                                                                       |
| Atrial fibrillation re-hospitalization | Hospital admission with primary diagnosis of atrial fibrillation: I48                                                                                                                                                                                                                                                                                                                                                                                                                                                                                                                                                 |
| Thromboembolic event                   | Ischemic stroke: I63, I64<br>Death from stroke: I61-I64<br>Transient ischemic attack: G458, G459<br>Thrombosis or embolism in arteries: I74                                                                                                                                                                                                                                                                                                                                                                                                                                                                           |
| <b>Comorbidities</b>                   | <b>ICD-8 and ICD-10 codes</b>                                                                                                                                                                                                                                                                                                                                                                                                                                                                                                                                                                                         |

|    |                                       |                                                |
|----|---------------------------------------|------------------------------------------------|
| 1  |                                       |                                                |
| 2  |                                       |                                                |
| 3  |                                       |                                                |
| 4  | Atrial fibrillation                   | ICD-10: I48                                    |
| 5  |                                       | ICD-8: 42793, 42794                            |
| 6  |                                       |                                                |
| 7  | Alcohol abuse                         | ICD-10: E24.4, E52, F10, G31.2, G62.1, G72.1,  |
| 8  |                                       | I42.6, K29.2, K70, K86.0, L27.8A, O35.4, T51,  |
| 9  |                                       | Z71.4, Z72.1.                                  |
| 10 |                                       |                                                |
| 11 |                                       | ATC: N07BB                                     |
| 12 |                                       |                                                |
| 13 | Cancer                                | ICD-10: C                                      |
| 14 |                                       |                                                |
| 15 | Chronic kidney disease                | ICD-10: E10.2, E11.2, E13.2, E14.2, I12.0,     |
| 16 |                                       | M32.1B, N02-N08, N11, N12, N14, N15.8,         |
| 17 |                                       | N15.9, N16.0, N16.2-N16.4, N16.8, N18, N19,    |
| 18 |                                       | N26, Q61                                       |
| 19 | Chronic obstructive pulmonary disease | ICD-10: J42, J43, J44                          |
| 20 | Diabetes                              | ATC: A10 (3 months before index)               |
| 21 | Heart failure                         | ICD-10: I11.0, I42, I50, J81                   |
| 22 |                                       |                                                |
| 23 | Hypertension                          | Usage of a combination of at least two of the  |
| 24 |                                       | seven different drug classes at the same time: |
| 25 |                                       |                                                |
| 26 |                                       | 1. Non-loop diuretics                          |
| 27 |                                       | 2. Loop diuretics                              |
| 28 |                                       | 3. Antiadrenergic agents                       |
| 29 |                                       | 4. Beta-blockers                               |
| 30 |                                       | 5. Vasodilators                                |
| 31 |                                       | 6. Calcium channel blockers                    |
| 32 |                                       | 7. Renin-angiotensin system inhibitors         |
| 33 |                                       |                                                |
| 34 |                                       |                                                |
| 35 |                                       |                                                |
| 36 | Ischemic heart disease                | ICD-10: I20-I25                                |
| 37 | Peripheral artery disease             | ICD-10: I70                                    |
| 38 | Prior bleeding                        | ICD-10: D50.0, D62, G951A, H31.3, H05.2A,      |
| 39 |                                       | H35.6, H43.1, H45.0, I31.2, I60-I62, I85.0,    |
| 40 |                                       | I86.4A, J94.2, K22.8F, K25.0, K25.2, K25.4,    |
| 41 |                                       | K25.6, K26.0, K26.2, K26.4, K26.6, K27.0       |
| 42 |                                       | K27.2, K27.4, K27.6, K28.0, K28.2, K28.4,      |
| 43 |                                       | K28.6, K29.8A, K62.5, K63.8B, K63.8C, K66.1,   |
| 44 |                                       | K83.8F, K86.8G, K92.0-K92.2, N02, R04, R31,    |
| 45 |                                       | S06.4-S06.6, S36.8D                            |
| 46 |                                       |                                                |
| 47 |                                       |                                                |
| 48 |                                       |                                                |
| 49 |                                       |                                                |
| 50 |                                       |                                                |
| 51 | Thromboembolic event                  | ICD-10: G45.8, G45.9, I63, I64, I74            |
| 52 |                                       |                                                |
| 53 | Valvular atrial fibrillation          | Atrial fibrillation without:                   |
| 54 |                                       | ICD-10: I05, I06, I080A, I081A, I082A, I083A,  |
| 55 |                                       | Z952, Z954                                     |
| 56 |                                       | ICD-8: 39500-39502, 39508, 39509, 39600-       |
| 57 |                                       | 39604, 39608, 39609                            |
| 58 |                                       | Procedures: FKD, FKH, FMD, FMH, FGE, FJE       |
| 59 | <b>Pharmacotherapy</b>                | <b>ACT-codes</b>                               |
| 60 |                                       |                                                |

1  
2  
3  
4  
5  
6  
7  
8  
9  
10  
11  
12  
13  
14  
15  
16  
17  
18  
19  
20  
21  
22  
23  
24  
25  
26  
27  
28  
29  
30  
31  
32  
33  
34  
35  
36  
37  
38  
39  
40  
41  
42  
43  
44  
45  
46  
47  
48  
49  
50  
51  
52  
53  
54  
55  
56  
57  
58  
59  
60

|                                     |                                                                                                                       |
|-------------------------------------|-----------------------------------------------------------------------------------------------------------------------|
| ADP-receptor blockers               | B01AC04, B01AC22, B01AC24                                                                                             |
| Amiodarone                          | C01BD01                                                                                                               |
| Antiadrenergic agents               | C02A, C02B, C02C                                                                                                      |
| Oral anticoagulation therapy        | Vitamin K antagonists: B01AA03, B01AA04<br>Non-vitamin K antagonist oral anticoagulants:<br>B01AF01, B01AF02, B01AE07 |
| Beta-blockers                       | C07A, C07B, C07C, C07D, C07F                                                                                          |
| Calcium channel blockers            | C08, C09BB, C09DB                                                                                                     |
| Digoxin                             | C01AA                                                                                                                 |
| Flecainide                          | C01BC                                                                                                                 |
| Loop diuretics                      | C03C, C03EB                                                                                                           |
| Non-loop diuretics                  | C02DA, C03EA, C03EB, C02L, C03A, C03B,<br>C03D, C03E, C03X, C07B, C07C, C07D, C08G,<br>C09BA, C09DA, C09XA52          |
| Renin-angiotensin system inhibitors | C09AA, C09BA, C09BB, C09CA, C09DA,<br>C09DB, C09XA02, C09XA52                                                         |
| Vasodilators                        | C02DB, C02DD, C02DG                                                                                                   |

**Online Table 2: Baseline characteristics of the non-matched population, patients initiated on OAC therapy**

|                                                      | Secondary AF<br>N=10,673        |                               |                                    |                   |                     |                          | Primary AF<br>N=37,827 |
|------------------------------------------------------|---------------------------------|-------------------------------|------------------------------------|-------------------|---------------------|--------------------------|------------------------|
|                                                      | Alcohol<br>intoxication<br>N=33 | Thyro-<br>toxicosis<br>N=1103 | Myocardial<br>infarction<br>N=1312 | Surgery<br>N=1151 | Infection<br>N=5987 | >1 precipitant<br>N=1087 |                        |
| <b>Demographics</b>                                  |                                 |                               |                                    |                   |                     |                          |                        |
| Age, median (IQR*)                                   | 64 (55-68)                      | 72 (64-79)                    | 75 (68-81)                         | 74 (67-81)        | 77 (69-83)          | 75 (68-81)               | 72 (64-79)             |
| Male, n (%)                                          | 28 (84.8)                       | 259 (23.5)                    | 842 (64.2)                         | 667 (57.9)        | 3189 (53.3)         | 634 (58.3)               | 21,386 (56.5)          |
| <b>Comorbidities, n (%)</b>                          |                                 |                               |                                    |                   |                     |                          |                        |
| Cancer                                               | ≤ 3                             | 114 (10.3)                    | 146 (11.1)                         | 239 (20.8)        | 927 (15.5)          | 171 (15.1)               | 4617 (12.2)            |
| Chronic kidney disease                               | 4 (12.1)                        | 23 (2.1)                      | 62 (4.7)                           | 65 (5.6)          | 372 (6.2)           | 59 (5.4)                 | 1011 (2.7)             |
| COPD†                                                | ≤ 3                             | 106 (9.6)                     | 133 (10.1)                         | 128 (11.1)        | 1251 (20.9)         | 157 (14.4)               | 3426 (9.1)             |
| Diabetes                                             | ≤ 3                             | 84 (7.6)                      | 159 (12.1)                         | 111 (9.6)         | 712 (11.9)          | 112 (10.3)               | 3384 (8.9)             |
| Heart failure                                        | 6 (18.2)                        | 236 (21.4)                    | 464 (35.4)                         | 228 (19.8)        | 1440 (24.1)         | 359 (33.0)               | 6791 (18.0)            |
| Hypertension                                         | 11 (33.3)                       | 658 (59.7)                    | 982 (74.8)                         | 687 (59.7)        | 3652 (61.0)         | 723 (66.5)               | 23,057 (61.0)          |
| IHD‡                                                 | 5 (15.2)                        | 129 (11.7)                    | 1312 (100)                         | 434 (37.7)        | 1202 (20.1)         | 744 (68.4)               | 7360 (19.5)            |
| PAD§                                                 | ≤ 3                             | 29 (2.6)                      | 83 (6.3)                           | 101 (8.8)         | 353 (5.9)           | 77 (7.1)                 | 1258 (3.3)             |
| Prior bleeding event                                 | 7 (21.2)                        | 86 (7.8)                      | 150 (11.4)                         | 213 (18.5)        | 966 (16.1)          | 182 (16.7)               | 4564 (12.1)            |
| Prior thromboembolic event                           | ≤ 3                             | 60 (5.4)                      | 142 (10.8)                         | 153 (13.3)        | 672 (11.2)          | 133 (12.2)               | 3313 (8.8)             |
| <b>Risk scores</b>                                   |                                 |                               |                                    |                   |                     |                          |                        |
| CHA <sub>2</sub> DS <sub>2</sub> -VASC <sup>  </sup> |                                 |                               |                                    |                   |                     |                          |                        |
| Median (IQR*)                                        | 1 (0-2)                         | 3 (2-4)                       | 4 (3-5)                            | 3 (2-4)           | 3 (2-4)             | 4 (3-5)                  | 3 (2-4)                |
| 0                                                    | 11 (33.3)                       | 134 (12.2)                    | 0                                  | 74 (6.4)          | 269 (4.5)           | 28 (2.6)                 | 3592 (9.5)             |
| 1-2                                                  | 16 (48.5)                       | 263 (23.8)                    | 181 (13.8)                         | 289 (25.1)        | 1493 (24.9)         | 181 (16.6)               | 12,341 (32.6)          |
| ≥3                                                   | 6 (18.2)                        | 706 (64.0)                    | 1131 (86.2)                        | 788 (68.5)        | 4225 (70.6)         | 878 (80.8)               | 21,894 (57.9)          |
| HAS-BLED <sup>#</sup>                                |                                 |                               |                                    |                   |                     |                          |                        |
| Median (IQR*)                                        | 2 (1-3)                         | 2 (1-2)                       | 3 (2-3)                            | 2 (1-3)           | 2 (1-3)             | 2 (2-3)                  | 2 (1-3)                |
| 0                                                    | 0                               | 128 (11.6)                    | 32 (2.4)                           | 60 (5.2)          | 259 (4.3)           | 33 (3.0)                 | 3361 (8.9)             |
| 1-2                                                  | 21 (63.6)                       | 706 (64.0)                    | 571 (43.5)                         | 611 (53.1)        | 3433 (57.3)         | 515 (47.4)               | 22,792 (60.3)          |
| ≥3                                                   | 12 (36.4)                       | 269 (24.4)                    | 709 (54.0)                         | 480 (41.7)        | 2295 (38.3)         | 539 (49.6)               | 11,674 (30.9)          |
| <b>Pharmacotherapy, n (%)</b>                        |                                 |                               |                                    |                   |                     |                          |                        |
| Amiodarone                                           | 0                               | 19 (1.7)                      | 104 (7.9)                          | 181 (15.7)        | 261 (4.4)           | 141 (13.0)               | 1493 (3.9)             |

|            |           |            |            |            |             |            |               |
|------------|-----------|------------|------------|------------|-------------|------------|---------------|
| Digoxin    | 11 (33.3) | 605 (54.9) | 437 (33.3) | 312 (27.1) | 2847 (47.6) | 368 (33.9) | 14,803 (39.1) |
| Flecainide | 0         | 5 (0.5)    | ≤ 3        | ≤ 3        | 10 (0.2)    | ≤ 3        | 248 (0.7)     |

\*IQR: interquartile range. †COPD: chronic obstructive pulmonary disease. ‡IHD: ischemic heart disease. §PAD: peripheral artery disease. ||CHA<sub>2</sub>DS<sub>2</sub>-VASc: Risk score for stroke: congestive heart failure/LV function, hypertension, age 65-74 years, age>74 years (2 points), diabetes, stroke/TIA/systemic embolism (2 points), vascular disease, sex category (female); #HAS-BLED: Risk score for bleeding: hypertension, abnormal renal/liver function, history of stroke, history of bleeding, INR (left out due to missing data), age>65 years, drug consumption with antiplatelet agents/non-steroidal inflammatory drugs, alcohol abuse.

For peer review only



**Online Table 3: Baseline characteristics of the non-matched population, patients not initiated on OAC therapy**

|                                                      | Secondary AF<br>N=29,403         |                               |                                    |                   |                       |                          | Primary AF<br>N=60,361 |
|------------------------------------------------------|----------------------------------|-------------------------------|------------------------------------|-------------------|-----------------------|--------------------------|------------------------|
|                                                      | Alcohol<br>intoxication<br>N=302 | Thyro-<br>toxicosis<br>N=1408 | Myocardial<br>infarction<br>N=3508 | Surgery<br>N=4101 | Infection<br>N=16,079 | >1 precipitant<br>N=4005 |                        |
| <b>Demographics</b>                                  |                                  |                               |                                    |                   |                       |                          |                        |
| Age, median (IQR*)                                   | 58 (48-66)                       | 74 (62-82)                    | 78 (69-84)                         | 76 (67-82)        | 80 (72-87)            | 76 (68-83)               | 69 (58-80)             |
| Male, n (%)                                          | 248 (82.1)                       | 263 (18.7)                    | 1907 (54.4)                        | 2069 (50.5)       | 7352 (45.7)           | 2073 (51.8)              | 31,074 (51.5)          |
| <b>Comorbidities, n (%)</b>                          |                                  |                               |                                    |                   |                       |                          |                        |
| Cancer                                               | 15 (5.0)                         | 174 (12.4)                    | 454 (12.9)                         | 1115 (27.2)       | 3474 (21.6)           | 795 (19.9)               | 7915 (13.1)            |
| Chronic kidney disease                               | 7 (2.3)                          | 38 (2.7)                      | 236 (6.7)                          | 289 (7.0)         | 1223 (7.6)            | 375 (9.4)                | 1733 (2.9)             |
| COPD†                                                | 26 (8.6)                         | 128 (9.1)                     | 495 (14.1)                         | 539 (13.1)        | 3493 (21.7)           | 765 (19.1)               | 4544 (7.5)             |
| Diabetes                                             | 24 (7.9)                         | 105 (7.5)                     | 417 (11.9)                         | 396 (9.7)         | 1473 (9.2)            | 387 (9.7)                | 3566 (5.9)             |
| Heart failure                                        | 18 (6.0)                         | 209 (14.8)                    | 1218 (34.7)                        | 744 (18.1)        | 3752 (23.3)           | 1231 (30.7)              | 6328 (10.5)            |
| Hypertension                                         | 53 (17.5)                        | 653 (46.4)                    | 2348 (66.9)                        | 1808 (44.1)       | 6942 (43.2)           | 1991 (49.7)              | 22,309 (37.0)          |
| IHD‡                                                 | 38 (12.6)                        | 207 (14.7)                    | 3508 (100)                         | 1326 (32.3)       | 3558 (22.1)           | 2354 (58.8)              | 11,528 (19.1)          |
| PAD§                                                 | 6 (2.0)                          | 49 (3.5)                      | 298 (8.5)                          | 371 (9.0)         | 1057 (6.6)            | 374 (9.3)                | 1913 (3.2)             |
| Prior bleeding event                                 | 74 (24.5)                        | 157 (11.2)                    | 585 (16.7)                         | 1062 (25.9)       | 3420 (21.3)           | 998 (24.9)               | 7616 (12.6)            |
| Prior thromboembolic event                           | 22 (7.3)                         | 78 (5.5)                      | 350 (10.0)                         | 422 (10.3)        | 2029 (12.6)           | 478 (11.9)               | 4301 (7.1)             |
| <b>Risk scores</b>                                   |                                  |                               |                                    |                   |                       |                          |                        |
| CHA <sub>2</sub> DS <sub>2</sub> -VASc <sup>  </sup> |                                  |                               |                                    |                   |                       |                          |                        |
| Median (IQR*)                                        | 1 (0-2)                          | 3 (2-4)                       | 4 (3-5)                            | 3 (2-4)           | 3 (2-4)               | 4 (2-5)                  | 2 (0-4)                |
| 0                                                    | 147 (48.7)                       | 271 (19.2)                    | 0                                  | 317 (7.7)         | 1059 (6.6)            | 241 (6.0)                | 15,957 (26.4)          |
| 1-2                                                  | 102 (33.8)                       | 270 (19.2)                    | 489 (13.9)                         | 1119 (27.3)       | 3671 (22.8)           | 824 (20.6)               | 17,513 (29.0)          |
| ≥3                                                   | 53 (17.5)                        | 867 (61.6)                    | 3019 (86.1)                        | 2665 (65.0)       | 11,349 (70.6)         | 2940 (73.4)              | 26,891 (44.6)          |
| HAS-BLED <sup>#</sup>                                |                                  |                               |                                    |                   |                       |                          |                        |
| Median (IQR*)                                        | 2 (1-3)                          | 2 (1-3)                       | 3 (2-3)                            | 2 (1-3)           | 2 (1-3)               | 2 (2-3)                  | 2 (1-3)                |
| 0                                                    | 0                                | 228 (16.2)                    | 102 (2.9)                          | 229 (5.6)         | 745 (4.6)             | 175 (4.4)                | 12,875 (21.3)          |
| 1-2                                                  | 211 (69.9)                       | 756 (53.7)                    | 1424 (40.6)                        | 2265 (55.2)       | 8795 (54.7)           | 1924 (48.0)              | 31,914 (52.9)          |
| ≥3                                                   | 91 (30.1)                        | 424 (30.1)                    | 1982 (56.5)                        | 1607 (39.2)       | 6539 (40.7)           | 1906 (47.6)              | 15,572 (25.8)          |
| <b>Pharmacotherapy, n (%)</b>                        |                                  |                               |                                    |                   |                       |                          |                        |

|            |           |            |            |            |             |            |               |
|------------|-----------|------------|------------|------------|-------------|------------|---------------|
| Amiodarone | ≤ 3       | 14 (1.0)   | 259 (7.4)  | 262 (6.4)  | 361 (2.2)   | 278 (6.9)  | 1133 (1.9)    |
| Digoxin    | 38 (12.6) | 398 (28.3) | 784 (22.3) | 782 (19.1) | 5210 (32.4) | 828 (20.7) | 10,336 (17.1) |
| Flecainide | 0         | 8 (0.6)    | 8 (0.2)    | 10 (0.2)   | 30 (0.2)    | 5 (0.1)    | 786 (1.3)     |

\*IQR: interquartile range. †COPD: chronic obstructive pulmonary disease. ‡IHD: ischemic heart disease. §PAD: peripheral artery disease. ||CHA<sub>2</sub>DS<sub>2</sub>-VASc: Risk score for stroke: congestive heart failure/LV function, hypertension, age 65-74 years, age>74 years (2 points), diabetes, stroke/TIA/systemic embolism (2 points), vascular disease, sex category (female); #HAS-BLED: Risk score for bleeding: hypertension, abnormal renal/liver function, history of stroke, history of bleeding, INR (left out due to missing data), age>65 years, drug consumption with antiplatelet agents/non-steroidal inflammatory drugs, alcohol abuse.

For peer review only

1  
2  
3  
4  
5  
6  
7  
8  
9  
10  
11  
12  
13  
14  
15  
16  
17  
18  
19  
20  
21  
22  
23  
24  
25  
26  
27  
28  
29  
30  
31  
32  
33  
34  
35  
36  
37  
38  
39  
40  
41  
42  
43  
44  
45  
46  
47  
48  
49  
50  
51  
52  
53  
54  
55  
56  
57  
58  
59  
60

## STROBE Statement—checklist of items that should be included in reports of observational studies

|                              | Item No | Recommendation                                                                                                                                                                                                                                                                                                                                                                                                                                                                                                                                                                                                                                                                                                                     |
|------------------------------|---------|------------------------------------------------------------------------------------------------------------------------------------------------------------------------------------------------------------------------------------------------------------------------------------------------------------------------------------------------------------------------------------------------------------------------------------------------------------------------------------------------------------------------------------------------------------------------------------------------------------------------------------------------------------------------------------------------------------------------------------|
| <b>Title and abstract</b>    | 1       | (a) Indicate the study's design with a commonly used term in the title or the abstract<br>YES, p.1 and 3.<br><br>(b) Provide in the abstract an informative and balanced summary of what was done and what was found<br>YES, p. 3.                                                                                                                                                                                                                                                                                                                                                                                                                                                                                                 |
| <b>Introduction</b>          |         |                                                                                                                                                                                                                                                                                                                                                                                                                                                                                                                                                                                                                                                                                                                                    |
| Background/rationale         | 2       | Explain the scientific background and rationale for the investigation being reported<br>YES, p. 5                                                                                                                                                                                                                                                                                                                                                                                                                                                                                                                                                                                                                                  |
| Objectives                   | 3       | State specific objectives, including any prespecified hypotheses<br>YES, p. 5                                                                                                                                                                                                                                                                                                                                                                                                                                                                                                                                                                                                                                                      |
| <b>Methods</b>               |         |                                                                                                                                                                                                                                                                                                                                                                                                                                                                                                                                                                                                                                                                                                                                    |
| Study design                 | 4       | Present key elements of study design early in the paper<br>YES, p. 5-7.                                                                                                                                                                                                                                                                                                                                                                                                                                                                                                                                                                                                                                                            |
| Setting                      | 5       | Describe the setting, locations, and relevant dates, including periods of recruitment, exposure, follow-up, and data collection<br>YES, p. 5-7.                                                                                                                                                                                                                                                                                                                                                                                                                                                                                                                                                                                    |
| Participants                 | 6       | (a) <i>Cohort study</i> —Give the eligibility criteria, and the sources and methods of selection of participants. Describe methods of follow-up<br>YES, p. 6-7.<br><i>Case-control study</i> —Give the eligibility criteria, and the sources and methods of case ascertainment and control selection. Give the rationale for the choice of cases and controls<br><i>Cross-sectional study</i> —Give the eligibility criteria, and the sources and methods of selection of participants<br><br>(b) <i>Cohort study</i> —For matched studies, give matching criteria and number of exposed and unexposed<br>YES, p. 8.<br><i>Case-control study</i> —For matched studies, give matching criteria and the number of controls per case |
| Variables                    | 7       | Clearly define all outcomes, exposures, predictors, potential confounders, and effect modifiers. Give diagnostic criteria, if applicable<br>YES, p. 7-8. Figure 3. Specification of diagnosis can be found in the Online Table 1.                                                                                                                                                                                                                                                                                                                                                                                                                                                                                                  |
| Data sources/<br>measurement | 8*      | For each variable of interest, give sources of data and details of methods of assessment (measurement). Describe comparability of assessment methods if there is more than one group<br>YES, p. 5-6 and eTable 1.                                                                                                                                                                                                                                                                                                                                                                                                                                                                                                                  |
| Bias                         | 9       | Describe any efforts to address potential sources of bias<br>YES, p. 8.                                                                                                                                                                                                                                                                                                                                                                                                                                                                                                                                                                                                                                                            |
| Study size                   | 10      | Explain how the study size was arrived at<br>YES, p. 6-7, figure 1.                                                                                                                                                                                                                                                                                                                                                                                                                                                                                                                                                                                                                                                                |
| Quantitative variables       | 11      | Explain how quantitative variables were handled in the analyses. If applicable, describe which groupings were chosen and why                                                                                                                                                                                                                                                                                                                                                                                                                                                                                                                                                                                                       |

1  
2  
3  
4  
5  
6  
7  
8  
9  
10  
11  
12  
13  
14  
15  
16  
17  
18  
19  
20  
21  
22  
23  
24  
25  
26  
27  
28  
29  
30  
31  
32  
33  
34  
35  
36  
37  
38  
39  
40  
41  
42  
43  
44  
45  
46  
47  
48  
49  
50  
51  
52  
53  
54  
55  
56  
57  
58  
59  
60

YES, p. 6-7.

Statistical methods

12

(a) Describe all statistical methods, including those used to control for confounding

YES, p. 7-8.

(b) Describe any methods used to examine subgroups and interactions

YES, p. 7-8.

(c) Explain how missing data were addressed

No missing data

(d) *Cohort study*—If applicable, explain how loss to follow-up was addressed

No loss to follow-up.

*Case-control study*—If applicable, explain how matching of cases and controls was addressed

*Cross-sectional study*—If applicable, describe analytical methods taking account of sampling strategy

(e) Describe any sensitivity analyses

YES, p. 7.

Continued on next page

1  
2  
3  
4  
5  
6  
7  
8  
9  
10  
11  
12  
13  
14  
15  
16  
17  
18  
19  
20  
21  
22  
23  
24  
25  
26  
27  
28  
29  
30  
31  
32  
33  
34  
35  
36  
37  
38  
39  
40  
41  
42  
43  
44  
45  
46  
47  
48  
49  
50  
51  
52  
53  
54  
55  
56  
57  
58  
59  
60

## Results

|                          |     |                                                                                                                                                                                                                                |
|--------------------------|-----|--------------------------------------------------------------------------------------------------------------------------------------------------------------------------------------------------------------------------------|
| Participants             | 13* | (a) Report numbers of individuals at each stage of study—eg numbers potentially eligible, examined for eligibility, confirmed eligible, included in the study, completing follow-up, and analysed<br>YES, p. 8-9 and Figure 1. |
|                          |     | (b) Give reasons for non-participation at each stage<br>YES, p. 8-9 and Figure 1.                                                                                                                                              |
|                          |     | (c) Consider use of a flow diagram<br>YES, Figure 1                                                                                                                                                                            |
| Descriptive data         | 14* | (a) Give characteristics of study participants (eg demographic, clinical, social) and information on exposures and potential confounders<br>YES, p. 9, Table 1.                                                                |
|                          |     | (b) Indicate number of participants with missing data for each variable of interest<br>No missing data                                                                                                                         |
|                          |     | (c) <i>Cohort study</i> —Summarise follow-up time (eg, average and total amount)<br>YES, Figure 2.                                                                                                                             |
| Outcome data             | 15* | <i>Cohort study</i> —Report numbers of outcome events or summary measures over time<br>YES, p. 10 and Figure 2, 3.                                                                                                             |
|                          |     | <i>Case-control study</i> —Report numbers in each exposure category, or summary measures of exposure                                                                                                                           |
|                          |     | <i>Cross-sectional study</i> —Report numbers of outcome events or summary measures                                                                                                                                             |
| Main results             | 16  | (a) Give unadjusted estimates and, if applicable, confounder-adjusted estimates and their precision (eg, 95% confidence interval). Make clear which confounders were adjusted for and why they were included<br>YES, Figure 3. |
|                          |     | (b) Report category boundaries when continuous variables were categorized<br>Continuous variables were not categorized.                                                                                                        |
|                          |     | (c) If relevant, consider translating estimates of relative risk into absolute risk for a meaningful time period                                                                                                               |
| Other analyses           | 17  | Report other analyses done—eg analyses of subgroups and interactions, and sensitivity analyses<br>YES, p. 11.                                                                                                                  |
| <b>Discussion</b>        |     |                                                                                                                                                                                                                                |
| Key results              | 18  | Summarise key results with reference to study objectives<br>YES, p. 11.                                                                                                                                                        |
| Limitations              | 19  | Discuss limitations of the study, taking into account sources of potential bias or imprecision. Discuss both direction and magnitude of any potential bias<br>YES, p. 13-14.                                                   |
| Interpretation           | 20  | Give a cautious overall interpretation of results considering objectives, limitations, multiplicity of analyses, results from similar studies, and other relevant evidence<br>YES, p. 12-13.                                   |
| Generalisability         | 21  | Discuss the generalisability (external validity) of the study results<br>YES, p. 14.                                                                                                                                           |
| <b>Other information</b> |     |                                                                                                                                                                                                                                |
| Funding                  | 22  | Give the source of funding and the role of the funders for the present study and, if applicable, for the original study on which the present article is based                                                                  |

1  
2 YES, p. 14.  
3

4 \*Give information separately for cases and controls in case-control studies and, if applicable, for exposed and  
5 unexposed groups in cohort and cross-sectional studies.  
6  
7

8 **Note:** An Explanation and Elaboration article discusses each checklist item and gives methodological background and  
9 published examples of transparent reporting. The STROBE checklist is best used in conjunction with this article (freely  
10 available on the Web sites of PLoS Medicine at <http://www.plosmedicine.org/>, Annals of Internal Medicine at  
11 <http://www.annals.org/>, and Epidemiology at <http://www.epidem.com/>). Information on the STROBE Initiative is  
12 available at [www.strobe-statement.org](http://www.strobe-statement.org).  
13  
14  
15  
16  
17  
18  
19  
20  
21  
22  
23  
24  
25  
26  
27  
28  
29  
30  
31  
32  
33  
34  
35  
36  
37  
38  
39  
40  
41  
42  
43  
44  
45  
46  
47  
48  
49  
50  
51  
52  
53  
54  
55  
56  
57  
58  
59  
60

# BMJ Open

## Comparative thromboembolic risk in atrial fibrillation with and without a secondary precipitant– a Danish nationwide cohort study

|                                 |                                                                                                                                                                                                                                                                                                                                                                                                                                                                                                                                                                                                                                                 |
|---------------------------------|-------------------------------------------------------------------------------------------------------------------------------------------------------------------------------------------------------------------------------------------------------------------------------------------------------------------------------------------------------------------------------------------------------------------------------------------------------------------------------------------------------------------------------------------------------------------------------------------------------------------------------------------------|
| Journal:                        | <i>BMJ Open</i>                                                                                                                                                                                                                                                                                                                                                                                                                                                                                                                                                                                                                                 |
| Manuscript ID                   | bmjopen-2018-028468.R1                                                                                                                                                                                                                                                                                                                                                                                                                                                                                                                                                                                                                          |
| Article Type:                   | Original research                                                                                                                                                                                                                                                                                                                                                                                                                                                                                                                                                                                                                               |
| Date Submitted by the Author:   | 02-May-2019                                                                                                                                                                                                                                                                                                                                                                                                                                                                                                                                                                                                                                     |
| Complete List of Authors:       | Gundlund, A; Herlev and Gentofte Hospital, K umlner, Thomas; Herlev and Gentofte Hospital<br>Bonde, Anders; Herlev and Gentofte Hospital<br>Butt, Jawad; Rigshospitalet, Department of Cardiology<br>Gislason, Gunnar; Herlev and Gentofte Hospital<br>Torp-Pedersen, Christian; Aalborg University, Department of Health Science and Technology; Aalborg University Hospital , Department of Clinical Epidemiology<br>K ober, Lars; Rigshospitalet, Department of Cardiology - The Heart Centre<br>Olesen, Jonas; Copenhagen University Hospital Gentofte, Department of Cardiology<br>Fosb øl, Emil; Rigshospitalet, Department of Cardiology |
| <b>Primary Subject Heading</b>: | Cardiovascular medicine                                                                                                                                                                                                                                                                                                                                                                                                                                                                                                                                                                                                                         |
| Secondary Subject Heading:      | Epidemiology                                                                                                                                                                                                                                                                                                                                                                                                                                                                                                                                                                                                                                    |
| Keywords:                       | Cardiac Epidemiology < CARDIOLOGY, Thromboembolism < CARDIOLOGY, Pacing & electrophysiology < CARDIOLOGY                                                                                                                                                                                                                                                                                                                                                                                                                                                                                                                                        |
|                                 |                                                                                                                                                                                                                                                                                                                                                                                                                                                                                                                                                                                                                                                 |

SCHOLARONE™  
Manuscripts

1  
2  
3  
4 1 **Comparative thromboembolic risk in atrial fibrillation with and without a**  
5  
6  
7 2 **secondary precipitant– a Danish nationwide cohort study**  
8

9  
10 3 Anna Gundlund<sup>1</sup>, MD, PhD; Thomas Kümler<sup>2</sup>, MD, PhD; Anders Nissen Bonde<sup>1</sup>, MD; Jawad H.  
11  
12 4 Butt, MD<sup>6</sup>; Gunnar H. Gislason<sup>1,3,4</sup>, MD, PhD; Christian Torp-Pedersen<sup>5</sup>, MD, DMSc; Lars Køber<sup>6</sup>,  
13  
14 5 MD, DMSc; Jonas Bjerring Olesen<sup>1</sup>, MD, PhD; Emil Loldrup Fosbøl<sup>6</sup>, MD, PhD  
15  
16 6

17  
18  
19 7 **Institution**

20  
21 8 Department of Cardiology, Research Unit 1, Copenhagen University Hospital Herlev-Gentofte,  
22  
23 9 Kildegaardsvej 28, 2900 Hellerup, Denmark  
24  
25

26 10  
27  
28 11 **Affiliations**

29  
30 12 1: Department of Cardiology, Research Unit 1, Copenhagen University Hospital Herlev-Gentofte,  
31  
32 13 Hellerup, Denmark  
33  
34

35 14 2: Department of Cardiology, Copenhagen University Hospital Herlev-Gentofte, Herlev, Denmark  
36

37 15 3: The Danish Heart Foundation, Copenhagen, Denmark  
38

39 16 4: The National Institute of Public Health, University of Southern Denmark  
40

41  
42 17 5: Department of Health, Science and Technology, Aalborg University and departments of  
43  
44 18 Cardiology and Epidemiology/Biostatistics, Aalborg University Hospital, Denmark  
45

46  
47 19 6: Department of Cardiology, University Hospital of Copenhagen, Rigshospitalet  
48  
49 20

50  
51  
52 21 **Corresponding author:**

53  
54 22 Anna Gundlund, MD, PhD

55  
56 23 Department of Cardiology, Research Unit 1, Copenhagen University Hospital Herlev-Gentofte,  
57  
58 24 Hellerup, Denmark, Post 635  
59  
60



1  
2  
3  
4 1 Tel: 0045 50907119  
5

6 2 FAX: 38677642  
7

8  
9 3 Email: annagundlund@gmail.com  
10  
11  
12  
13  
14  
15  
16  
17  
18  
19  
20  
21  
22  
23  
24  
25  
26  
27  
28  
29  
30  
31  
32  
33  
34  
35  
36  
37  
38  
39  
40  
41  
42  
43  
44  
45  
46  
47  
48  
49  
50  
51  
52  
53  
54  
55  
56  
57  
58  
59  
60

For peer review only

1  
2  
3  
4 1 **Abstract:** 292 words (max 300 words)  
5

6 2 Objectives: We compared long-term outcomes in patients with atrial fibrillation (AF) with and  
7  
8  
9 3 without a secondary precipitant.  
10

11 4 Design and setting: Retrospective cohort study based on Danish nationwide registries.  
12

13 5 Participants: Patients with AF with and without secondary precipitants (1996-2015) were matched  
14  
15  
16 6 1:1 according to age, sex, calendar year, CHA<sub>2</sub>DS<sub>2</sub>-VASc score, and oral anticoagulation therapy  
17  
18 7 (OAC) therapy, resulting in a cohort of 39,723 patients with AF with a secondary precipitant and  
19  
20 8 the same number of patients with AF without a secondary precipitant. Secondary precipitants  
21  
22  
23 9 included alcohol intoxication, thyrotoxicosis, myocardial infarction, surgery, and infection in  
24  
25 10 conjunction with AF.  
26

27 11 Primary and secondary outcomes: The primary outcome in this study was thromboembolic events.  
28  
29  
30 12 Secondary outcomes included AF re-hospitalization and death. Long-term risks of outcomes were  
31  
32 13 examined by multivariable Cox regression analysis.  
33

34 14 Results: The most common precipitants were infection (55.0%), surgery (13.2%), and myocardial  
35  
36 15 infarction (12.0%). The 5-year absolute risk of thromboembolic events (taking death into account as  
37  
38  
39 16 a competing risk) in patients with AF grouped according to secondary precipitant were 8.3%  
40  
41 17 (alcohol intoxication), 8.5% (thyrotoxicosis), 12.1% (myocardial infarction), 11.6% (surgery),  
42  
43 18 12.2% (infection), 10.1% (>1 precipitant), and 12.3% (no secondary precipitant). In the  
44  
45  
46 19 multivariable analyses, AF with a secondary precipitant was associated with the same or an even  
47  
48 20 higher thromboembolic risk than AF without a secondary precipitant. One exception was patients  
49  
50 21 with AF and thyrotoxicosis: those not initiated on OAC therapy carried a lower thromboembolic  
51  
52 22 risk the 1<sup>st</sup> year of follow up than matched patients with AF without a secondary precipitant and no  
53  
54  
55 23 OAC therapy.  
56  
57  
58  
59  
60

1  
2  
3  
4 1 Conclusions: In general, AF with a secondary precipitant was associated with the same  
5  
6 2 thromboembolic risk as AF without a secondary precipitant. Consequently, this study highlights the  
7  
8 3 need for more research regarding the long-term management of patients with AF associated with a  
9  
10 4 secondary precipitant.  
11  
12

13 5 Key words: Secondary precipitant, reversible atrial fibrillation, recurrence  
14  
15  
16 6

17  
18  
19  
20  
21  
22  
23  
24  
25  
26  
27  
28  
29  
30  
31  
32  
33  
34  
35  
36  
37  
38  
39  
40  
41  
42  
43  
44  
45  
46  
47  
48  
49  
50  
51  
52  
53  
54  
55  
56  
57  
58  
59  
60

For peer review only

1  
2  
3  
4 **1 Article summary: strengths and limitations of this study**  
5

- 6  
7 2 • The study was based on high-quality nationwide registries with many years of follow up.  
8  
9 3 • Complete follow-up was possible  
10  
11 4 • Only associations could be drawn because of the retrospective and non-randomized design.  
12  
13  
14 5 • AF with and without a secondary precipitant were defined from diagnosis codes at discharge  
15  
16 6 • We had no data on electrocardiograms at discharge  
17  
18  
19 7

## 1 **Introduction**

2 The aetiology of atrial fibrillation (AF) remains partly unknown. Studies have shown, that an  
3 inflammatory reaction inside the atria always precipitate AF.(1) However, in clinical practice, AF  
4 may occur as an isolated event or together with a secondary precipitant. AF is associated with a  
5 fivefold increased risk of ischemic stroke, and detailed treatment strategies regarding stroke  
6 prophylaxis in patients with AF occurring without secondary precipitants exist in both European  
7 and American treatment guidelines.(2–5)] In contrast, there is no consensus regarding stroke  
8 prophylaxis in patients with AF occurring with a secondary precipitant. Previous guidelines stated  
9 that AF occurring secondary to another precipitant usually will terminate without recurrence.(2) In  
10 current guidelines, however, this statement has been omitted, and the need for data regarding AF  
11 associated with a secondary precipitant highlighted.(4,5) Studies investigating long-term outcomes  
12 in AF associated with a secondary precipitant are sparse and data differentiating between different  
13 secondary precipitants and taking oral anticoagulation (OAC) therapy into account are missing.  
14 To address this lack in current knowledge, we aimed to compare long-term outcomes including  
15 thromboembolic events, AF re-hospitalization, and death in patients with AF with a secondary  
16 precipitant (incl. alcohol, intoxication, thyrotoxicosis, myocardial infarction, surgery, and infection)  
17 and patients with AF without a secondary precipitant. Further, we were able to differentiate  
18 between patients receiving and not receiving stroke prophylaxis with OAC therapy.

## 19 **Materials and methods**

### 20 *Data sources*

21 In Denmark, healthcare is tax-financed and with equal availability regardless of socioeconomic  
22 status. Date of birth, date and cause of death, emigration and immigration status, diagnosis and  
23 surgery codes etc. from all hospital contacts, fulfilled prescriptions of medicine, and several other  
24

1  
2  
3  
4  
5  
6  
7  
8  
9  
10  
11  
12  
13  
14  
15  
16  
17  
18  
19  
20  
21  
22  
23  
24  
25  
26  
27  
28  
29  
30  
31  
32  
33  
34  
35  
36  
37  
38  
39  
40  
41  
42  
43  
44  
45  
46  
47  
48  
49  
50  
51  
52  
53  
54  
55  
56  
57  
58  
59  
60

parameters are registered in different nationwide registries. Since all Danish citizens are provided a unique personal identifier code at birth (or immigration), data from the registries can be crosslinked on an individual level. We linked data from the following registries: The Danish Civil Registration System,(6) The Danish National Patient Registry (diagnoses were registered in terms of the International Classification of Diseases (ICD) system (ICD-8 until 1994 and in terms of ICD-10 thereafter)),(7) The Danish Register of Causes of Death,(8) and the Danish National Registry of Medicinal Statistics (medicine were registered according to the Anatomical Therapeutic Chemical classification system (ATC)).(9)

### *Study population*

The patient selection is depicted in Figure 1. We included all Danes diagnosed and admitted to a hospital with AF for the first time between 1996 and 2015. Patients <18 years or >100 years and those with valvular AF (defined as AF without: rheumatic valve disease of aortic valve or mitral valve or prosthetic heart valve (any valve)) were excluded. Since there was a possibility that some of the patients had been diagnosed with AF at their general practitioner before their hospital admission, we excluded those who previously had fulfilled a prescription of antiarrhythmic therapy or rate-controlling drugs (incl. amiodarone, flecainide, and digoxin) and those who had fulfilled a prescription of OAC therapy up to 100 days before their hospital admission. Further, patients who died or had a thromboembolic event during the hospital admission or a constructed blanking period of 4 weeks from hospital discharge to the index date were excluded.

Patients were grouped in those with and without a secondary precipitant. Patients who had a diagnosis of one of the following precipitants from their AF hospital admission were defined as patients with a secondary precipitant: alcohol intoxication, thyrotoxicosis, myocardial infarction, and infection. Also, patients who were diagnosed with AF after, but during the same hospital

1 admission they received surgery were defined as having AF with a secondary precipitant. We  
2 restricted the population of patients with AF without a secondary precipitant to patients with AF  
3 without a diagnosis of a secondary precipitant from their hospital admission. Patients with AF with  
4 and without a secondary precipitant were matched 1:1 by incidence density sampling according to  
5 age (allowing a difference of up to two years), sex, calendar year (allowing a difference up to two  
6 years), CHA<sub>2</sub>DS<sub>2</sub>-VASc group (0, 1-2, >2) and OAC therapy status at the index date. Consequently,  
7 each case was matched with a control diagnosed at the same time and in the same age with AF.  
8 Further, the control had the same sex and was categorized in the same CHA<sub>2</sub>DS<sub>2</sub>-VASc group as  
9 the case. These patients comprised the study population. We used a previously described function to  
10 perform the match.(10)

### 11 12 *Long-term outcomes*

13 The index date was defined 4 weeks from AF hospital discharge. Initiation of OAC therapy and  
14 antiarrhythmic and rate controlling drugs was assessed during this blanking period from discharge  
15 to index date. Patients were followed from the index date and until the first event of the following:  
16 an outcome of interest, death, 5 years from the index date, emigration, or June 30, 2015. The  
17 primary outcome of interest was thromboembolic events (a composite of ischemic stroke, transient  
18 ischemic attack (TIA), and systemic thrombosis or embolism) while secondary outcomes included  
19 AF re-hospitalization and all-cause death. AF-rehospitalization was defined as a hospitalization  
20 with AF as the primary discharge diagnosis. The diagnoses of AF, ischemic stroke, and myocardial  
21 infarction have been validated in the Danish registries with positive predictive values of 93%, 97%,  
22 and 100%, respectively.(11,12)

## 1 2 3 4 1 *Statistics*

5  
6 2 Kaplan Meier curves for death were drawn and cumulative incidences of thromboembolic events  
7  
8 3 (with incorporated competing risk of death) calculated using the Aalen Johansen estimator. The  
9  
10 4 Log-Rank test and the Gray's test were used to test for differences in the cumulative incidence of  
11  
12 5 long-term outcomes. Cox regression analyses were performed to calculate hazard ratios (HR) of  
13  
14 6 long-term outcomes in patients with AF with and without a secondary precipitant according to OAC  
15  
16 7 therapy at the index date. All analyzes were performed on the matched population. The multivariate  
17  
18 8 models were adjusted for other potential confounders than the matching criteria (incl. comorbidities  
19  
20 9 at the index date (incl. peripheral artery disease, heart failure, hypertension, prior thromboembolic  
21  
22 10 event, ischemic heart disease, chronic kidney disease, diabetes, prior bleeding event, cancer) and  
23  
24 11 antiarrhythmic and rate-controlling therapy during the blanking period (amiodarone, digoxin,  
25  
26 12 flecainide)). The analyses took matching variables into account and each group of patients with AF  
27  
28 13 with a secondary precipitant was compared with its respective matches from the matching  
29  
30 14 procedure. The models were tested for the assumption of proportional hazards. For specification of  
31  
32 15 diagnosis codes and ATC-codes please see Online Table 1. A P-value <0.05 was considered  
33  
34 16 statistically significant. All statistical analyses were performed in SAS statistical software version  
35  
36 17 9.4 or R.(13)  
37  
38  
39  
40  
41  
42  
43  
44

## 45 19 *Other analyses*

46  
47 20 Analyses of long-term outcomes were also performed on a non-matched population including all  
48  
49 21 patients available before the matching (Figure 1). To account for changes in OAC therapy status  
50  
51 22 over time, we did a sensitivity analysis not stratifying patients with regard to their OAC therapy  
52  
53 23 status at the index date, but instead adjusting for OAC therapy status as a time-dependent variable.  
54  
55  
56  
57  
58  
59  
60



1  
2  
3  
4 1 Consequently, new initiations and discontinuations were taking into account. The method used, has  
5  
6 2 been used and described previously.(14–16)  
7  
8

### 9 3 10 11 4 *Ethics*

12  
13 5 Approval from the Research Ethics Committee System is not required in retrospective registry-  
14  
15 6 based studies in Denmark. The Danish Data Protection Agency approved use of data for this study  
16  
17 7 (ret.no: 2007-58-0015 / GEH-2014-013 I-Suite no: 02731).  
18  
19  
20 8

### 21 22 23 9 **Patient and Public Involvement**

24  
25 10 This was a retrospective study based on administrative registries. Patients and the public were not  
26  
27 11 involved in the development of the study.  
28  
29  
30 12

### 31 32 13 **Data availability statement**

33  
34 14 Data in this study are not available for the public.  
35  
36  
37 15

### 38 39 16 **Results**

#### 40 41 17 *Study population*

42  
43 18 As shown in Figure 1, the most common secondary precipitant was infection (21,824 patients,  
44  
45 19 55.0%). Further, 335 (0.8%) patients had a concurrent alcohol intoxication, 2507 (6.3%) had  
46  
47 20 thyrotoxicosis, 4773 (12.0%) had acute myocardial infarction, 5229 (13.2%) had underwent  
48  
49 21 surgery, and 5055 (12.7%) had >1 precipitant. Of those with >1 precipitant, 4788 (94.7%) patients  
50  
51 22 had two secondary precipitants, while 267 (5.3%) had three or four secondary precipitants.  
52  
53 23 Infection and surgery was the most common combination of secondary precipitants. The patients  
54  
55 24 with >1 precipitant were grouped in one group, and were not included in the other groups of  
56  
57  
58  
59  
60

1  
2  
3  
4 1 patients with AF with a secondary precipitant. During the blanking period, 14% of the patients with  
5  
6 2 AF and a secondary precipitant and 2% of the patients with AF without a secondary precipitant  
7  
8 3 died, while 5% and 2%, respectively, had a thromboembolic event. These patients were excluded  
9  
10 4 before the matching.  
11  
12  
13  
14 5

### 16 6 *Baseline characteristics*

17  
18 7 Baseline characteristics of the matched study population are shown in Table 1. In general, patients  
19  
20 8 with AF with a secondary precipitant had more comorbidities than patients with AF without a  
21  
22 9 secondary precipitant. Baseline characteristics of the non-matched population according to OAC  
23  
24 10 therapy at the index date are shown in online Table 2 and 3. Especially those with AF and  
25  
26 11 myocardial infarction, surgery, infection, and >1 precipitant were older, had more comorbidities,  
27  
28 12 and higher risk scores for stroke and bleeding compared with patients with AF without a secondary  
29  
30 13 precipitant. Among the patients with AF with a secondary precipitant (non-matched study  
31  
32 14 population), 9.9% with alcohol intoxication, 43.9% with thyrotoxicosis, 27.2% with myocardial  
33  
34 15 infarction, 21.9% with surgery, 27.1% with infection, and 21.4% with >1 precipitant received OAC  
35  
36 16 therapy at the index date, respectively. Among patients with AF without a secondary precipitant,  
37  
38 17 38.5% received OAC therapy at the index date. In general for patients with AF with and without a  
39  
40 18 secondary precipitant, those initiated on OAC therapy suffered from less cancer, chronic kidney  
41  
42 19 disease, peripheral artery disease, and had fewer previous bleeding events than those not initiated  
43  
44 20 on OAC. On the other hand, they were more likely to suffer from stroke risk factors (incl. diabetes,  
45  
46 21 heart failure, ischemic heart disease, and hypertension) than those not initiated on OAC therapy.  
47  
48  
49  
50  
51  
52  
53 22

### 55 23 *Long-term outcomes*

1  
2  
3  
4 1 Number of events, incidence rates, and crude and adjusted hazard ratios (HRs) of thromboembolic  
5  
6 2 events and death in AF patients with a secondary precipitant compared with AF patients without a  
7  
8  
9 3 secondary precipitant initiated and not initiated on OAC therapy at the index date are presented in  
10  
11 4 Figure 2. With few exceptions, AF with a secondary precipitant was associated with the same  
12  
13 5 thromboembolic risk as AF without a secondary precipitant. Regardless of OAC therapy status at  
14  
15 6 the index date, AF with infection was associated with a significantly increased risk of  
16  
17 7 thromboembolic events compared with AF without a secondary precipitant. Among those not  
18  
19 8 initiated on OAC therapy, AF with thyrotoxicosis was associated with a significantly lower risk of  
20  
21 9 thromboembolic events compared with AF without a secondary precipitant. In those initiated on  
22  
23 10 OAC therapy, no differences in thromboembolic risk was observed between patients with AF and  
24  
25 11 thyrotoxicosis and patients with AF without a secondary precipitant. All subgroups of AF with a  
26  
27 12 secondary precipitant were associated with a significantly lower risk of AF re-hospitalization  
28  
29 13 compared with AF without a secondary precipitant (Figure 2).  
30  
31  
32  
33  
34  
35

36 15 Figure 3 and 4 depicts cumulative incidences of thromboembolic events and death in patients with  
37  
38 16 AF with and without a secondary precipitant. During follow up, the cumulative incidence of  
39  
40 17 thromboembolic events (taking death as an competing risk into account) according to type of  
41  
42 18 secondary precipitant was 8.3% (alcohol intoxication), 8.5% (thyrotoxicosis), 12.1% (myocardial  
43  
44 19 infarction), 11.6% (surgery), 12.2% (infection), 10.1% (>1 precipitant), and 12.3% (no secondary  
45  
46 20 precipitant). The cumulative incidence of AF re-hospitalization were 19.6% (alcohol intoxication),  
47  
48 21 30.8% (thyrotoxicosis), 27.2% (myocardial infarction), 14.8% (surgery), 20.9% (infection), 19.3%  
49  
50 22 (>1 precipitant), and 34.4% (no secondary precipitant) (not included in the figures).  
51  
52  
53  
54

55 23 OAC therapy initiation compared with no OAC therapy initiation was associated with a lower  
56  
57 24 thromboembolic risk in patients with AF with and without a secondary precipitant, although the  
58  
59  
60

1  
2  
3  
4  
5  
6  
7  
8  
9  
10  
11  
12  
13  
14  
15  
16  
17  
18  
19  
20  
21  
22  
23  
24  
25  
26  
27  
28  
29  
30  
31  
32  
33  
34  
35  
36  
37  
38  
39  
40  
41  
42  
43  
44  
45  
46  
47  
48  
49  
50  
51  
52  
53  
54  
55  
56  
57  
58  
59  
60

1 results did not reach statistical significance in patients with AF with alcohol intoxication,  
2 thyrotoxicosis, myocardial infarction, and surgery as secondary precipitants (Figure 5).

3

#### 4 *Other analyses*

5 The long-term risk of thromboembolic events for patients with AF with and without a secondary  
6 precipitant in the non-matched population were comparable to the risks found in the main analysis,  
7 except that AF with thyrotoxicosis reached statistical significance and hence was associated with a  
8 significantly lower risk of thromboembolic events (HR 0.75, 95% CI 0.60-0.95 for those initiated  
9 on OAC therapy and HR 0.77, 95% CI 0.64-0.92 for those not initiated on OAC therapy). Further,  
10 among those initiated on OAC therapy, AF after surgery was associated with an increased risk of  
11 thromboembolic events (HR 1.23, 95% CI 1.01-1.50).

12 The sensitivity analysis, adjusting for OAC therapy status as a time-dependent variable, revealed  
13 result similar to those found in the main analysis (Online Figure 1).

14

## 15 **Discussion**

16 We examined long-term outcomes in patients with AF with and without a secondary precipitant.

17 The study had two main findings: first, AF with different secondary precipitants was in general

18 associated with the same thromboembolic risk as AF without a secondary precipitant. Secondly,

19 OAC initiation-rates differed significantly according to type of secondary precipitant. Further, OAC

20 therapy vs. no OAC therapy were associated with a lower thromboembolic risk in those with AF

21 and infection and >1 precipitant while no significant risk-reduction was seen for patients with AF

22 with the other secondary precipitants.

23

#### 24 *Thromboembolic risk*

1  
2  
3  
4 1 Despite of lower re-hospitalization rates with AF, AF with a secondary precipitant was in general  
5  
6 2 associated with the same thromboembolic risk as AF without a secondary precipitant. AF with  
7  
8 3 thyrotoxicosis was associated with a lower thromboembolic risk compared with AF without a  
9  
10 4 secondary precipitant In contrast, AF with infection was associated with an increased  
11  
12 5 thromboembolic risk compared with AF without a secondary precipitant. This is in accordance with  
13  
14 6 previous findings.(17–19) In two previous studies, Lubitz et al. and Fauchier et al. examined long-  
15  
16 7 term outcomes in patients with AF secondary to a reversible precipitant compared with patients  
17  
18 8 with AF without a secondary precipitant. In both studies, AF secondary to a reversible precipitant  
19  
20 9 was associated with the same thromboembolic risk as AF without secondary precipitants. However,  
21  
22 10 both studies were smaller and with patients included before 2012 and 2010, respectively.(20,21) In  
23  
24 11 summary, our results together with previous studies suggest that AF with a secondary precipitant in  
25  
26 12 general, and maybe with the exception of AF with thyrotoxicosis, may be considered as similar to  
27  
28 13 AF without a secondary precipitant with respect to thromboembolic risk.  
29  
30  
31  
32  
33  
34  
35

### 36 15 *OAC therapy*

37  
38 16 OAC therapy showed a tendency towards a lower thromboembolic risk in AF with a secondary  
39  
40 17 precipitant patients, but did only reach statistical significance for patients with AF and infection and  
41  
42 18 >1 precipitant. Recently, Quon et al. examined risk of thromboembolic events and bleeding in  
43  
44 19 patients with AF and acute coronary syndrome, acute pulmonary disease, and infection according to  
45  
46 20 OAC therapy status after discharge. In that study, OAC therapy was not associated with lower risk  
47  
48 21 of thromboembolic events in patients with AF and the before mentioned precipitants. However, the  
49  
50 22 analyses on long-term outcomes were based on logistic regression analysis, and did therefore not  
51  
52 23 include survival time in the model. Since patients with AF with a secondary precipitant in our study  
53  
54 24 seemed to die at a higher rate than patients with AF without a secondary precipitant, the time  
55  
56  
57  
58  
59  
60

1  
2  
3  
4 1 perspective is crucial when studying long-term outcomes in this setting.(22) Studies with a clinical  
5  
6 2 randomized design would be able to show whether patients with AF with a secondary precipitant  
7  
8  
9 3 benefit from OAC therapy on the same terms as patients with AF without a secondary precipitant.  
10  
11 4

#### 13 5 *OAC treatment-rates*

15 6 The non-matched population allowed us to describe trends in OAC therapy initiation in patients  
17  
18 7 with AF with and without a secondary precipitant. In patients with AF without a secondary  
19  
20 8 precipitant, 38.5% of the patients were initiated on OAC therapy at the index date. This is in  
21  
22 9 accordance with previous findings, taking into account that our study period went back to 1996  
23  
24 10 when treatment rates were lower than today.(23,24) In 2017, Chean et al. assessed current practice  
25  
26 11 of AF among critically ill patients with new-onset AF. The study was based on questionnaires  
27  
28 12 answered by members of the Intensive Care Society in UK. The results revealed that 63.8% of the  
29  
30 13 respondents would not regularly anti-coagulate critically ill patients with new-onset AF. We found  
31  
32 14 important differences in OAC therapy initiation rates in patients with AF with a secondary  
33  
34 15 precipitant according to type of precipitant. Patients with alcohol intoxication had the lowest  
35  
36 16 initiation rate of OAC therapy (9.9%). Almost 50% of this patient group had a CHA<sub>2</sub>DS<sub>2</sub>-VASc  
37  
38 17 score of 0 and hence no indication for OAC therapy. Further patients with alcohol abuse may have  
39  
40 18 poor compliance and increased bleeding risk.(25) Consequently, there may be caution among  
41  
42 19 physicians in prescribing OACs for this patient group. In 2011, Traube and colleagues reviewed the  
43  
44 20 literature with respect to thromboembolic risk in patients with AF and thyrotoxicosis. They  
45  
46 21 concluded that OAC therapy should be initiated for those patients who did not have any  
47  
48 22 contraindications for treatment.(26) This could explain the high OAC treatment initiation rates in  
49  
50 23 this patient group (43.9%).  
51  
52  
53  
54  
55  
56  
57 24  
58  
59  
60

1  
2  
3  
4 1 *Limitations*

5  
6 2 First of all, this study was a retrospective registry-based study and hence no causative relationships  
7  
8 3 can be drawn. Our definition of AF with a secondary precipitant was based on diagnosis codes from  
9  
10 4 hospital admissions with AF and a reversible precipitant. Both diagnoses were registered at the  
11  
12 5 discharge date, and therefore we may have included patients in the the group of AF with a  
13  
14 6 secondary precipitant who developed AF before the secondary precipitant (e.g. patients admitted  
15  
16 7 with AF who developed infection during their hospital stay), and thereby should have been  
17  
18 8 classified as patients with AF without a secondary precipitant. Moreover, we had no access to  
19  
20 9 patient files, and we did not know whether the patients were discharged in sinus rhythm or with AF.  
21  
22 10 Also, no data were available with regard to the physicians' considerations when choosing between  
23  
24 11 OAC therapy and no OAC therapy, patients compliance, and measurements of international  
25  
26 12 normalized ratio (INR) and time in therapeutic range for warfarin users. Previous studies have  
27  
28 13 shown an association between an impaired platelet nitric oxide response and recent onset AF and  
29  
30 14 that disturbances in nitric oxide function are associated with outcomes (including thromboembolic  
31  
32 15 events, bleeding events, and death) in AF. Unfortunately, we did not have any information on nitric  
33  
34 16 oxide levels in our study cohort.(27,28)

35  
36  
37  
38  
39  
40  
41 17 However, this study was based on a nationwide cohort of patients with many years of follow-up and  
42  
43 18 data from high-quality registries. It reveals unexpected results that should be considered in future  
44  
45 19 treatment guidelines for patients with AF and a secondary precipitant.  
46  
47

48 20  
49  
50 21 Recent onset of AF is associated with marked impairment of platelet NO response. These findings  
51  
52 22 may contribute to thromboembolic risk in such patients.  
53  
54

55 23  
56  
57  
58  
59  
60

1  
2  
3  
4 1 nitric oxide signaling, and that the standard scoring systems for thrombo-embolic risk in patients

5  
6 2 with AF partially parallel plasma concentrations of the NO synthase inhibitor ADMA

7  
8  
9 3

10  
11 4

12  
13 5 *Conclusion*

14  
15 6 In this study we found that patients with AF and a secondary precipitant carried a similar associated

16  
17 7 thromboembolic risk as those with AF without a secondary precipitant. Current guidelines lack data

18  
19 8 on this subject and our results suggests that AF in relation to known triggers may be considered as

20  
21 9 AF in general.

22  
23  
24  
25 10

26  
27 11

28  
29  
30  
31  
32  
33  
34  
35  
36  
37  
38  
39  
40  
41  
42  
43  
44  
45  
46  
47  
48  
49  
50  
51  
52  
53  
54  
55  
56  
57  
58  
59  
60



## 1 **Funding**

2 This research received no specific grant from any funding agency in the public, commercial, or not-  
3 for-profit sectors.

## 4 **Conflicts of interest**

5 AG: None. TK: Consultant fees from BMS, Astra Zeneca, Roche, Boehringer-Ingelheim, Bayer,  
6 MSD. JBO: Speaker for Bristol-Myers Squibb, Boehringer Ingelheim, Bayer, and AstraZeneca.  
7 Consultant for Boehringer Ingelheim and Novo Nordisk. Funding for research from Bristol-Myers  
8 Squibb and The Capital Region of Denmark, Foundation for Health Research. ANB: None J.H.B:  
9 None. GHG: Research grants from Bayer, Bristol-Myers Squibb, AstraZeneca and Boehring  
10 Ingelheim. CTP: Consultant fees and research funding from Bayer and Biotronic LK: None. ELF:  
11 Has previously received research funding from Janssen and Janssen and Bristol-Myers Squibb.  
12  
13

## 14 **Author contributions**

15 The study idea was conceived by AG, TK, and ELF, study design was developed by AG, TK, JBO,  
16 ANB, JHB, GHG, CTP, LK, and ELF, data analyses were made by AG. AG drafted the first version  
17 of the paper and all authors participated in the critical discussions and interpretation of findings. All  
18 authors have participated in the revisions of the draft and have approved the final version.  
19

## 20 **Acknowledgements**

21 None.  
22  
23  
24  
25  
26  
27  
28  
29  
30  
31  
32  
33  
34  
35  
36  
37  
38  
39  
40  
41  
42  
43  
44  
45  
46  
47  
48  
49  
50  
51  
52  
53  
54  
55  
56  
57  
58  
59  
60

1  
2  
3  
4  
5  
6  
7  
8  
9  
10  
11  
12  
13  
14  
15  
16  
17  
18  
19  
20  
21  
22  
23  
24  
25  
26  
27  
28  
29  
30  
31  
32  
33  
34  
35  
36  
37  
38  
39  
40  
41  
42  
43  
44  
45  
46  
47  
48  
49  
50  
51  
52  
53  
54  
55  
56  
57  
58  
59  
60

1

2

For peer review only

## References

1. Procter NEK, Stewart S, Horowitz JD. New-onset atrial fibrillation and thromboembolic risk: Cardiovascular syzygy? *Heart Rhythm*. 2016;13(6):1355–61.
2. Fuster V, Rydén LE, Cannom DS, Crijns HJ, Curtis AB, Ellenbogen KA, et al. 2011 ACCF/AHA/HRS focused updates incorporated into the ACC/AHA/ESC 2006 guidelines for the management of patients with atrial fibrillation: a report of the American College of Cardiology Foundation/American Heart Association Task Force on practice guidelines. *Circulation*. 2011 Mar 15;123(10):e269-367.
3. Lip GYH, Lane DA. Stroke prevention in atrial fibrillation: a systematic review. *JAMA*. 2015 May 19;313(19):1950–62.
4. Kirchhof P, Benussi S, Kotecha D, Ahlsson A, Atar D, Casadei B, et al. 2016 ESC Guidelines for the management of atrial fibrillation developed in collaboration with EACTS. *Eur Heart J*. 2016 Oct 7;37(38):2893–962.
5. January CT, Wann LS, Alpert JS, Calkins H, Cleveland JC, Cigarroa JE, et al. 2014 AHA/ACC/HRS Guideline for the Management of Patients With Atrial Fibrillation. *Circulation*. 2014 Dec 2;130(23):e199–267.
6. Pedersen CB. The Danish Civil Registration System. *Scand J Public Health*. 2011 Jan 7;39(7 suppl):22–5.
7. Lynge E, Sandegaard JL, Rebolj M. The Danish National Patient Register. *Scand J Public Health*. 2011 Jan 7;39(7 suppl):30–3.
8. Helweg-Larsen K. The Danish Register of Causes of Death. *Scand J Public Health*. 2011 Jan 7;39(7 suppl):26–9.
9. Kildemoes HW, Sørensen HT, Hallas J. The Danish National Prescription Registry. *Scand J Public Health*. 2011 Jan 7;39(7 suppl):38–41.
10. Locally Written SAS Macros - Division of Biomedical Statistics and Informatics - Mayo Clinic Research [Internet]. Mayo Clinic. [cited 2017 May 3]. Available from: <http://www.mayo.edu/research/departments-divisions/department-health-sciences-research/division-biomedical-statistics-informatics/software/locally-written-sas-macros>
11. Rix TA, Riahi S, Overvad K, Lundbye-Christensen S, Schmidt EB, Joensen AM. Validity of the diagnoses atrial fibrillation and atrial flutter in a Danish patient registry. *Scand Cardiovasc J* SCJ. 2012 Jun;46(3):149–53.
12. Krarup L-H, Boysen G, Janjua H, Prescott E, Truelsen T. Validity of stroke diagnoses in a National Register of Patients. *Neuroepidemiology*. 2007;28(3):150–4.
13. R Core Team. R: A Language and Environment for Statistical Computing [Internet]. [cited 2017 Sep 19]. Available from: <https://www.R-project.org/>
14. Olesen JB, Lip GYH, Kamper A-L, Hommel K, Køber L, Lane DA, et al. Stroke and bleeding in atrial fibrillation with chronic kidney disease. *N Engl J Med*. 2012 Aug 16;367(7):625–35.
15. Lamberts M, Lip GYH, Hansen ML, Lindhardsen J, Olesen JB, Raunsø J, et al. Relation of nonsteroidal anti-inflammatory drugs to serious bleeding and thromboembolism risk in patients with atrial fibrillation receiving antithrombotic therapy: a nationwide cohort study. *Ann Intern Med*. 2014 Nov 18;161(10):690–8.
16. Fosbøl EL, Gislason GH, Jacobsen S, Abildstrom SZ, Hansen ML, Schramm TK, et al. The pattern of use of non-steroidal anti-inflammatory drugs (NSAIDs) from 1997 to 2005: a nationwide study on 4.6 million people. *Pharmacoepidemiol Drug Saf*. 2008 Aug 1;17(8):822–33.
17. Gundlund A, Kümler T, Olesen JB, Bonde AN, Gislason GH, Torp-Pedersen C, et al. Comparative thromboembolic risk in atrial fibrillation patients with and without a concurrent

1  
2  
3  
4  
5  
6  
7  
8  
9  
10  
11  
12  
13  
14  
15  
16  
17  
18  
19  
20  
21  
22  
23  
24  
25  
26  
27  
28  
29  
30  
31  
32  
33  
34  
35  
36  
37  
38  
39  
40  
41  
42  
43  
44  
45  
46  
47  
48  
49  
50  
51  
52  
53  
54  
55  
56  
57  
58  
59  
60

- infection. *Am Heart J.* 2018 Jul 10;204:43–51.
18. Walkey AJ, Hammill BG, Curtis LH, Benjamin EJ. Long-term outcomes following development of new-onset atrial fibrillation during sepsis. *Chest.* 2014 Nov;146(5):1187–95.
19. Adderley NJ, Nirantharakumar K, Marshall T. Risk of stroke and transient ischaemic attack in patients with a diagnosis of resolved atrial fibrillation: retrospective cohort studies. *BMJ.* 2018 May 9;361:k1717.
20. Lubitz SA, Yin X, Rienstra M, Schnabel RB, Walkey AJ, Magnani JW, et al. Long-term outcomes of secondary atrial fibrillation in the community: the Framingham Heart Study. *Circulation.* 2015 May 12;131(19):1648–55.
21. Fauchier L, Clementy N, Bisson A, Stamboul K, Ivanov F, Angoulvant D, et al. Prognosis in patients with atrial fibrillation and a presumed ‘temporary cause’ in a community-based cohort study. *Clin Res Cardiol Off J Ger Card Soc.* 2017 Mar;106(3):202–10.
22. Quon MJ, Behloul H, Pilote L. Anticoagulant Use and Risk of Ischemic Stroke and Bleeding in Patients With Secondary Atrial Fibrillation Associated With Acute Coronary Syndromes, Acute Pulmonary Disease, or Sepsis. *JACC Clin Electrophysiol.* 2017 Sep 27;500.
23. Gadsbøll K, Staerk L, Fosbøl EL, Sindet-Pedersen C, Gundlund A, Lip GYH, et al. Increased use of oral anticoagulants in patients with atrial fibrillation: temporal trends from 2005 to 2015 in Denmark. *Eur Heart J.* 2017 Jan 21;
24. Gundlund A, Xian Y, Peterson ED, Butt JH, Gadsbøll K, Olesen JB, et al. Prestroke and Poststroke Antithrombotic Therapy in Patients With Atrial Fibrillation: Results From a Nationwide Cohort. *JAMA Netw Open.* 2018 May 18;1(1):e180171–e180171.
25. Roth JA, Bradley K, Thummel KE, Veenstra DL, Boudreau D. Alcohol misuse, genetics, and major bleeding among warfarin therapy patients in a community setting. *Pharmacoepidemiol Drug Saf.* 2015 Jun;24(6):619–27.
26. Traube E, Coplan NL. Embolic risk in atrial fibrillation that arises from hyperthyroidism: review of the medical literature. *Tex Heart Inst J.* 2011;38(3):225–8.
27. Procter NEK, Ball J, Liu S, Hurst N, Nooney VB, Goh V, et al. Impaired platelet nitric oxide response in patients with new onset atrial fibrillation. *Int J Cardiol.* 2015 Jan 20;179:160–5.
28. Horowitz JD, De Caterina R, Heresztyn T, Alexander JH, Andersson U, Lopes RD, et al. Asymmetric and Symmetric Dimethylarginine Predict Outcomes in Patients With Atrial Fibrillation: An ARISTOTLE Substudy. *J Am Coll Cardiol.* 2018 Aug 14;72(7):721–33.

1  
2  
3  
4 **1 Figure legends**

5  
6 **2 Figure 1: Patient selection**

7  
8  
9 **3 Figure 2: Number of events, incidence rates, and crude and adjusted Hazard ratios of long-term**  
10  
11 **4 outcomes in patients with AF with and without a secondary precipitant .**

12  
13 **5 Figure 3: Cumulative incidence of thromboembolic events outcomes by secondary precipitant and**  
14  
15 **6 OAC therapy at the index date.**

16  
17  
18 **7 Figure 4: Cumulative incidence of death events outcomes by secondary precipitant and OAC**  
19  
20 **8 therapy at the index date**

21  
22  
23 **9 Figure 5: Adjusted hazard ratios of long-term outcomes in patients with AF initiated vs. not**  
24  
25 **10 initiated on OAC therapy (stratified according to type of AF)**

**Table 1: Baseline characteristics of the matched population**

|                                                      | Alcohol intoxication group |            | Thyrotoxicosis group |             | Myocardial infarction group |             | Surgery group |             | Infection group |               | >1 precipitant group |             |
|------------------------------------------------------|----------------------------|------------|----------------------|-------------|-----------------------------|-------------|---------------|-------------|-----------------|---------------|----------------------|-------------|
| +/- secondary precipitant:                           | +                          | -          | +                    | -           | +                           | -           | +             | -           | +               | -             | +                    | -           |
|                                                      | N=335                      | N=335      | N=2507               | N=2507      | N=4773                      | N=4773      | N=5229        | N=5229      | N=21,824        | N=21,824      | N=5055               | N=5055      |
| <b>Demographics</b>                                  |                            |            |                      |             |                             |             |               |             |                 |               |                      |             |
| Age, median (IQR*)                                   | 59 (49-66)                 | 59 (49-66) | 73 (63-81)           | 73 (63-81)  | 77 (69-83)                  | 77 (69-83)  | 75 (67-82)    | 75 (67-82)  | 79 (71-86)      | 79 (71-86)    | 76 (68-83)           | 76 (68-83)  |
| Male, n (%)                                          | 276 (82.4)                 | 276 (82.4) | 521 (20.8)           | 521 (20.8)  | 2705 (56.7)                 | 2705 (56.7) | 2724 (52.1)   | 2724 (52.1) | 10,370 (47.5)   | 10,370 (47.5) | 2676 (52.9)          | 2676 (52.9) |
| <b>Comorbidities, n (%)</b>                          |                            |            |                      |             |                             |             |               |             |                 |               |                      |             |
| Cancer                                               | 16 (4.8)                   | 29 (8.7)   | 288 (11.5)           | 296 (11.8)  | 586 (12.3)                  | 688 (14.4)  | 1349 (25.8)   | 882 (16.9)  | 4341 (19.9)     | 3571 (16.4)   | 958 (19.0)           | 807 (16.0)  |
| Chronic kidney disease                               | 11 (3.3)                   | 8 (2.4)    | 61 (2.4)             | 49 (2.0)    | 289 (6.1)                   | 233 (4.7)   | 352 (6.7)     | 198 (3.8)   | 1564 (7.2)      | 748 (3.4)     | 431 (8.5)            | 212 (4.2)   |
| COPD†                                                | 28 (8.4)                   | 23 (6.9)   | 234 (9.3)            | 221 (8.8)   | 619 (13.0)                  | 565 (11.8)  | 665 (12.7)    | 520 (9.9)   | 4696 (21.5)     | 2093 (9.6)    | 914 (18.1)           | 519 (10.3)  |
| Diabetes                                             | 26 (7.8)                   | 18 (5.4)   | 189 (7.5)            | 159 (6.3)   | 575 (12.0)                  | 556 (11.6)  | 503 (9.6)     | 423 (8.1)   | 2167 (9.9)      | 1737 (8.0)    | 498 (9.9)            | 554 (11.0)  |
| Heart failure                                        | 24 (7.2)                   | 18 (5.4)   | 445 (17.8)           | 388 (15.5)  | 1660 (34.8)                 | 1076 (22.5) | 966 (18.5)    | 851 (16.3)  | 5109 (23.4)     | 3709 (17.0)   | 1574 (31.1)          | 925 (18.3)  |
| Hypertension                                         | 64 (19.1)                  | 78 (23.3)  | 1309 (52.2)          | 1249 (49.8) | 3290 (68.9)                 | 3204 (67.1) | 2484 (47.5)   | 2695 (51.5) | 10,445 (47.9)   | 11,475 (52.6) | 2694 (53.3)          | 3007 (59.5) |
| IHD‡                                                 | 43 (12.8)                  | 53 (15.8)  | 333 (13.3)           | 455 (18.1)  | 4773 (100)                  | 1604 (33.6) | 1753 (33.5)   | 1332 (25.5) | 4696 (21.5)     | 5069 (23.2)   | 3072 (60.8)          | 1423 (28.2) |
| PAD§                                                 | 7 (2.1)                    | 8 (2.4)    | 78 (3.1)             | 83 (3.3)    | 375 (7.9)                   | 293 (6.1)   | 468 (9.0)     | 233 (4.5)   | 1392 (6.4)      | 932 (4.3)     | 448 (8.9)            | 269 (5.3)   |
| Prior bleeding event                                 | 81 (24.2)                  | 42 (12.5)  | 243 (9.7)            | 249 (9.9)   | 722 (15.1)                  | 715 (15.0)  | 1267 (24.2)   | 833 (15.9)  | 4319 (19.8)     | 3463 (15.9)   | 1171 (23.2)          | 811 (16.0)  |
| Prior thromboembolic event                           | 24 (7.2)                   | 24 (7.2)   | 138 (5.5)            | 183 (7.3)   | 483 (10.1)                  | 698 (14.6)  | 571 (10.9)    | 570 (10.9)  | 2651 (12.1)     | 2278 (10.4)   | 603 (11.9)           | 635 (12.6)  |
| <b>Risk scores</b>                                   |                            |            |                      |             |                             |             |               |             |                 |               |                      |             |
| CHA <sub>2</sub> DS <sub>2</sub> -VASC <sup>  </sup> |                            |            |                      |             |                             |             |               |             |                 |               |                      |             |
| Median (IQR*)                                        | 1 (0-2)                    | 1 (0-2)    | 3 (2-4)              | 3 (2-4)     | 4 (3-5)                     | 3 (3-4)     | 3 (2-4)       | 3 (2-4)     | 3 (2-4)         | 3 (2-4)       | 4 (2-5)              | 3 (2.4)     |
| 0                                                    | 158 (47.2)                 | 158 (47.2) | 405 (16.2)           | 405 (16.2)  | 0                           | 0           | 391 (7.5)     | 391 (7.5)   | 1328 (6.1)      | 1328 (6.1)    | 269 (5.3)            | 269 (5.3)   |
| 1-2                                                  | 118 (35.2)                 | 118 (35.2) | 530 (3.0)            | 530 (3.0)   | 670 (14.0)                  | 670 (14.0)  | 1406 (26.9)   | 1406 (26.9) | 5148 (23.6)     | 5148 (23.6)   | 1005 (19.9)          | 1005 (19.9) |
| ≥3                                                   | 59 (17.6)                  | 59 (17.6)  | 1572 (62.7)          | 1572 (62.7) | 4103 (86.0)                 | 4103 (86.0) | 3432 (65.6)   | 3432 (65.6) | 15,348 (70.3)   | 15,348 (70.3) | 3781 (74.8)          | 3781 (74.8) |
| HAS-BLED <sup>#</sup>                                |                            |            |                      |             |                             |             |               |             |                 |               |                      |             |
| Median (IQR*)                                        | 2 (1-3)                    | 1 (0-2)    | 2 (1-3)              | 2 (1-3)     | 3 (2-3)                     | 2 (2-3)     | 2 (1-3)       | 2 (1-3)     | 2 (1-3)         | 2 (1-3)       | 2 (2-3)              | 2 (2-3)     |
| 0                                                    | 0                          | 0          | 355 (14.2)           | 331 (13.2)  | 134 (2.8)                   | 76 (1.6)    | 289 (5.5)     | 381 (7.3)   | 1003 (4.6)      | 1147 (5.2)    | 208 (4.1)            | 242 (4.8)   |
| 1-2                                                  | 232 (69.3)                 | 155 (46.3) | 1460 (58.2)          | 1440 (57.4) | 2552 (53.5)                 | 2863 (54.8) | 2863 (54.8)   | 2935 (56.1) | 12,130 (55.6)   | 12,129 (55.6) | 2422 (47.9)          | 2638 (52.2) |
| ≥3                                                   | 103 (30.8)                 | 52 (15.5)  | 692 (27.6)           | 736 (29.4)  | 2145 (6.7)                  | 2077 (6.5)  | 2077 (39.7)   | 1913 (36.6) | 8691 (39.8)     | 8548 (39.2)   | 2425 (48.0)          | 2175 (43.0) |
| <b>Pharmacotherapy, n (%)</b>                        |                            |            |                      |             |                             |             |               |             |                 |               |                      |             |
| OAC <sup>**</sup> therapy, n (%)                     | 33 (9.9)                   | 33 (9.9)   | 1100 (43.9)          | 1100 (43.9) | 1311 (27.5)                 | 1311 (27.5) | 1150 (22.0)   | 1150 (22.0) | 5985 (27.4)     | 5985 (27.4)   | 1087 (21.5)          | 1087 (21.5) |
| Amiodarone                                           | ≤3                         | 6 (1.8)    | 33 (1.3)             | 62 (2.5)    | 359 (7.5)                   | 158 (3.3)   | 443 (8.5)     | 163 (3.1)   | 617 (2.8)       | 574 (2.6)     | 418 (8.3)            | 154 (3.0)   |

|    |                                                                                                                                                                                                                     |           |          |             |            |             |             |             |             |             |             |             |             |
|----|---------------------------------------------------------------------------------------------------------------------------------------------------------------------------------------------------------------------|-----------|----------|-------------|------------|-------------|-------------|-------------|-------------|-------------|-------------|-------------|-------------|
| 1  |                                                                                                                                                                                                                     |           |          |             |            |             |             |             |             |             |             |             |             |
| 2  | Digoxin                                                                                                                                                                                                             | 49 (14.6) | 29 (8.7) | 1000 (39.9) | 916 (36.5) | 1207 (25.3) | 1502 (31.5) | 1089 (20.8) | 1285 (24.6) | 7973 (36.5) | 6286 (28.8) | 1184 (23.4) | 1223 (24.2) |
| 3  | Flecainide                                                                                                                                                                                                          | 0 (0)     | ≤ 3      | 13 (0.5)    | 29 (1.2)   | 9 (0.2)     | 32 (0.7)    | 12 (0.2)    | 52 (1.0)    | 40 (0.2)    | 156 (0.7)   | 6 (0.1)     | 27 (0.5)    |
| 4  | *IQR: interquartile range. †COPD: chronic obstructive pulmonary disease. ‡IHD: ischemic heart disease. §PAD: peripheral artery disease.   CHA <sub>2</sub> DS <sub>2</sub> -VASc: Risk score for stroke: congestive |           |          |             |            |             |             |             |             |             |             |             |             |
| 5  | heart failure/LV function, hypertension, age 65-74 years, age>74 years (2 points), diabetes, stroke/TIA/systemic embolism (2 points), vascular disease, sex category (female); #HAS-BLED: Risk                      |           |          |             |            |             |             |             |             |             |             |             |             |
| 6  | score for bleeding: hypertension, abnormal renal/liver function, history of stroke, history of bleeding, INR (left out due to missing data), age>65 years, drug consumption with antiplatelet                       |           |          |             |            |             |             |             |             |             |             |             |             |
| 7  | agents/non-steroidal inflammatory drugs, alcohol abuse. **OAC: oral anticoagulation.                                                                                                                                |           |          |             |            |             |             |             |             |             |             |             |             |
| 8  |                                                                                                                                                                                                                     |           |          |             |            |             |             |             |             |             |             |             |             |
| 9  |                                                                                                                                                                                                                     |           |          |             |            |             |             |             |             |             |             |             |             |
| 10 |                                                                                                                                                                                                                     |           |          |             |            |             |             |             |             |             |             |             |             |
| 11 |                                                                                                                                                                                                                     |           |          |             |            |             |             |             |             |             |             |             |             |
| 12 |                                                                                                                                                                                                                     |           |          |             |            |             |             |             |             |             |             |             |             |
| 13 |                                                                                                                                                                                                                     |           |          |             |            |             |             |             |             |             |             |             |             |
| 14 |                                                                                                                                                                                                                     |           |          |             |            |             |             |             |             |             |             |             |             |
| 15 |                                                                                                                                                                                                                     |           |          |             |            |             |             |             |             |             |             |             |             |
| 16 |                                                                                                                                                                                                                     |           |          |             |            |             |             |             |             |             |             |             |             |
| 17 |                                                                                                                                                                                                                     |           |          |             |            |             |             |             |             |             |             |             |             |
| 18 |                                                                                                                                                                                                                     |           |          |             |            |             |             |             |             |             |             |             |             |
| 19 |                                                                                                                                                                                                                     |           |          |             |            |             |             |             |             |             |             |             |             |
| 20 |                                                                                                                                                                                                                     |           |          |             |            |             |             |             |             |             |             |             |             |
| 21 |                                                                                                                                                                                                                     |           |          |             |            |             |             |             |             |             |             |             |             |
| 22 |                                                                                                                                                                                                                     |           |          |             |            |             |             |             |             |             |             |             |             |
| 23 |                                                                                                                                                                                                                     |           |          |             |            |             |             |             |             |             |             |             |             |
| 24 |                                                                                                                                                                                                                     |           |          |             |            |             |             |             |             |             |             |             |             |
| 25 |                                                                                                                                                                                                                     |           |          |             |            |             |             |             |             |             |             |             |             |
| 26 |                                                                                                                                                                                                                     |           |          |             |            |             |             |             |             |             |             |             |             |
| 27 |                                                                                                                                                                                                                     |           |          |             |            |             |             |             |             |             |             |             |             |
| 28 |                                                                                                                                                                                                                     |           |          |             |            |             |             |             |             |             |             |             |             |
| 29 |                                                                                                                                                                                                                     |           |          |             |            |             |             |             |             |             |             |             |             |
| 30 |                                                                                                                                                                                                                     |           |          |             |            |             |             |             |             |             |             |             |             |
| 31 |                                                                                                                                                                                                                     |           |          |             |            |             |             |             |             |             |             |             |             |
| 32 |                                                                                                                                                                                                                     |           |          |             |            |             |             |             |             |             |             |             |             |
| 33 |                                                                                                                                                                                                                     |           |          |             |            |             |             |             |             |             |             |             |             |
| 34 |                                                                                                                                                                                                                     |           |          |             |            |             |             |             |             |             |             |             |             |
| 35 |                                                                                                                                                                                                                     |           |          |             |            |             |             |             |             |             |             |             |             |
| 36 |                                                                                                                                                                                                                     |           |          |             |            |             |             |             |             |             |             |             |             |
| 37 |                                                                                                                                                                                                                     |           |          |             |            |             |             |             |             |             |             |             |             |
| 38 |                                                                                                                                                                                                                     |           |          |             |            |             |             |             |             |             |             |             |             |
| 39 |                                                                                                                                                                                                                     |           |          |             |            |             |             |             |             |             |             |             |             |
| 40 |                                                                                                                                                                                                                     |           |          |             |            |             |             |             |             |             |             |             |             |
| 41 |                                                                                                                                                                                                                     |           |          |             |            |             |             |             |             |             |             |             |             |
| 42 |                                                                                                                                                                                                                     |           |          |             |            |             |             |             |             |             |             |             |             |
| 43 |                                                                                                                                                                                                                     |           |          |             |            |             |             |             |             |             |             |             |             |
| 44 |                                                                                                                                                                                                                     |           |          |             |            |             |             |             |             |             |             |             |             |
| 45 |                                                                                                                                                                                                                     |           |          |             |            |             |             |             |             |             |             |             |             |
| 46 |                                                                                                                                                                                                                     |           |          |             |            |             |             |             |             |             |             |             |             |

For peer review only

1  
2  
3  
4  
5  
6  
7  
8  
9  
10  
11  
12  
13  
14  
15  
16  
17  
18  
19  
20  
21  
22  
23  
24  
25  
26  
27  
28  
29  
30  
31  
32  
33  
34  
35  
36  
37  
38  
39  
40  
41  
42  
43  
44  
45  
46

For peer review only



AF for the first time with a secondary precipitant, 1996-2015  
N=66,242

AF for the first time without a secondary precipitant, 1996-2015  
N=138,618

**Exclusions (N=26,166)**

- <18 years or > 100 years, N=134
- Valvular atrial fibrillation, N=2038
- Atrial fibrillation therapy before hospital admission, N=13,916
- Dead or emigrated during the blanking period, N=7366
- Thromboembolic event during the blanking period, N=2712

**Exclusions (N=40,430)**

- <18 years or > 100 years, N=278
- Valvular atrial fibrillation, N=2550
- Atrial fibrillation therapy before hospital admission, N=33,629
- Dead or emigrated during the blanking period, N=1992
- Thromboembolic event during the blanking period, N=1981

**Complete study population**

AF with secondary precipitant  
N=40,076

AF without secondary precipitant  
N=98,188

**Matched population**

- 39,723 patients with AF with secondary precipitant
  - 335 (0.8%) with alcohol intoxication
  - 2507 (6.3%) with thyrotoxicosis
  - 4773 (12.0%) with myocardial infarction
  - 5229 (13.2%) had had surgery
  - 21,824 (55.0%) with infection
  - 5055 (12.7%) with >1 precipitant
- 39,723 patients with AF without a secondary precipitant

1  
2  
3  
4  
5  
6  
7  
8  
9  
10  
11  
12  
13  
14  
15  
16  
17  
18  
19  
20  
21  
22  
23  
24  
25  
26  
27  
28  
29  
30  
31  
32  
33  
34  
35  
36  
37  
38  
39  
40  
41

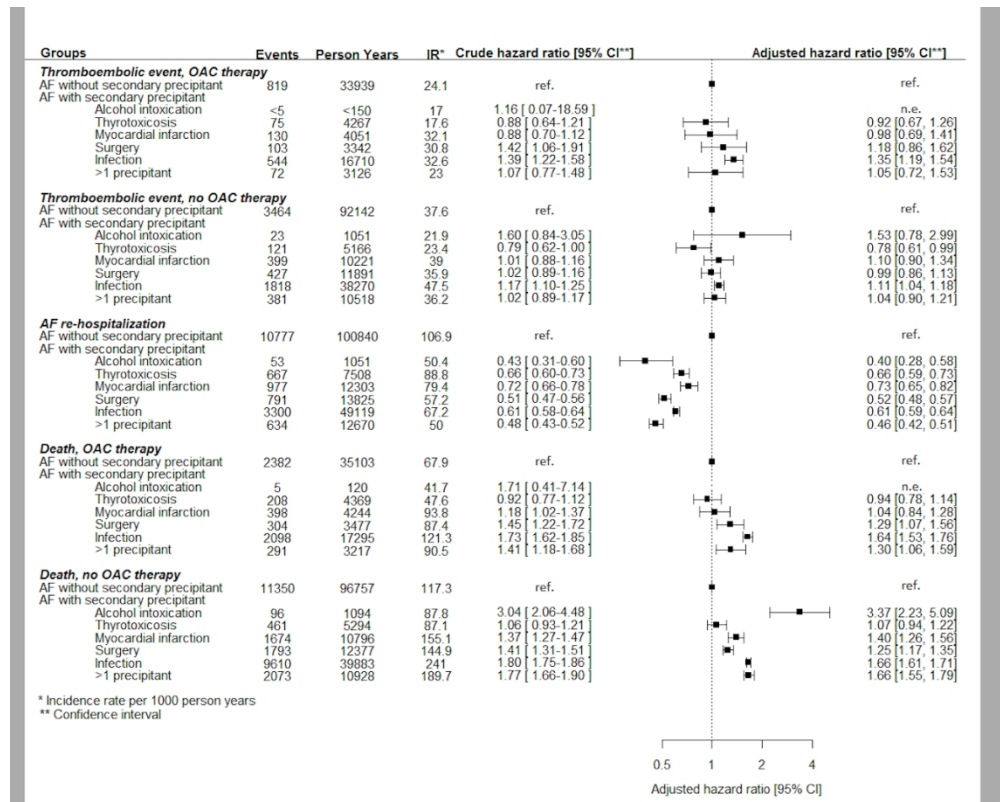

112x90mm (300 x 300 DPI)

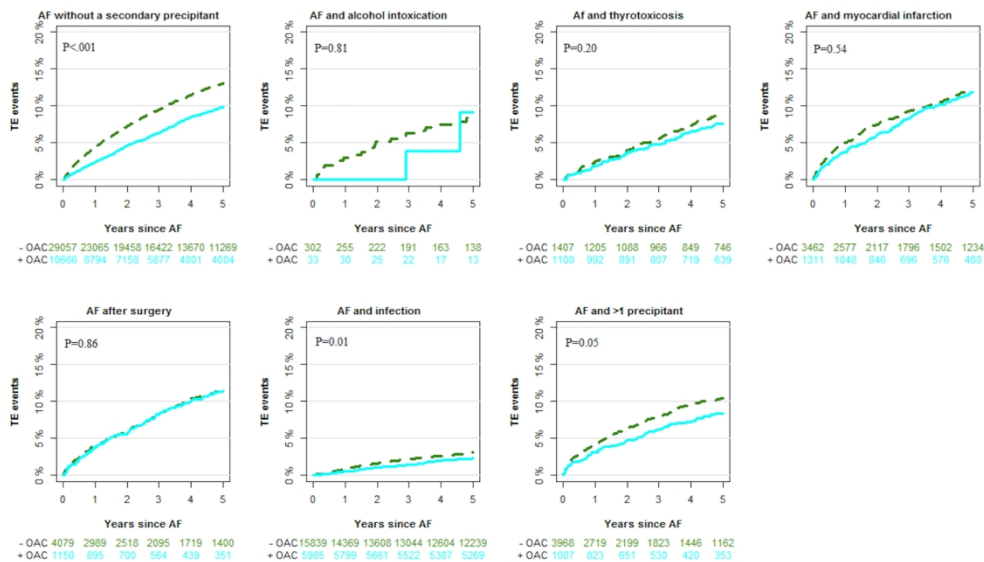

160x94mm (300 x 300 DPI)

1  
2  
3  
4  
5  
6  
7  
8  
9  
10  
11  
12  
13  
14  
15  
16  
17  
18  
19  
20  
21  
22  
23  
24  
25  
26  
27  
28  
29  
30  
31  
32  
33  
34  
35  
36  
37  
38  
39  
40  
41  
42  
43  
44  
45  
46  
47  
48  
49  
50  
51  
52  
53  
54  
55  
56  
57  
58  
59  
60

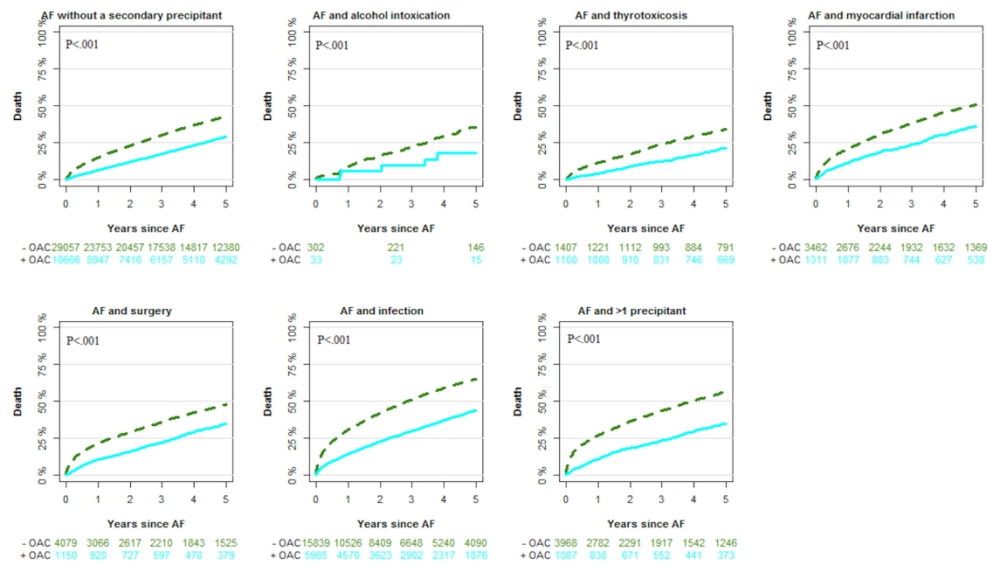

160x94mm (300 x 300 DPI)

1  
2  
3  
4  
5  
6  
7  
8  
9  
10  
11  
12  
13  
14  
15  
16  
17  
18  
19  
20  
21  
22  
23  
24  
25  
26  
27  
28  
29  
30  
31  
32  
33  
34  
35  
36  
37  
38  
39  
40  
41  
42  
43  
44  
45  
46  
47  
48  
49  
50  
51  
52  
53  
54  
55  
56  
57  
58  
59  
60

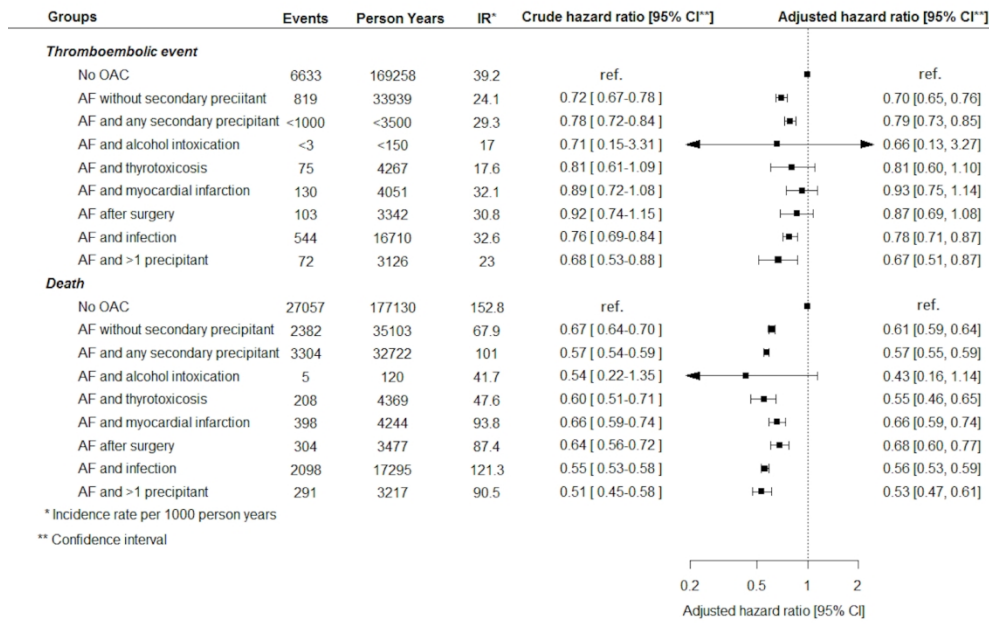

134x90mm (300 x 300 DPI)

## Supplemental material

### Comparative thromboembolic risk in atrial fibrillation with and without a secondary precipitant – a Danish nationwide cohort study

Anna Gundlund, MD, PhD; Thomas Kümler, MD, PhD; Anders N. Bonde, MD; Jawad H. Butt, MD; Gunnar H. Gislason, MD, PhD; Christian Torp-Pedersen, MD, DMSc; Lars Køber, MD, DMSc; Jonas B. Olesen, MD, PhD; Emil L. Fosbøl, MD, PhD

Online Table 1: Specification of diagnoses by international classification of diseases (ICD-8 and ICD-10) codes and pharmacotherapy by anatomical therapeutic chemical classification (ATC) codes.

Online Table 2: Baseline characteristics of the non-matched population, patients initiated on OAC therapy

Online Table 3: Baseline characteristics of the non-matched population, patients not initiated on OAC therapy

Online Figure 1: Adjusted Hazard ratios of long-term outcomes in patients with AF with and without a secondary precipitant. Adjustments: age groups, peripheral artery disease, heart failure, hypertension, prior thromboembolic event, ischemic heart disease, chronic kidney disease, diabetes, prior bleeding event, cancer, antiarrhythmic therapy (amiodarone, digoxin, flecainide) at the index date and OAC therapy status as a time-dependent variable.

**Online Table 1: Specification of diagnoses by international classification of diseases (ICD-8 and ICD-10) codes and pharmacotherapy by anatomical therapeutic chemical classification (ATC) codes.**

| Precipitants                           | ICD-10 codes and NCSP, NOMESCO Classification of Surgical Procedures                                                                                                                                                                                                                                                                                                                                                                                                                                                                                                                                                  |
|----------------------------------------|-----------------------------------------------------------------------------------------------------------------------------------------------------------------------------------------------------------------------------------------------------------------------------------------------------------------------------------------------------------------------------------------------------------------------------------------------------------------------------------------------------------------------------------------------------------------------------------------------------------------------|
| Alcohol intoxication                   | ICD-10: F100, F103, F104, R780, T51, X65                                                                                                                                                                                                                                                                                                                                                                                                                                                                                                                                                                              |
| Infections                             | ICD-10:<br>Certain infectious and parasitic diseases: A00-B99.<br>Infections in the eye and adnexa: H00, H01, H10, H20, H30, H44, H60, H65-H68, H70, H73.0, H73.1<br>Infections in the cardiovascular organs: I30, I32, I33, I38-I41<br>Infections in pulmonary system: J00-J22, J32, J36, J85, J86<br>Infections in the gastrointestinal system: K12, K20, K35-K37, K57, K65, K67, K81, K85<br>Infections in the skin, subcutaneous tissue, bones, muscles, and connective tissue: L00-L08, M00, M01, M60, M63.2. M65, M86, M90.0, M90.1, M90.2<br>Infections in the urogenital system: N00, N01, N05, N30, N70-N77. |
| Myocardial infarction                  | ICD-10: I21                                                                                                                                                                                                                                                                                                                                                                                                                                                                                                                                                                                                           |
| Pulmonary embolism                     | ICD-10: I260, I269, O882D, O882E, T817D                                                                                                                                                                                                                                                                                                                                                                                                                                                                                                                                                                               |
| Surgery                                | NCSP, NOMESCO Classification of Surgical Procedures: KF, KM, KN, KD, KPH, KPJ, KJ, KH, KQ, KB, KC, KL, KE, KA, KG, KK.                                                                                                                                                                                                                                                                                                                                                                                                                                                                                                |
| Thyrotoxicosis                         | ICD-10: E05                                                                                                                                                                                                                                                                                                                                                                                                                                                                                                                                                                                                           |
| Outcomes                               |                                                                                                                                                                                                                                                                                                                                                                                                                                                                                                                                                                                                                       |
| Atrial fibrillation re-hospitalization | Hospital admission with primary diagnosis of atrial fibrillation: I48                                                                                                                                                                                                                                                                                                                                                                                                                                                                                                                                                 |
| Thromboembolic event                   | Ischemic stroke: I63, I64<br>Death from stroke: I61-I64<br>Transient ischemic attack: G458, G459<br>Thrombosis or embolism in arteries: I74                                                                                                                                                                                                                                                                                                                                                                                                                                                                           |
| Comorbidities                          | ICD-8 and ICD-10 codes                                                                                                                                                                                                                                                                                                                                                                                                                                                                                                                                                                                                |

|                                       |                                                                                                                                                                                                                                                                                                                                                                           |
|---------------------------------------|---------------------------------------------------------------------------------------------------------------------------------------------------------------------------------------------------------------------------------------------------------------------------------------------------------------------------------------------------------------------------|
| Atrial fibrillation                   | ICD-10: I48<br>ICD-8: 42793, 42794                                                                                                                                                                                                                                                                                                                                        |
| Alcohol abuse                         | ICD-10: E24.4, E52, F10, G31.2, G62.1, G72.1, I42.6, K29.2, K70, K86.0, L27.8A, O35.4, T51, Z71.4, Z72.1.<br><br>ATC: N07BB                                                                                                                                                                                                                                               |
| Cancer                                | ICD-10: C                                                                                                                                                                                                                                                                                                                                                                 |
| Chronic kidney disease                | ICD-10: E10.2, E11.2, E13.2, E14.2, I12.0, M32.1B, N02-N08, N11, N12, N14, N15.8, N15.9, N16.0, N16.2-N16.4, N16.8, N18, N19, N26, Q61                                                                                                                                                                                                                                    |
| Chronic obstructive pulmonary disease | ICD-10: J42, J43, J44                                                                                                                                                                                                                                                                                                                                                     |
| Diabetes                              | ATC: A10 (3 months before index)                                                                                                                                                                                                                                                                                                                                          |
| Heart failure                         | ICD-10: I11.0, I42, I50, J81                                                                                                                                                                                                                                                                                                                                              |
| Hypertension                          | Usage of a combination of at least two of the seven different drug classes at the same time: <ol style="list-style-type: none"> <li>1. Non-loop diuretics</li> <li>2. Loop diuretics</li> <li>3. Antiadrenergic agents</li> <li>4. Beta-blockers</li> <li>5. Vasodilators</li> <li>6. Calcium channel blockers</li> <li>7. Renin-angiotensin system inhibitors</li> </ol> |
| Ischemic heart disease                | ICD-10: I20-I25                                                                                                                                                                                                                                                                                                                                                           |
| Peripheral artery disease             | ICD-10: I70                                                                                                                                                                                                                                                                                                                                                               |
| Prior bleeding                        | ICD-10: D50.0, D62, G951A, H31.3, H05.2A, H35.6, H43.1, H45.0, I31.2, I60-I62, I85.0, I86.4A, J94.2, K22.8F, K25.0, K25.2, K25.4, K25.6, K26.0, K26.2, K26.4, K26.6, K27.0, K27.2, K27.4, K27.6, K28.0, K28.2, K28.4, K28.6, K29.8A, K62.5, K63.8B, K63.8C, K66.1, K83.8F, K86.8G, K92.0-K92.2, N02, R04, R31, S06.4-S06.6, S36.8D                                        |
| Thromboembolic event                  | ICD-10: G45.8, G45.9, I63, I64, I74                                                                                                                                                                                                                                                                                                                                       |
| Valvular atrial fibrillation          | Atrial fibrillation without:<br>ICD-10: I05, I06, I080A, I081A, I082A, I083A, Z952, Z954<br>ICD-8: 39500-39502, 39508, 39509, 39600-39604, 39608, 39609<br>Procedures: FKD, FKH, FMD, FMH, FGE, FJE                                                                                                                                                                       |
| <b>Pharmacotherapy</b>                | <b>ACT-codes</b>                                                                                                                                                                                                                                                                                                                                                          |



1  
2  
3  
4  
5  
6  
7  
8  
9  
10  
11  
12  
13  
14  
15  
16  
17  
18  
19  
20  
21  
22  
23  
24  
25  
26  
27  
28  
29  
30  
31  
32  
33  
34  
35  
36  
37  
38  
39  
40  
41  
42  
43  
44  
45  
46  
47  
48  
49  
50  
51  
52  
53  
54  
55  
56  
57  
58  
59  
60

|                                     |                                                                                                                       |
|-------------------------------------|-----------------------------------------------------------------------------------------------------------------------|
| ADP-receptor blockers               | B01AC04, B01AC22, B01AC24                                                                                             |
| Amiodarone                          | C01BD01                                                                                                               |
| Antiadrenergic agents               | C02A, C02B, C02C                                                                                                      |
| Oral anticoagulation therapy        | Vitamin K antagonists: B01AA03, B01AA04<br>Non-vitamin K antagonist oral anticoagulants:<br>B01AF01, B01AF02, B01AE07 |
| Beta-blockers                       | C07A, C07B, C07C, C07D, C07F                                                                                          |
| Calcium channel blockers            | C08, C09BB, C09DB                                                                                                     |
| Digoxin                             | C01AA                                                                                                                 |
| Flecainide                          | C01BC                                                                                                                 |
| Loop diuretics                      | C03C, C03EB                                                                                                           |
| Non-loop diuretics                  | C02DA, C03EA, C03EB, C02L, C03A, C03B,<br>C03D, C03E, C03X, C07B, C07C, C07D, C08G,<br>C09BA, C09DA, C09XA52          |
| Renin-angiotensin system inhibitors | C09AA, C09BA, C09BB, C09CA, C09DA,<br>C09DB, C09XA02, C09XA52                                                         |
| Vasodilators                        | C02DB, C02DD, C02DG                                                                                                   |

**Online Table 2: Baseline characteristics of the non-matched population, patients initiated on OAC therapy**

|                                                      | AF with a secondary precipitant<br>N=10,673 |                               |                                    |                   |                     |                          | AF without a<br>secondary<br>precipitant<br>N=37,827 |
|------------------------------------------------------|---------------------------------------------|-------------------------------|------------------------------------|-------------------|---------------------|--------------------------|------------------------------------------------------|
|                                                      | Alcohol<br>intoxication<br>N=33             | Thyro-<br>toxicosis<br>N=1103 | Myocardial<br>infarction<br>N=1312 | Surgery<br>N=1151 | Infection<br>N=5987 | >1 precipitant<br>N=1087 |                                                      |
| <b>Demographics</b>                                  |                                             |                               |                                    |                   |                     |                          |                                                      |
| Age, median (IQR*)                                   | 64 (55-68)                                  | 72 (64-79)                    | 75 (68-81)                         | 74 (67-81)        | 77 (69-83)          | 75 (68-81)               | 72 (64-79)                                           |
| Male, n (%)                                          | 28 (84.8)                                   | 259 (23.5)                    | 842 (64.2)                         | 667 (57.9)        | 3189 (53.3)         | 634 (58.3)               | 21,386 (56.5)                                        |
| <b>Comorbidities, n (%)</b>                          |                                             |                               |                                    |                   |                     |                          |                                                      |
| Cancer                                               | ≤3                                          | 114 (10.3)                    | 146 (11.1)                         | 239 (20.8)        | 927 (15.5)          | 171 (15.1)               | 4617 (12.2)                                          |
| Chronic kidney disease                               | 4 (12.1)                                    | 23 (2.1)                      | 62 (4.7)                           | 65 (5.6)          | 372 (6.2)           | 59 (5.4)                 | 1011 (2.7)                                           |
| COPD†                                                | ≤3                                          | 106 (9.6)                     | 133 (10.1)                         | 128 (11.1)        | 1251 (20.9)         | 157 (14.4)               | 3426 (9.1)                                           |
| Diabetes                                             | ≤3                                          | 84 (7.6)                      | 159 (12.1)                         | 111 (9.6)         | 712 (11.9)          | 112 (10.3)               | 3384 (8.9)                                           |
| Heart failure                                        | 6 (18.2)                                    | 236 (21.4)                    | 464 (35.4)                         | 228 (19.8)        | 1440 (24.1)         | 359 (33.0)               | 6791 (18.0)                                          |
| Hypertension                                         | 11 (33.3)                                   | 658 (59.7)                    | 982 (74.8)                         | 687 (59.7)        | 3652 (61.0)         | 723 (66.5)               | 23,057 (61.0)                                        |
| IHD‡                                                 | 5 (15.2)                                    | 129 (11.7)                    | 1312 (100)                         | 434 (37.7)        | 1202 (20.1)         | 744 (68.4)               | 7360 (19.5)                                          |
| PAD§                                                 | ≤3                                          | 29 (2.6)                      | 83 (6.3)                           | 101 (8.8)         | 353 (5.9)           | 77 (7.1)                 | 1258 (3.3)                                           |
| Prior bleeding event                                 | 7 (21.2)                                    | 86 (7.8)                      | 150 (11.4)                         | 213 (18.5)        | 966 (16.1)          | 182 (16.7)               | 4564 (12.1)                                          |
| Prior thromboembolic event                           | ≤3                                          | 60 (5.4)                      | 142 (10.8)                         | 153 (13.3)        | 672 (11.2)          | 133 (12.2)               | 3313 (8.8)                                           |
| <b>Risk scores</b>                                   |                                             |                               |                                    |                   |                     |                          |                                                      |
| CHA <sub>2</sub> DS <sub>2</sub> -VASc <sup>  </sup> |                                             |                               |                                    |                   |                     |                          |                                                      |
| Median (IQR*)                                        | 1 (0-2)                                     | 3 (2-4)                       | 4 (3-5)                            | 3 (2-4)           | 3 (2-4)             | 4 (3-5)                  | 3 (2-4)                                              |
| 0                                                    | 11 (33.3)                                   | 134 (12.2)                    | 0                                  | 74 (6.4)          | 269 (4.5)           | 28 (2.6)                 | 3592 (9.5)                                           |
| 1-2                                                  | 16 (48.5)                                   | 263 (23.8)                    | 181 (13.8)                         | 289 (25.1)        | 1493 (24.9)         | 181 (16.6)               | 12,341 (32.6)                                        |
| ≥3                                                   | 6 (18.2)                                    | 706 (64.0)                    | 1131 (86.2)                        | 788 (68.5)        | 4225 (70.6)         | 878 (80.8)               | 21,894 (57.9)                                        |
| HAS-BLED <sup>#</sup>                                |                                             |                               |                                    |                   |                     |                          |                                                      |
| Median (IQR*)                                        | 2 (1-3)                                     | 2 (1-2)                       | 3 (2-3)                            | 2 (1-3)           | 2 (1-3)             | 2 (2-3)                  | 2 (1-3)                                              |
| 0                                                    | 0                                           | 128 (11.6)                    | 32 (2.4)                           | 60 (5.2)          | 259 (4.3)           | 33 (3.0)                 | 3361 (8.9)                                           |
| 1-2                                                  | 21 (63.6)                                   | 706 (64.0)                    | 571 (43.5)                         | 611 (53.1)        | 3433 (57.3)         | 515 (47.4)               | 22,792 (60.3)                                        |
| ≥3                                                   | 12 (36.4)                                   | 269 (24.4)                    | 709 (54.0)                         | 480 (41.7)        | 2295 (38.3)         | 539 (49.6)               | 11,674 (30.9)                                        |
| <b>Pharmacotherapy, n (%)</b>                        |                                             |                               |                                    |                   |                     |                          |                                                      |

|            |           |            |            |            |             |            |               |
|------------|-----------|------------|------------|------------|-------------|------------|---------------|
| Amiodarone | 0         | 19 (1.7)   | 104 (7.9)  | 181 (15.7) | 261 (4.4)   | 141 (13.0) | 1493 (3.9)    |
| Digoxin    | 11 (33.3) | 605 (54.9) | 437 (33.3) | 312 (27.1) | 2847 (47.6) | 368 (33.9) | 14,803 (39.1) |
| Flecainide | 0         | 5 (0.5)    | ≤3         | ≤3         | 10 (0.2)    | ≤3         | 248 (0.7)     |

\*IQR: interquartile range. †COPD: chronic obstructive pulmonary disease. ‡IHD: ischemic heart disease. §PAD: peripheral artery disease. ¶CHA<sub>2</sub>DS<sub>2</sub>-VASc: Risk score for stroke: congestive heart failure/LV function, hypertension, age 65-74 years, age>74 years (2 points), diabetes, stroke/TIA/systemic embolism (2 points), vascular disease, sex category (female); #HAS-BLED: Risk score for bleeding: hypertension, abnormal renal/liver function, history of stroke, history of bleeding, INR (left out due to missing data), age>65 years, drug consumption with antiplatelet agents/non-steroidal inflammatory drugs, alcohol abuse.

For peer review only

**Online Table 3: Baseline characteristics of the non-matched population, patients not initiated on OAC therapy**

|                                                      | AF with a secondary precipitant<br>N=29,403 |                               |                                    |                   |                       |                          | AF without a<br>secondary<br>precipitant<br>N=60,361 |
|------------------------------------------------------|---------------------------------------------|-------------------------------|------------------------------------|-------------------|-----------------------|--------------------------|------------------------------------------------------|
|                                                      | Alcohol<br>intoxication<br>N=302            | Thyro-<br>toxicosis<br>N=1408 | Myocardial<br>infarction<br>N=3508 | Surgery<br>N=4101 | Infection<br>N=16,079 | >1 precipitant<br>N=4005 |                                                      |
| <b>Demographics</b>                                  |                                             |                               |                                    |                   |                       |                          |                                                      |
| Age, median (IQR*)                                   | 58 (48-66)                                  | 74 (62-82)                    | 78 (69-84)                         | 76 (67-82)        | 80 (72-87)            | 76 (68-83)               | 69 (58-80)                                           |
| Male, n (%)                                          | 248 (82.1)                                  | 263 (18.7)                    | 1907 (54.4)                        | 2069 (50.5)       | 7352 (45.7)           | 2073 (51.8)              | 31,074 (51.5)                                        |
| <b>Comorbidities, n (%)</b>                          |                                             |                               |                                    |                   |                       |                          |                                                      |
| Cancer                                               | 15 (5.0)                                    | 174 (12.4)                    | 454 (12.9)                         | 1115 (27.2)       | 3474 (21.6)           | 795 (19.9)               | 7915 (13.1)                                          |
| Chronic kidney disease                               | 7 (2.3)                                     | 38 (2.7)                      | 236 (6.7)                          | 289 (7.0)         | 1223 (7.6)            | 375 (9.4)                | 1733 (2.9)                                           |
| COPD†                                                | 26 (8.6)                                    | 128 (9.1)                     | 495 (14.1)                         | 539 (13.1)        | 3493 (21.7)           | 765 (19.1)               | 4544 (7.5)                                           |
| Diabetes                                             | 24 (7.9)                                    | 105 (7.5)                     | 417 (11.9)                         | 396 (9.7)         | 1473 (9.2)            | 387 (9.7)                | 3566 (5.9)                                           |
| Heart failure                                        | 18 (6.0)                                    | 209 (14.8)                    | 1218 (34.7)                        | 744 (18.1)        | 3752 (23.3)           | 1231 (30.7)              | 6328 (10.5)                                          |
| Hypertension                                         | 53 (17.5)                                   | 653 (46.4)                    | 2348 (66.9)                        | 1808 (44.1)       | 6942 (43.2)           | 1991 (49.7)              | 22,309 (37.0)                                        |
| IHD‡                                                 | 38 (12.6)                                   | 207 (14.7)                    | 3508 (100)                         | 1326 (32.3)       | 3558 (22.1)           | 2354 (58.8)              | 11,528 (19.1)                                        |
| PAD§                                                 | 6 (2.0)                                     | 49 (3.5)                      | 298 (8.5)                          | 371 (9.0)         | 1057 (6.6)            | 374 (9.3)                | 1913 (3.2)                                           |
| Prior bleeding event                                 | 74 (24.5)                                   | 157 (11.2)                    | 585 (16.7)                         | 1062 (25.9)       | 3420 (21.3)           | 998 (24.9)               | 7616 (12.6)                                          |
| Prior thromboembolic event                           | 22 (7.3)                                    | 78 (5.5)                      | 350 (10.0)                         | 422 (10.3)        | 2029 (12.6)           | 478 (11.9)               | 4301 (7.1)                                           |
| <b>Risk scores</b>                                   |                                             |                               |                                    |                   |                       |                          |                                                      |
| CHA <sub>2</sub> DS <sub>2</sub> -VASC <sup>  </sup> |                                             |                               |                                    |                   |                       |                          |                                                      |
| Median (IQR*)                                        | 1 (0-2)                                     | 3 (2-4)                       | 4 (3-5)                            | 3 (2-4)           | 3 (2-4)               | 4 (2-5)                  | 2 (0-4)                                              |
| 0                                                    | 147 (48.7)                                  | 271 (19.2)                    | 0                                  | 317 (7.7)         | 1059 (6.6)            | 241 (6.0)                | 15,957 (26.4)                                        |
| 1-2                                                  | 102 (33.8)                                  | 270 (19.2)                    | 489 (13.9)                         | 1119 (27.3)       | 3671 (22.8)           | 824 (20.6)               | 17,513 (29.0)                                        |
| ≥3                                                   | 53 (17.5)                                   | 867 (61.6)                    | 3019 (86.1)                        | 2665 (65.0)       | 11,349 (70.6)         | 2940 (73.4)              | 26,891 (44.6)                                        |
| HAS-BLED <sup>#</sup>                                |                                             |                               |                                    |                   |                       |                          |                                                      |
| Median (IQR*)                                        | 2 (1-3)                                     | 2 (1-3)                       | 3 (2-3)                            | 2 (1-3)           | 2 (1-3)               | 2 (2-3)                  | 2 (1-3)                                              |
| 0                                                    | 0                                           | 228 (16.2)                    | 102 (2.9)                          | 229 (5.6)         | 745 (4.6)             | 175 (4.4)                | 12,875 (21.3)                                        |
| 1-2                                                  | 211 (69.9)                                  | 756 (53.7)                    | 1424 (40.6)                        | 2265 (55.2)       | 8795 (54.7)           | 1924 (48.0)              | 31,914 (52.9)                                        |
| ≥3                                                   | 91 (30.1)                                   | 424 (30.1)                    | 1982 (56.5)                        | 1607 (39.2)       | 6539 (40.7)           | 1906 (47.6)              | 15,572 (25.8)                                        |

| Pharmacotherapy, n (%) |           |            |            |            |             |            |               |
|------------------------|-----------|------------|------------|------------|-------------|------------|---------------|
| Amiodarone             | ≤3        | 14 (1.0)   | 259 (7.4)  | 262 (6.4)  | 361 (2.2)   | 278 (6.9)  | 1133 (1.9)    |
| Digoxin                | 38 (12.6) | 398 (28.3) | 784 (22.3) | 782 (19.1) | 5210 (32.4) | 828 (20.7) | 10,336 (17.1) |
| Flecainide             | 0         | 8 (0.6)    | 8 (0.2)    | 10 (0.2)   | 30 (0.2)    | 5 (0.1)    | 786 (1.3)     |

\*IQR: interquartile range. †COPD: chronic obstructive pulmonary disease. ‡IHD: ischemic heart disease. §PAD: peripheral artery disease. ||CHA<sub>2</sub>DS<sub>2</sub>-VASc: Risk score for stroke: congestive heart failure/LV function, hypertension, age 65-74 years, age>74 years (2 points), diabetes, stroke/TIA/systemic embolism (2 points), vascular disease, sex category (female); #HAS-BLED: Risk score for bleeding: hypertension, abnormal renal/liver function, history of stroke, history of bleeding, INR (left out due to missing data), age>65 years, drug consumption with antiplatelet agents/non-steroidal inflammatory drugs, alcohol abuse.

For peer review only

**Online Figure 1: Adjusted Hazard ratios of long-term outcomes in patients with AF with and without a secondary precipitant.**  
**Adjustments: age groups, peripheral artery disease, heart failure, hypertension, prior thromboembolic event, ischemic heart disease, chronic kidney disease, diabetes, prior bleeding event, cancer, antiarrhythmic therapy (amiodarone, digoxin, flecainide) at the index date and OAC therapy status as a time-dependent variable.**

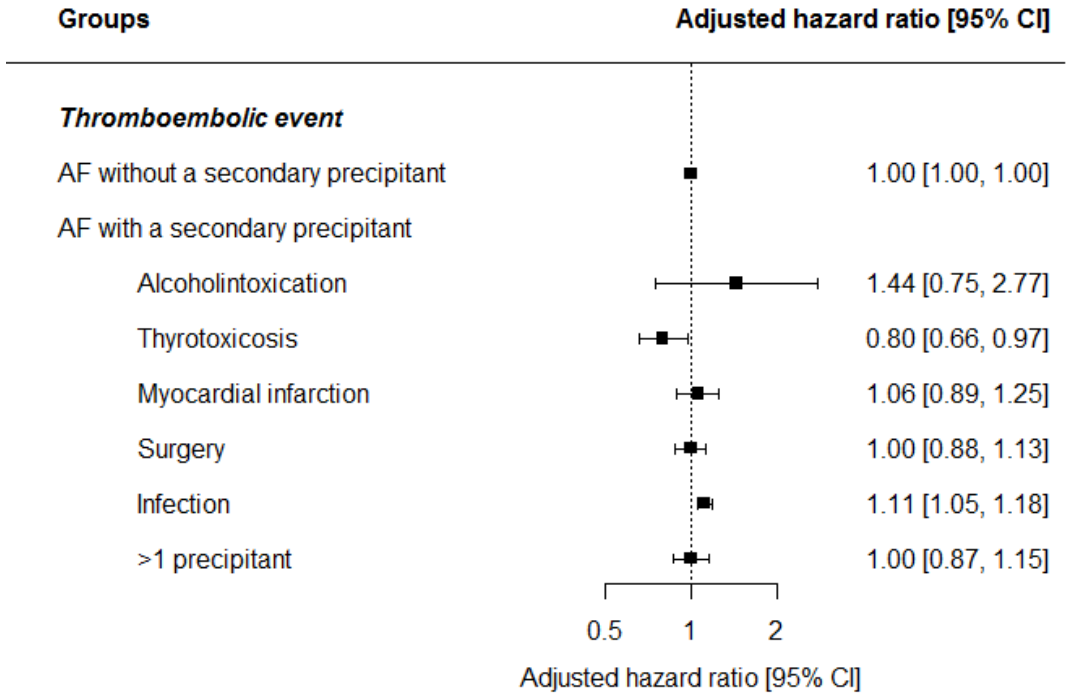

view only

## STROBE Statement—checklist of items that should be included in reports of observational studies

|                              | Item No | Recommendation                                                                                                                                                                                                                                                                                                                                                                                                                                                                                                                                                                                                                                                                                                                     |
|------------------------------|---------|------------------------------------------------------------------------------------------------------------------------------------------------------------------------------------------------------------------------------------------------------------------------------------------------------------------------------------------------------------------------------------------------------------------------------------------------------------------------------------------------------------------------------------------------------------------------------------------------------------------------------------------------------------------------------------------------------------------------------------|
| <b>Title and abstract</b>    | 1       | (a) Indicate the study's design with a commonly used term in the title or the abstract<br>YES, p.1 and 3.<br><br>(b) Provide in the abstract an informative and balanced summary of what was done and what was found<br>YES, p. 3.                                                                                                                                                                                                                                                                                                                                                                                                                                                                                                 |
| <b>Introduction</b>          |         |                                                                                                                                                                                                                                                                                                                                                                                                                                                                                                                                                                                                                                                                                                                                    |
| Background/rationale         | 2       | Explain the scientific background and rationale for the investigation being reported<br>YES, p. 5                                                                                                                                                                                                                                                                                                                                                                                                                                                                                                                                                                                                                                  |
| Objectives                   | 3       | State specific objectives, including any prespecified hypotheses<br>YES, p. 5                                                                                                                                                                                                                                                                                                                                                                                                                                                                                                                                                                                                                                                      |
| <b>Methods</b>               |         |                                                                                                                                                                                                                                                                                                                                                                                                                                                                                                                                                                                                                                                                                                                                    |
| Study design                 | 4       | Present key elements of study design early in the paper<br>YES, p. 5-7.                                                                                                                                                                                                                                                                                                                                                                                                                                                                                                                                                                                                                                                            |
| Setting                      | 5       | Describe the setting, locations, and relevant dates, including periods of recruitment, exposure, follow-up, and data collection<br>YES, p. 5-7.                                                                                                                                                                                                                                                                                                                                                                                                                                                                                                                                                                                    |
| Participants                 | 6       | (a) <i>Cohort study</i> —Give the eligibility criteria, and the sources and methods of selection of participants. Describe methods of follow-up<br>YES, p. 6-7.<br><i>Case-control study</i> —Give the eligibility criteria, and the sources and methods of case ascertainment and control selection. Give the rationale for the choice of cases and controls<br><i>Cross-sectional study</i> —Give the eligibility criteria, and the sources and methods of selection of participants<br><br>(b) <i>Cohort study</i> —For matched studies, give matching criteria and number of exposed and unexposed<br>YES, p. 8.<br><i>Case-control study</i> —For matched studies, give matching criteria and the number of controls per case |
| Variables                    | 7       | Clearly define all outcomes, exposures, predictors, potential confounders, and effect modifiers. Give diagnostic criteria, if applicable<br>YES, p. 7-8. Figure 3. Specification of diagnosis can be found in the Online Table 1.                                                                                                                                                                                                                                                                                                                                                                                                                                                                                                  |
| Data sources/<br>measurement | 8*      | For each variable of interest, give sources of data and details of methods of assessment (measurement). Describe comparability of assessment methods if there is more than one group<br>YES, p. 5-6 and eTable 1.                                                                                                                                                                                                                                                                                                                                                                                                                                                                                                                  |
| Bias                         | 9       | Describe any efforts to address potential sources of bias<br>YES, p. 8.                                                                                                                                                                                                                                                                                                                                                                                                                                                                                                                                                                                                                                                            |
| Study size                   | 10      | Explain how the study size was arrived at<br>YES, p. 6-7, figure 1.                                                                                                                                                                                                                                                                                                                                                                                                                                                                                                                                                                                                                                                                |
| Quantitative variables       | 11      | Explain how quantitative variables were handled in the analyses. If applicable, describe which groupings were chosen and why                                                                                                                                                                                                                                                                                                                                                                                                                                                                                                                                                                                                       |

1  
2  
3  
4  
5  
6  
7  
8  
9  
10  
11  
12  
13  
14  
15  
16  
17  
18  
19  
20  
21  
22  
23  
24  
25  
26  
27  
28  
29  
30  
31  
32  
33  
34  
35  
36  
37  
38  
39  
40  
41  
42  
43  
44  
45  
46  
47  
48  
49  
50  
51  
52  
53  
54  
55  
56  
57  
58  
59  
60

YES, p. 6-7.

Statistical methods

12

(a) Describe all statistical methods, including those used to control for confounding

YES, p. 7-8.

(b) Describe any methods used to examine subgroups and interactions

YES, p. 7-8.

(c) Explain how missing data were addressed

No missing data

(d) *Cohort study*—If applicable, explain how loss to follow-up was addressed

No loss to follow-up.

*Case-control study*—If applicable, explain how matching of cases and controls was addressed

*Cross-sectional study*—If applicable, describe analytical methods taking account of sampling strategy

(e) Describe any sensitivity analyses

YES, p. 7.

Continued on next page



1  
2  
3  
4  
5  
6  
7  
8  
9  
10  
11  
12  
13  
14  
15  
16  
17  
18  
19  
20  
21  
22  
23  
24  
25  
26  
27  
28  
29  
30  
31  
32  
33  
34  
35  
36  
37  
38  
39  
40  
41  
42  
43  
44  
45  
46  
47  
48  
49  
50  
51  
52  
53  
54  
55  
56  
57  
58  
59  
60

## Results

|                          |     |                                                                                                                                                                                                                                |
|--------------------------|-----|--------------------------------------------------------------------------------------------------------------------------------------------------------------------------------------------------------------------------------|
| Participants             | 13* | (a) Report numbers of individuals at each stage of study—eg numbers potentially eligible, examined for eligibility, confirmed eligible, included in the study, completing follow-up, and analysed<br>YES, p. 8-9 and Figure 1. |
|                          |     | (b) Give reasons for non-participation at each stage<br>YES, p. 8-9 and Figure 1.                                                                                                                                              |
|                          |     | (c) Consider use of a flow diagram<br>YES, Figure 1                                                                                                                                                                            |
| Descriptive data         | 14* | (a) Give characteristics of study participants (eg demographic, clinical, social) and information on exposures and potential confounders<br>YES, p. 9, Table 1.                                                                |
|                          |     | (b) Indicate number of participants with missing data for each variable of interest<br>No missing data                                                                                                                         |
|                          |     | (c) <i>Cohort study</i> —Summarise follow-up time (eg, average and total amount)<br>YES, Figure 2.                                                                                                                             |
| Outcome data             | 15* | <i>Cohort study</i> —Report numbers of outcome events or summary measures over time<br>YES, p. 10 and Figure 2, 3.                                                                                                             |
|                          |     | <i>Case-control study</i> —Report numbers in each exposure category, or summary measures of exposure                                                                                                                           |
|                          |     | <i>Cross-sectional study</i> —Report numbers of outcome events or summary measures                                                                                                                                             |
| Main results             | 16  | (a) Give unadjusted estimates and, if applicable, confounder-adjusted estimates and their precision (eg, 95% confidence interval). Make clear which confounders were adjusted for and why they were included<br>YES, Figure 3. |
|                          |     | (b) Report category boundaries when continuous variables were categorized<br>Continuous variables were not categorized.                                                                                                        |
|                          |     | (c) If relevant, consider translating estimates of relative risk into absolute risk for a meaningful time period                                                                                                               |
| Other analyses           | 17  | Report other analyses done—eg analyses of subgroups and interactions, and sensitivity analyses<br>YES, p. 11.                                                                                                                  |
| <b>Discussion</b>        |     |                                                                                                                                                                                                                                |
| Key results              | 18  | Summarise key results with reference to study objectives<br>YES, p. 11.                                                                                                                                                        |
| Limitations              | 19  | Discuss limitations of the study, taking into account sources of potential bias or imprecision. Discuss both direction and magnitude of any potential bias<br>YES, p. 13-14.                                                   |
| Interpretation           | 20  | Give a cautious overall interpretation of results considering objectives, limitations, multiplicity of analyses, results from similar studies, and other relevant evidence<br>YES, p. 12-13.                                   |
| Generalisability         | 21  | Discuss the generalisability (external validity) of the study results<br>YES, p. 14.                                                                                                                                           |
| <b>Other information</b> |     |                                                                                                                                                                                                                                |
| Funding                  | 22  | Give the source of funding and the role of the funders for the present study and, if applicable, for the original study on which the present article is based                                                                  |

1  
2 YES, p. 14.  
3

4 \*Give information separately for cases and controls in case-control studies and, if applicable, for exposed and  
5 unexposed groups in cohort and cross-sectional studies.  
6  
7

8 **Note:** An Explanation and Elaboration article discusses each checklist item and gives methodological background and  
9 published examples of transparent reporting. The STROBE checklist is best used in conjunction with this article (freely  
10 available on the Web sites of PLoS Medicine at <http://www.plosmedicine.org/>, Annals of Internal Medicine at  
11 <http://www.annals.org/>, and Epidemiology at <http://www.epidem.com/>). Information on the STROBE Initiative is  
12 available at [www.strobe-statement.org](http://www.strobe-statement.org).  
13  
14  
15  
16  
17  
18  
19  
20  
21  
22  
23  
24  
25  
26  
27  
28  
29  
30  
31  
32  
33  
34  
35  
36  
37  
38  
39  
40  
41  
42  
43  
44  
45  
46  
47  
48  
49  
50  
51  
52  
53  
54  
55  
56  
57  
58  
59  
60

# BMJ Open

## Comparative thromboembolic risk in atrial fibrillation with and without a secondary precipitant– a Danish nationwide cohort study

|                                 |                                                                                                                                                                                                                                                                                                                                                                                                                                                                                                                                                                                                                                                 |
|---------------------------------|-------------------------------------------------------------------------------------------------------------------------------------------------------------------------------------------------------------------------------------------------------------------------------------------------------------------------------------------------------------------------------------------------------------------------------------------------------------------------------------------------------------------------------------------------------------------------------------------------------------------------------------------------|
| Journal:                        | <i>BMJ Open</i>                                                                                                                                                                                                                                                                                                                                                                                                                                                                                                                                                                                                                                 |
| Manuscript ID                   | bmjopen-2018-028468.R2                                                                                                                                                                                                                                                                                                                                                                                                                                                                                                                                                                                                                          |
| Article Type:                   | Original research                                                                                                                                                                                                                                                                                                                                                                                                                                                                                                                                                                                                                               |
| Date Submitted by the Author:   | 30-Jul-2019                                                                                                                                                                                                                                                                                                                                                                                                                                                                                                                                                                                                                                     |
| Complete List of Authors:       | Gundlund, A; Herlev and Gentofte Hospital, K umlner, Thomas; Herlev and Gentofte Hospital<br>Bonde, Anders; Herlev and Gentofte Hospital<br>Butt, Jawad; Rigshospitalet, Department of Cardiology<br>Gislason, Gunnar; Herlev and Gentofte Hospital<br>Torp-Pedersen, Christian; Aalborg University, Department of Health Science and Technology; Aalborg University Hospital , Department of Clinical Epidemiology<br>K ober, Lars; Rigshospitalet, Department of Cardiology - The Heart Centre<br>Olesen, Jonas; Copenhagen University Hospital Gentofte, Department of Cardiology<br>Fosb øl, Emil; Rigshospitalet, Department of Cardiology |
| <b>Primary Subject Heading</b>: | Cardiovascular medicine                                                                                                                                                                                                                                                                                                                                                                                                                                                                                                                                                                                                                         |
| Secondary Subject Heading:      | Epidemiology                                                                                                                                                                                                                                                                                                                                                                                                                                                                                                                                                                                                                                    |
| Keywords:                       | Cardiac Epidemiology < CARDIOLOGY, Thromboembolism < CARDIOLOGY, Pacing & electrophysiology < CARDIOLOGY                                                                                                                                                                                                                                                                                                                                                                                                                                                                                                                                        |
|                                 |                                                                                                                                                                                                                                                                                                                                                                                                                                                                                                                                                                                                                                                 |

SCHOLARONE™  
Manuscripts

1  
2  
3  
4 1 **Comparative thromboembolic risk in atrial fibrillation with and without a**  
5  
6  
7 2 **secondary precipitant– a Danish nationwide cohort study**  
8

9  
10 3 Anna Gundlund<sup>1</sup>, MD, PhD; Thomas Kümler<sup>2</sup>, MD, PhD; Anders Nissen Bonde<sup>1</sup>, MD; Jawad H.  
11  
12 4 Butt, MD<sup>6</sup>; Gunnar H. Gislason<sup>1,3,4</sup>, MD, PhD; Christian Torp-Pedersen<sup>5</sup>, MD, DMSc; Lars Køber<sup>6</sup>,  
13  
14 5 MD, DMSc; Jonas Bjerring Olesen<sup>1</sup>, MD, PhD; Emil Loldrup Fosbøl<sup>6</sup>, MD, PhD  
15  
16 6

17  
18  
19 7 **Institution**

20  
21 8 Department of Cardiology, Research Unit 1, Copenhagen University Hospital Herlev-Gentofte,  
22  
23 9 Kildegaardsvej 28, 2900 Hellerup, Denmark  
24  
25

26 10  
27  
28 11 **Affiliations**

29  
30 12 1: Department of Cardiology, Research Unit 1, Copenhagen University Hospital Herlev-Gentofte,  
31  
32 13 Hellerup, Denmark  
33  
34

35 14 2: Department of Cardiology, Copenhagen University Hospital Herlev-Gentofte, Herlev, Denmark  
36

37 15 3: The Danish Heart Foundation, Copenhagen, Denmark  
38

39 16 4: The National Institute of Public Health, University of Southern Denmark  
40

41 17 5: Department of Health, Science and Technology, Aalborg University and departments of  
42  
43 18 Cardiology and Epidemiology/Biostatistics, Aalborg University Hospital, Denmark  
44  
45

46 19 6: Department of Cardiology, University Hospital of Copenhagen, Rigshospitalet  
47  
48  
49 20

50  
51 21 **Corresponding author:**

52 22 Anna Gundlund, MD, PhD  
53

54 23 Department of Cardiology, Research Unit 1, Copenhagen University Hospital Herlev-Gentofte,  
55  
56 24 Hellerup, Denmark, Post 635  
57  
58  
59  
60

1  
2  
3  
4 1 Tel: 0045 50907119  
5

6 2 FAX: 38677642  
7

8  
9 3 Email: annagundlund@gmail.com  
10  
11  
12  
13  
14  
15  
16  
17  
18  
19  
20  
21  
22  
23  
24  
25  
26  
27  
28  
29  
30  
31  
32  
33  
34  
35  
36  
37  
38  
39  
40  
41  
42  
43  
44  
45  
46  
47  
48  
49  
50  
51  
52  
53  
54  
55  
56  
57  
58  
59  
60

For peer review only

1  
2  
3  
4 1 **Abstract:** 292 words (max 300 words)  
5

6 2 Objectives: We compared long-term outcomes in patients with atrial fibrillation (AF) with and  
7  
8  
9 3 without a secondary precipitant.  
10

11 4 Design and setting: Retrospective cohort study based on Danish nationwide registries.  
12

13 5 Participants: Patients with AF with and without secondary precipitants (1996-2015) were matched  
14  
15  
16 6 1:1 according to age, sex, calendar year, CHA<sub>2</sub>DS<sub>2</sub>-VASc score, and oral anticoagulation therapy  
17  
18 7 (OAC) therapy, resulting in a cohort of 39,723 patients with AF with a secondary precipitant and  
19  
20 8 the same number of patients with AF without a secondary precipitant. Secondary precipitants  
21  
22  
23 9 included alcohol intoxication, thyrotoxicosis, myocardial infarction, surgery, and infection in  
24  
25 10 conjunction with AF.  
26

27 11 Primary and secondary outcomes: The primary outcome in this study was thromboembolic events.  
28  
29  
30 12 Secondary outcomes included AF re-hospitalization and death. Long-term risks of outcomes were  
31  
32 13 examined by multivariable Cox regression analysis.  
33

34 14 Results: The most common precipitants were infection (55.0%), surgery (13.2%), and myocardial  
35  
36 15 infarction (12.0%). The 5-year absolute risk of thromboembolic events (taking death into account as  
37  
38  
39 16 a competing risk) in patients with AF grouped according to secondary precipitants were 8.3%  
40  
41 17 (alcohol intoxication), 8.5% (thyrotoxicosis), 12.1% (myocardial infarction), 11.6% (surgery),  
42  
43 18 12.2% (infection), 10.1% (>1 precipitant), and 12.3% (no secondary precipitant). In the  
44  
45  
46 19 multivariable analyses, AF with a secondary precipitant was associated with the same or an even  
47  
48 20 higher thromboembolic risk than AF without a secondary precipitant. One exception was patients  
49  
50 21 with AF and thyrotoxicosis: those not initiated on OAC therapy carried a lower thromboembolic  
51  
52 22 risk the 1<sup>st</sup> year of follow up than matched patients with AF without a secondary precipitant and no  
53  
54  
55 23 OAC therapy.  
56  
57  
58  
59  
60

1  
2  
3  
4 1 Conclusions: In general, AF with a secondary precipitant was associated with the same  
5  
6 2 thromboembolic risk as AF without a secondary precipitant. Consequently, this study highlights the  
7  
8 3 need for more research regarding the long-term management of patients with AF associated with a  
9  
10 4 secondary precipitant.  
11  
12

13 5 Key words: Secondary precipitant, reversible atrial fibrillation, recurrence  
14  
15  
16 6

17  
18  
19  
20  
21  
22  
23  
24  
25  
26  
27  
28  
29  
30  
31  
32  
33  
34  
35  
36  
37  
38  
39  
40  
41  
42  
43  
44  
45  
46  
47  
48  
49  
50  
51  
52  
53  
54  
55  
56  
57  
58  
59  
60

For peer review only

1  
2  
3  
4 **1 Article summary: strengths and limitations of this study**  
5

- 6  
7 2 • The study was based on high-quality nationwide registries with many years of follow up.  
8  
9 3 • Complete follow-up was possible  
10  
11 4 • Only associations could be drawn because of the retrospective and non-randomized design.  
12  
13  
14 5 • AF with and without a secondary precipitant were defined from diagnosis codes at discharge  
15  
16 6 • We had no data on electrocardiograms at discharge  
17  
18  
19 7



## 1 **Introduction**

2 The etiology of atrial fibrillation (AF) remains partly unknown. Studies have shown, that an  
3 inflammatory reaction inside the atria always precipitate AF.(1) However, in clinical practice, AF  
4 may occur as an isolated event or together with a secondary precipitant. AF is associated with a  
5 fivefold increased risk of ischemic stroke, and detailed treatment strategies regarding stroke  
6 prophylaxis in patients with AF occurring without secondary precipitants exist in both European  
7 and American treatment guidelines.(2–5)] In contrast, there is no consensus regarding stroke  
8 prophylaxis in patients with AF occurring with a secondary precipitant. Previous guidelines stated  
9 that AF occurring secondary to another precipitant usually will terminate without recurrence.(2) In  
10 current guidelines, however, this statement has been omitted, and the need for data regarding AF  
11 associated with a secondary precipitant highlighted.(4,5) Studies investigating long-term outcomes  
12 in AF associated with a secondary precipitant are sparse and data differentiating between different  
13 secondary precipitants and taking oral anticoagulation (OAC) therapy into account are missing.  
14 To address this lack in current knowledge, we aimed to compare long-term outcomes including  
15 thromboembolic events, AF re-hospitalization, and death in patients with AF with a secondary  
16 precipitant (incl. alcohol, intoxication, thyrotoxicosis, myocardial infarction, surgery, and infection)  
17 and patients with AF without a secondary precipitant. Further, we were able to differentiate  
18 between patients receiving and not receiving stroke prophylaxis with OAC therapy.

## 19 **Materials and methods**

### 20 *Data sources*

21 In Denmark, healthcare is tax-financed and with equal availability regardless of socioeconomic  
22 status. Date of birth, date and cause of death, emigration and immigration status, diagnosis and  
23 surgery codes etc. from all hospital contacts, fulfilled prescriptions of medicine, and several other  
24

1  
2  
3  
4  
5  
6  
7  
8  
9  
10  
11  
12  
13  
14  
15  
16  
17  
18  
19  
20  
21  
22  
23  
24  
25  
26  
27  
28  
29  
30  
31  
32  
33  
34  
35  
36  
37  
38  
39  
40  
41  
42  
43  
44  
45  
46  
47  
48  
49  
50  
51  
52  
53  
54  
55  
56  
57  
58  
59  
60

parameters are registered in different nationwide registries. Since all Danish citizens are provided a unique personal identifier code at birth (or immigration), data from the registries can be crosslinked on an individual level. We linked data from the following registries: The Danish Civil Registration System,(6) The Danish National Patient Registry (diagnoses were registered in terms of the International Classification of Diseases (ICD) system (ICD-8 until 1994 and in terms of ICD-10 thereafter)),(7) The Danish Register of Causes of Death,(8) and the Danish National Registry of Medicinal Statistics (medicine were registered according to the Anatomical Therapeutic Chemical classification system (ATC)).(9)

### *Study population*

The patient selection is depicted in Figure 1. We included all Danes diagnosed and admitted to a Danish hospital with AF for the first time between 1996 and 2015. Patients <18 years or >100 years and those with valvular AF (defined as AF without: rheumatic valve disease of aortic valve or mitral valve or prosthetic heart valve (any valve)) were excluded. Since there was a possibility that some of the patients had been diagnosed with AF at their general practitioner before their hospital admission, we excluded those who previously had fulfilled a prescription of antiarrhythmic therapy or rate-controlling drugs (incl. amiodarone, flecainide, and digoxin) and those who had fulfilled a prescription of OAC therapy up to 100 days before their hospital admission. Further, patients who died or had a thromboembolic event during the hospital admission or a constructed blanking period of 4 weeks from hospital discharge to the index date were excluded.

Patients were grouped in those with and without a secondary precipitant. Patients who had a diagnosis of one of the following precipitants from their AF hospital admission were defined as patients with a secondary precipitant: alcohol intoxication, thyrotoxicosis, myocardial infarction, and infection. Also, patients who were diagnosed with AF after, but during the same hospital

1 admission they received surgery were defined as having AF with a secondary precipitant. We  
2 restricted the population of patients with AF without a secondary precipitant to patients with AF  
3 without a diagnosis of a secondary precipitant from their hospital admission. Patients with AF with  
4 and without a secondary precipitant were matched 1:1 by incidence density sampling according to  
5 age (allowing a difference of up to two years), sex, calendar year (allowing a difference up to two  
6 years), CHA<sub>2</sub>DS<sub>2</sub>-VASc group (0, 1-2, >2) and OAC therapy status at the index date. Consequently,  
7 each case was matched with a control diagnosed at the same time and in the same age with AF.  
8 Further, the control had the same sex and was categorized in the same CHA<sub>2</sub>DS<sub>2</sub>-VASc group as  
9 the case. These patients comprised the study population. We used a previously described function to  
10 perform the match.(10)

### 11 12 *Long-term outcomes*

13 The index date was defined 4 weeks from AF hospital discharge. Initiation of OAC therapy and  
14 antiarrhythmic and rate controlling drugs was assessed during this blanking period from discharge  
15 to index date. Patients were followed from the index date and until the first event of the following:  
16 an outcome of interest, death, 5 years from the index date, emigration, or June 30, 2015. The  
17 primary outcome of interest was thromboembolic events (a composite of ischemic stroke, transient  
18 ischemic attack (TIA), and systemic thrombosis or embolism) while secondary outcomes included  
19 AF rehospitalization and all-cause death. AF rehospitalization was defined as a hospitalization with  
20 AF as the primary discharge diagnosis. The diagnoses of AF, ischemic stroke, and myocardial  
21 infarction have been validated in the Danish registries with positive predictive values of 93%, 97%,  
22 and 100%, respectively.(11,12)

## 1 2 3 4 1 *Statistics*

5  
6 2 Kaplan Meier curves for death were drawn and cumulative incidences of thromboembolic events  
7  
8  
9 3 (with incorporated competing risk of death) calculated using the Aalen Johansen estimator. The  
10  
11 4 Log-Rank test and the Gray's test were used to test for differences in the cumulative incidence of  
12  
13 5 long-term outcomes. Cox regression analyses were performed to calculate hazard ratios (HR) of  
14  
15 6 long-term outcomes in patients with AF with and without a secondary precipitant according to OAC  
16  
17 7 therapy at the index date. All analyzes were performed on the matched population. The multivariate  
18  
19 8 models were adjusted for other potential confounders than the matching criteria (incl. comorbidities  
20  
21 9 at the index date (incl. peripheral artery disease, heart failure, hypertension, prior thromboembolic  
22  
23 10 event, ischemic heart disease, chronic kidney disease, diabetes, prior bleeding event, cancer) and  
24  
25 11 antiarrhythmic and rate-controlling therapy during the blanking period (amiodarone, digoxin,  
26  
27 12 flecainide)). The analyses took matching variables into account and each group of patients with AF  
28  
29 13 with a secondary precipitant was compared with its respective matches from the matching  
30  
31 14 procedure. The models were tested for the assumption of proportional hazards. For specification of  
32  
33 15 diagnosis codes and ATC-codes please see Online Table 1. A P-value <0.05 was considered  
34  
35 16 statistically significant. All statistical analyses were performed in SAS statistical software version  
36  
37 17 9.4 or R.(13)  
38  
39  
40  
41  
42  
43  
44

## 45 19 *Other analyses*

46  
47  
48 20 Analyses of long-term outcomes were also performed on a non-matched population including all  
49  
50 21 patients available before the matching (Figure 1). To account for changes in OAC therapy status  
51  
52 22 over time, we did a sensitivity analysis not stratifying patients with regard to their OAC therapy  
53  
54 23 status at the index date, but instead adjusting for OAC therapy status as a time-dependent variable.  
55  
56  
57  
58  
59  
60

1  
2  
3  
4 1 Consequently, new initiations and discontinuations were taking into account. The method used, has  
5  
6 2 been used and described previously.(14–16)  
7  
8

### 9 3 10 11 4 *Ethics*

12  
13 5 Approval from the Research Ethics Committee System is not required in retrospective registry-  
14  
15 6 based studies in Denmark. The Danish Data Protection Agency approved use of data for this study  
16  
17 7 (ret.no: 2007-58-0015 / GEH-2014-013 I-Suite no: 02731).  
18  
19  
20 8

### 21 22 23 9 *Patient and Public Involvement*

24  
25 10 This was a retrospective study based on administrative registries. Patients and the public were not  
26  
27 11 involved in the development of the study.  
28  
29  
30 12

### 31 32 13 *Data availability statement*

33  
34 14 This study was based on deidentified data about the entire Danish population. Data are not  
35  
36 15 available.  
37  
38  
39 16

### 40 41 17 *Contributorship statement*

42  
43 18 The study idea was conceived by AG, TK, and ELF., study design was developed by AG, TK, JBO,  
44  
45 19 ANB, JHB, GHG, CTP, LK, and ELF, data analyses were made by AG. AG drafted the first version  
46  
47 20 of the paper and all authors participated in the critical discussions and interpretation of findings. All  
48  
49 21 authors have participated in the revisions of the draft and have approved the final version.  
50  
51  
52 22

## 53 54 23 **Results**

### 55 56 24 *Study population* 57 58 59 60

1  
2  
3  
4 1 As shown in Figure 1, the most common secondary precipitant was infection (21,824 patients,  
5 55.0%). Further, 335 (0.8%) patients had a concurrent alcohol intoxication, 2507 (6.3%) had  
6 2  
7 3 thyrotoxicosis, 4773 (12.0%) had acute myocardial infarction, 5229 (13.2%) had underwent  
8 4  
9 5 surgery, and 5055 (12.7%) had >1 precipitant. Of those with >1 precipitant, 4788 (94.7%) patients  
10 6  
11 7 had two secondary precipitants, while 267 (5.3%) had three or four secondary precipitants.  
12 8  
13 9 Infection and surgery was the most common combination of secondary precipitants. The patients  
14 10  
15 11 with >1 precipitant were grouped in one group, and were not included in the other groups of  
16 12  
17 13 patients with AF with a secondary precipitant. During the blanking period, 14% of the patients with  
18 14  
19 15 AF and a secondary precipitant and 2% of the patients with AF without a secondary precipitant  
20 16  
21 17 died, while 5% and 2%, respectively, had a thromboembolic event. These patients were excluded  
22 18  
23 19 before the matching.  
24 20  
25 21  
26 22  
27 23  
28 24  
29 25  
30 26  
31 27  
32 28  
33 29  
34 30  
35 31  
36 32  
37 33  
38 34  
39 35  
40 36  
41 37  
42 38  
43 39  
44 40  
45 41  
46 42  
47 43  
48 44  
49 45  
50 46  
51 47  
52 48  
53 49  
54 50  
55 51  
56 52  
57 53  
58 54  
59 55  
60 56

### *Baseline characteristics*

34 14 Baseline characteristics of the matched study population are shown in Table 1. In general, patients  
35 15  
36 16 with AF with a secondary precipitant had more comorbidities than patients with AF without a  
37 17  
38 18 secondary precipitant. Baseline characteristics of the non-matched population according to OAC  
39 19  
40 20 therapy at the index date are shown in online Table 2 and 3. Especially those with AF and  
41 21  
42 22 myocardial infarction, surgery, infection, and >1 precipitant were older, had more comorbidities,  
43 23  
44 24 and higher risk scores for stroke and bleeding compared with patients with AF without a secondary  
45 25  
46 26 precipitant. Among the patients with AF with a secondary precipitant (non-matched study  
47 27  
48 28 population), 9.9% with alcohol intoxication, 43.9% with thyrotoxicosis, 27.2% with myocardial  
49 29  
50 30 infarction, 21.9% with surgery, 27.1% with infection, and 21.4% with >1 precipitant received OAC  
51 31  
52 32 therapy at the index date, respectively. Among patients with AF without a secondary precipitant,  
53 33  
54 34 38.5% received OAC therapy at the index date. In general for patients with AF with and without a  
55 35  
56 36  
57 37  
58 38  
59 39  
60 40

1  
2  
3  
4 1 secondary precipitant, those initiated on OAC therapy suffered from less cancer, chronic kidney  
5  
6 2 disease, peripheral artery disease, and had fewer previous bleeding events than those not initiated  
7  
8  
9 3 on OAC therapy. On the other hand, they were more likely to suffer from stroke risk factors (incl.  
10  
11 4 diabetes, heart failure, ischemic heart disease, and hypertension) than those not initiated on OAC  
12  
13 5 therapy. During the first year after the index date, 9.9% and 17.3% of patients with AF with and  
14  
15 6 without a secondary precipitant, respectively, had a new hospital admission with AF. One year after  
16  
17 7 the index date, 19.8% and 32.7% of the patients with AF with and without a secondary precipitant,  
18  
19 8 respectively, were in OAC therapy and 22.3% and 21.8% of the patients with AF with and without  
20  
21 9 a secondary precipitant, respectively, were in antiarrhythmic therapy.  
22  
23  
24  
25  
26  
27  
28

### 27 11 *Long-term outcomes*

29 12 Number of events, incidence rates, and crude and adjusted hazard ratios (HRs) of thromboembolic  
30  
31 13 events and death in AF patients with a secondary precipitant compared with AF patients without a  
32  
33 14 secondary precipitant initiated and not initiated on OAC therapy at the index date are presented in  
34  
35 15 Figure 2. With few exceptions, AF with a secondary precipitant was associated with the same  
36  
37 16 thromboembolic risk as AF without a secondary precipitant. Regardless of OAC therapy status at  
38  
39 17 the index date, AF with infection was associated with a significantly increased risk of  
40  
41 18 thromboembolic events compared with AF without a secondary precipitant. Among those not  
42  
43 19 initiated on OAC therapy, AF with thyrotoxicosis was associated with a significantly lower risk of  
44  
45 20 thromboembolic events compared with AF without a secondary precipitant. In those initiated on  
46  
47 21 OAC therapy, no differences in thromboembolic risk was observed between patients with AF and  
48  
49 22 thyrotoxicosis and patients with AF without a secondary precipitant. All subgroups of AF with a  
50  
51 23 secondary precipitant were associated with a significantly lower risk of AF re-hospitalization  
52  
53 24 compared with AF without a secondary precipitant (Figure 2).  
54  
55  
56  
57  
58  
59  
60

1  
2  
3  
4  
5  
6  
7  
8  
9  
10  
11  
12  
13  
14  
15  
16  
17  
18  
19  
20  
21  
22  
23  
24  
25  
26  
27  
28  
29  
30  
31  
32  
33  
34  
35  
36  
37  
38  
39  
40  
41  
42  
43  
44  
45  
46  
47  
48  
49  
50  
51  
52  
53  
54  
55  
56  
57  
58  
59  
60

1

2 Figure 3 and 4 depicts cumulative incidences of thromboembolic events and death in patients with  
3 AF with and without a secondary precipitant. During follow up, the cumulative incidence of  
4 thromboembolic events (taking death as an competing risk into account) according to type of  
5 secondary precipitant was 8.3% (alcohol intoxication), 8.5% (thyrotoxicosis), 12.1% (myocardial  
6 infarction), 11.6% (surgery), 12.2% (infection), 10.1% (>1 precipitant), and 12.3% (no secondary  
7 precipitant). The cumulative incidence of AF re-hospitalization were 19.6% (alcohol intoxication),  
8 30.8% (thyrotoxicosis), 27.2% (myocardial infarction), 14.8% (surgery), 20.9% (infection), 19.3%  
9 (>1 precipitant), and 34.4% (no secondary precipitant) (not included in the figures).

10 OAC therapy initiation compared with no OAC therapy initiation was associated with a lower  
11 thromboembolic risk in patients with AF with and without a secondary precipitant, although the  
12 results did not reach statistical significance in patients with AF with alcohol intoxication,  
13 thyrotoxicosis, myocardial infarction, and surgery as secondary precipitants (Figure 5).

#### 15 *Other analyses*

16 The long-term risk of thromboembolic events for patients with AF with and without a secondary  
17 precipitant in the non-matched population were comparable to the risks found in the main analysis,  
18 except that AF with thyrotoxicosis reached statistical significance and hence was associated with a  
19 significantly lower risk of thromboembolic events (HR 0.75, 95% CI 0.60-0.95 for those initiated  
20 on OAC therapy and HR 0.77, 95% CI 0.64-0.92 for those not initiated on OAC therapy). Further,  
21 among those initiated on OAC therapy, AF after surgery was associated with an increased risk of  
22 thromboembolic events (HR 1.23, 95% CI 1.01-1.50).

23 The sensitivity analysis, adjusting for OAC therapy status as a time-dependent variable, revealed  
24 results similar to those found in the main analysis (Online Figure 1).



1  
2  
3  
4 15  
6 2 **Discussion**7  
8  
9 3 We examined long-term outcomes in patients with AF with and without a secondary precipitant.10  
11 4 The study had two main findings: first, AF with different secondary precipitants was in general12  
13 5 associated with the same thromboembolic risk as AF without a secondary precipitant. Secondly,14  
15 6 OAC initiation-rates differed significantly according to type of secondary precipitant. Further, OAC16  
17 7 therapy vs. no OAC therapy were associated with a lower thromboembolic risk in those with AF18  
19 8 and infection and >1 precipitant while no significant risk-reduction was seen for patients with AF20  
21 9 with the other secondary precipitants.  
22  
23  
24

25 10

26  
27 11 *Thromboembolic risk*28  
29 12 Despite of lower re-hospitalization rates with AF, AF with a secondary precipitant was in general30  
31 13 associated with the same thromboembolic risk as AF without a secondary precipitant. AF with32  
33 14 thyrotoxicosis was associated with a lower thromboembolic risk compared with AF without a34  
35 15 secondary precipitant. In contrast, AF with infection was associated with an increased36  
37 16 thromboembolic risk compared with AF without a secondary precipitant. This is in accordance with38  
39 17 previous findings.(17–19) In two previous studies, Lubitz et al. and Fauchier et al. examined long-40  
41 18 term outcomes in patients with AF secondary to a reversible precipitant compared with patients42  
43 19 with AF without a secondary precipitant. In both studies, AF secondary to a reversible precipitant44  
45 20 was associated with the same thromboembolic risk as AF without secondary precipitants. However,46  
47 21 both studies were smaller and with patients included before 2012 and 2010, respectively.(20,21) In48  
49 22 summary, our results together with previous studies suggest that AF with a secondary precipitant in50  
51 23 general, and maybe with the exception of AF with thyrotoxicosis, may be considered as similar to52  
53 24 AF without a secondary precipitant with respect to thromboembolic risk.  
54  
55  
56  
57  
58  
59  
60

1  
2  
3  
4 15  
6 2 *OAC therapy*

7  
8  
9 3 OAC therapy showed a tendency towards a lower thromboembolic risk in patients with AF and a  
10  
11 4 secondary precipitant, but did only reach statistical significance for patients with AF and infection  
12  
13 5 and >1 precipitant. Recently, Quon et al. examined risk of thromboembolic events and bleeding in  
14  
15 6 patients with AF and acute coronary syndrome, acute pulmonary disease, and infection according to  
16  
17 7 OAC therapy status after discharge. In that study, OAC therapy was not associated with lower risk  
18  
19 8 of thromboembolic events in patients with AF and the before mentioned precipitants. However, the  
20  
21 9 analyses on long-term outcomes were based on logistic regression analysis, and did therefore not  
22  
23 10 include survival time in the model. Since patients with AF with a secondary precipitant in our study  
24  
25 11 seemed to die at a higher rate than patients with AF without a secondary precipitant, the time  
26  
27 12 perspective is crucial when studying long-term outcomes in this setting.(22) Studies with a clinical  
28  
29 13 randomized design would be able to show whether patients with AF with a secondary precipitant  
30  
31 14 benefit from OAC therapy on the same terms as patients with AF without a secondary precipitant.  
32  
33  
34  
35

36 15

37  
38  
39 16 *OAC treatment-rates*

40  
41 17 The non-matched population allowed us to describe trends in OAC therapy initiation in patients  
42  
43 18 with AF with and without a secondary precipitant. In patients with AF without a secondary  
44  
45 19 precipitant, 38.5% of the patients were initiated on OAC therapy at the index date. This is in  
46  
47 20 accordance with previous findings, taking into account that our study period went back to 1996  
48  
49 21 when treatment rates were lower than today.(23,24) In 2017, Chean et al. assessed current practice  
50  
51 22 of AF among critically ill patients with new-onset AF. The study was based on questionnaires  
52  
53 23 answered by members of the Intensive Care Society in UK. The results revealed that 63.8% of the  
54  
55 24 respondents would not regularly anti-coagulate critically ill patients with new-onset AF. We found  
56  
57  
58  
59  
60

1  
2  
3  
4 1 important differences in OAC therapy initiation rates in patients with AF with a secondary  
5  
6 2 precipitant according to type of precipitant. Patients with alcohol intoxication had the lowest  
7  
8 3 initiation rate of OAC therapy (9.9%). Almost 50% of this patient group had a CHA<sub>2</sub>DS<sub>2</sub>-VASc  
9  
10 4 score of 0 and hence no indication for OAC therapy. Further patients with alcohol abuse may have  
11  
12 5 poor compliance and increased bleeding risk.(25) Consequently, there may be caution among  
13  
14 6 physicians in prescribing OACs for this patient group. In 2011, Traube and colleagues reviewed the  
15  
16 7 literature with respect to thromboembolic risk in patients with AF and thyrotoxicosis. They  
17  
18 8 concluded that OAC therapy should be initiated for those patients who did not have any  
19  
20 9 contraindications for treatment.(26) This could explain the high OAC treatment initiation rates in  
21  
22 10 this patient group (43.9%).  
23  
24  
25  
26  
27  
28  
29

### 30 12 *Limitations*

31  
32 13 First of all, this study was a retrospective registry-based study and hence no causative relationships  
33  
34 14 can be drawn. Our definition of AF with a secondary precipitant was based on diagnosis codes from  
35  
36 15 hospital admissions with AF and a reversible precipitant. Both diagnoses were registered at the  
37  
38 16 discharge date, and therefore we may have included patients in the group of AF with a secondary  
39  
40 17 precipitant who developed AF before the secondary precipitant (e.g. patients admitted with AF who  
41  
42 18 developed infection during their hospital stay), and thereby should have been classified as patients  
43  
44 19 with AF without a secondary precipitant. Moreover, we had no access to patient files, and we did  
45  
46 20 not know the duration of AF or whether the patients were discharged in sinus rhythm or with AF.  
47  
48 21 Also, no data were available with regard to the physicians' considerations when choosing between  
49  
50 22 OAC therapy and no OAC therapy, patients compliance, and measurements of international  
51  
52 23 normalized ratio (INR) and time in therapeutic range for warfarin users. Previous studies have  
53  
54 24 shown an association between an impaired platelet nitric oxide response and recent onset AF and  
55  
56  
57  
58  
59  
60

1  
2  
3  
4  
5  
6  
7  
8  
9  
10  
11  
12  
13  
14  
15  
16  
17  
18  
19  
20  
21  
22  
23  
24  
25  
26  
27  
28  
29  
30  
31  
32  
33  
34  
35  
36  
37  
38  
39  
40  
41  
42  
43  
44  
45  
46  
47  
48  
49  
50  
51  
52  
53  
54  
55  
56  
57  
58  
59  
60

1 that disturbances in nitric oxide function are associated with outcomes (including thromboembolic  
2 events, bleeding events, and death) in AF. Unfortunately, we did not have any information on nitric  
3 oxide levels in our study cohort.(27,28)

4 However, this study was based on a nationwide cohort of patients with many years of follow-up and  
5 data from high-quality registries. It reveals unexpected results that should be considered in future  
6 treatment guidelines for patients with AF and a secondary precipitant.

8 Recent onset of AF is associated with marked impairment of platelet NO response. These findings  
9 may contribute to thromboembolic risk in such patients.

11 nitric oxide signaling, and that the standard scoring systems for thrombo-embolic risk in patients  
12 with AF partially parallel plasma concentrations of the NO synthase inhibitor ADMA

### 15 *Conclusion*

16 In this study we found that patients with AF and a secondary precipitant carried a similar associated  
17 thromboembolic risk as those with AF without a secondary precipitant. Current guidelines lack data  
18 on this subject and our results suggests that AF in relation to known triggers may be considered as  
19 AF in general.

## 1 **Funding**

2 This research received no specific grant from any funding agency in the public, commercial, or not-  
3 for-profit sectors.

## 4 **Conflicts of interest**

5 AG: None. TK: Consultant fees from BMS, Astra Zeneca, Roche, Boehringer-Ingelheim, Bayer,  
6 MSD. JBO: Speaker for Bristol-Myers Squibb, Boehringer Ingelheim, Bayer, and AstraZeneca.  
7 Consultant for Boehringer Ingelheim and Novo Nordisk. Funding for research from Bristol-Myers  
8 Squibb and The Capital Region of Denmark, Foundation for Health Research. ANB: None J.H.B:  
9 None. GHG: Research grants from Bayer, Bristol-Myers Squibb, AstraZeneca and Boehring  
10 Ingelheim. CTP: Consultant fees and research funding from Bayer and Biotronic LK: None. ELF:  
11 Has previously received research funding from Janssen and Janssen and Bristol-Myers Squibb.  
12

## 13 **Author contributions**

14 The study idea was conceived by AG, TK, and ELF, study design was developed by AG, TK, JBO,  
15 ANB, JHB, GHG, CTP, LK, and ELF, data analyses were made by AG. AG drafted the first version  
16 of the paper and all authors participated in the critical discussions and interpretation of findings. All  
17 authors have participated in the revisions of the draft and have approved the final version.  
18

## 19 **Acknowledgements**

20 None.

1  
2  
3  
4  
5  
6  
7  
8  
9  
10  
11  
12  
13  
14  
15  
16  
17  
18  
19  
20  
21  
22  
23  
24  
25  
26  
27  
28  
29  
30  
31  
32  
33  
34  
35  
36  
37  
38  
39  
40  
41  
42  
43  
44  
45  
46  
47  
48  
49  
50  
51  
52  
53  
54  
55  
56  
57  
58  
59  
60

1

2

For peer review only

## References

1. Procter NEK, Stewart S, Horowitz JD. New-onset atrial fibrillation and thromboembolic risk: Cardiovascular syzygy? *Heart Rhythm*. 2016;13(6):1355–61.
2. Fuster V, Rydén LE, Cannom DS, Crijns HJ, Curtis AB, Ellenbogen KA, et al. 2011 ACCF/AHA/HRS focused updates incorporated into the ACC/AHA/ESC 2006 guidelines for the management of patients with atrial fibrillation: a report of the American College of Cardiology Foundation/American Heart Association Task Force on practice guidelines. *Circulation*. 2011 Mar 15;123(10):e269-367.
3. Lip GYH, Lane DA. Stroke prevention in atrial fibrillation: a systematic review. *JAMA*. 2015 May 19;313(19):1950–62.
4. Kirchhof P, Benussi S, Kotecha D, Ahlsson A, Atar D, Casadei B, et al. 2016 ESC Guidelines for the management of atrial fibrillation developed in collaboration with EACTS. *Eur Heart J*. 2016 Oct 7;37(38):2893–962.
5. January CT, Wann LS, Alpert JS, Calkins H, Cleveland JC, Cigarroa JE, et al. 2014 AHA/ACC/HRS Guideline for the Management of Patients With Atrial Fibrillation. *Circulation*. 2014 Dec 2;130(23):e199–267.
6. Pedersen CB. The Danish Civil Registration System. *Scand J Public Health*. 2011 Jan 7;39(7 suppl):22–5.
7. Lynge E, Sandegaard JL, Rebolj M. The Danish National Patient Register. *Scand J Public Health*. 2011 Jan 7;39(7 suppl):30–3.
8. Helweg-Larsen K. The Danish Register of Causes of Death. *Scand J Public Health*. 2011 Jan 7;39(7 suppl):26–9.
9. Kildemoes HW, Sørensen HT, Hallas J. The Danish National Prescription Registry. *Scand J Public Health*. 2011 Jan 7;39(7 suppl):38–41.
10. Locally Written SAS Macros - Division of Biomedical Statistics and Informatics - Mayo Clinic Research [Internet]. Mayo Clinic. [cited 2017 May 3]. Available from: <http://www.mayo.edu/research/departments-divisions/department-health-sciences-research/division-biomedical-statistics-informatics/software/locally-written-sas-macros>
11. Rix TA, Riahi S, Overvad K, Lundbye-Christensen S, Schmidt EB, Joensen AM. Validity of the diagnoses atrial fibrillation and atrial flutter in a Danish patient registry. *Scand Cardiovasc J* SCJ. 2012 Jun;46(3):149–53.
12. Krarup L-H, Boysen G, Janjua H, Prescott E, Truelsen T. Validity of stroke diagnoses in a National Register of Patients. *Neuroepidemiology*. 2007;28(3):150–4.
13. R Core Team. R: A Language and Environment for Statistical Computing [Internet]. [cited 2017 Sep 19]. Available from: <https://www.R-project.org/>
14. Olesen JB, Lip GYH, Kamper A-L, Hommel K, Køber L, Lane DA, et al. Stroke and bleeding in atrial fibrillation with chronic kidney disease. *N Engl J Med*. 2012 Aug 16;367(7):625–35.
15. Lamberts M, Lip GYH, Hansen ML, Lindhardsen J, Olesen JB, Raunsø J, et al. Relation of nonsteroidal anti-inflammatory drugs to serious bleeding and thromboembolism risk in patients with atrial fibrillation receiving antithrombotic therapy: a nationwide cohort study. *Ann Intern Med*. 2014 Nov 18;161(10):690–8.
16. Fosbøl EL, Gislason GH, Jacobsen S, Abildstrom SZ, Hansen ML, Schramm TK, et al. The pattern of use of non-steroidal anti-inflammatory drugs (NSAIDs) from 1997 to 2005: a nationwide study on 4.6 million people. *Pharmacoepidemiol Drug Saf*. 2008 Aug 1;17(8):822–33.
17. Gundlund A, Kümler T, Olesen JB, Bonde AN, Gislason GH, Torp-Pedersen C, et al. Comparative thromboembolic risk in atrial fibrillation patients with and without a concurrent

- 1  
2  
3  
4 1 infection. *Am Heart J.* 2018 Jul 10;204:43–51.
- 5 2 18. Walkey AJ, Hammill BG, Curtis LH, Benjamin EJ. Long-term outcomes following  
6 3 development of new-onset atrial fibrillation during sepsis. *Chest.* 2014 Nov;146(5):1187–95.
- 7 4 19. Adderley NJ, Nirantharakumar K, Marshall T. Risk of stroke and transient ischaemic  
8 5 attack in patients with a diagnosis of resolved atrial fibrillation: retrospective cohort studies. *BMJ.*  
9 6 2018 May 9;361:k1717.
- 10 7 20. Lubitz SA, Yin X, Rienstra M, Schnabel RB, Walkey AJ, Magnani JW, et al. Long-  
11 8 term outcomes of secondary atrial fibrillation in the community: the Framingham Heart Study.  
12 9 *Circulation.* 2015 May 12;131(19):1648–55.
- 13 10 21. Fauchier L, Clementy N, Bisson A, Stamboul K, Ivanov F, Angoulvant D, et al.  
14 11 Prognosis in patients with atrial fibrillation and a presumed ‘temporary cause’ in a community-  
15 12 based cohort study. *Clin Res Cardiol Off J Ger Card Soc.* 2017 Mar;106(3):202–10.
- 16 13 22. Quon MJ, Behloul H, Pilote L. Anticoagulant Use and Risk of Ischemic Stroke and  
17 14 Bleeding in Patients With Secondary Atrial Fibrillation Associated With Acute Coronary  
18 15 Syndromes, Acute Pulmonary Disease, or Sepsis. *JACC Clin Electrophysiol.* 2017 Sep 27;500.
- 19 16 23. Gadsbøll K, Staerk L, Fosbøl EL, Sindet-Pedersen C, Gundlund A, Lip GYH, et al.  
20 17 Increased use of oral anticoagulants in patients with atrial fibrillation: temporal trends from 2005 to  
21 18 2015 in Denmark. *Eur Heart J.* 2017 Jan 21;
- 22 19 24. Gundlund A, Xian Y, Peterson ED, Butt JH, Gadsbøll K, Olesen JB, et al. Prestroke  
23 20 and Poststroke Antithrombotic Therapy in Patients With Atrial Fibrillation: Results From a  
24 21 Nationwide Cohort. *JAMA Netw Open.* 2018 May 18;1(1):e180171–e180171.
- 25 22 25. Roth JA, Bradley K, Thummel KE, Veenstra DL, Boudreau D. Alcohol misuse,  
26 23 genetics, and major bleeding among warfarin therapy patients in a community setting.  
27 24 *Pharmacoepidemiol Drug Saf.* 2015 Jun;24(6):619–27.
- 28 25 26. Traube E, Coplan NL. Embolic risk in atrial fibrillation that arises from  
29 26 hyperthyroidism: review of the medical literature. *Tex Heart Inst J.* 2011;38(3):225–8.
- 30 27 27. Procter NEK, Ball J, Liu S, Hurst N, Nooney VB, Goh V, et al. Impaired platelet  
31 28 nitric oxide response in patients with new onset atrial fibrillation. *Int J Cardiol.* 2015 Jan  
32 29 20;179:160–5.
- 33 30 28. Horowitz JD, De Caterina R, Heresztyn T, Alexander JH, Andersson U, Lopes RD, et  
34 31 al. Asymmetric and Symmetric Dimethylarginine Predict Outcomes in Patients With Atrial  
35 32 Fibrillation: An ARISTOTLE Substudy. *J Am Coll Cardiol.* 2018 Aug 14;72(7):721–33.
- 36  
37  
38  
39  
40  
41  
42  
43  
44  
45  
46  
47  
48  
49  
50  
51  
52  
53  
54  
55  
56  
57  
58  
59  
60



1  
2  
3  
4 **1 Figure legends**

5  
6 **2 Figure 1: Patient selection**

7  
8  
9 **3 Figure 2: Number of events, incidence rates, and crude and adjusted Hazard ratios of long-term**  
10  
11 **4 outcomes in patients with AF with and without a secondary precipitant.**

12  
13 **5 Figure 3: Cumulative incidence of thromboembolic events outcomes by secondary precipitant and**  
14  
15 **6 OAC therapy at the index date.**

16  
17  
18 **7 Figure 4: Cumulative incidence of death events outcomes by secondary precipitant and OAC**  
19  
20 **8 therapy at the index date.**

21  
22  
23 **9 Figure 5: Adjusted hazard ratios of long-term outcomes in patients with AF initiated vs. not**  
24  
25 **10 initiated on OAC therapy (stratified according to type of AF).**

**Table 1: Baseline characteristics of the matched population**

|                                                      | Alcohol intoxication group |            | Thyrotoxicosis group |             | Myocardial infarction group |             | Surgery group |             | Infection group |               | >1 precipitant group |             |
|------------------------------------------------------|----------------------------|------------|----------------------|-------------|-----------------------------|-------------|---------------|-------------|-----------------|---------------|----------------------|-------------|
| +/- secondary precipitant:                           | +                          | -          | +                    | -           | +                           | -           | +             | -           | +               | -             | +                    | -           |
|                                                      | N=335                      | N=335      | N=2507               | N=2507      | N=4773                      | N=4773      | N=5229        | N=5229      | N=21,824        | N=21,824      | N=5055               | N=5055      |
| <b>Demographics</b>                                  |                            |            |                      |             |                             |             |               |             |                 |               |                      |             |
| Age, median (IQR*)                                   | 59 (49-66)                 | 59 (49-66) | 73 (63-81)           | 73 (63-81)  | 77 (69-83)                  | 77 (69-83)  | 75 (67-82)    | 75 (67-82)  | 79 (71-86)      | 79 (71-86)    | 76 (68-83)           | 76 (68-83)  |
| Male, n (%)                                          | 276 (82.4)                 | 276 (82.4) | 521 (20.8)           | 521 (20.8)  | 2705 (56.7)                 | 2705 (56.7) | 2724 (52.1)   | 2724 (52.1) | 10,370 (47.5)   | 10,370 (47.5) | 2676 (52.9)          | 2676 (52.9) |
| <b>Comorbidities, n (%)</b>                          |                            |            |                      |             |                             |             |               |             |                 |               |                      |             |
| Cancer                                               | 16 (4.8)                   | 29 (8.7)   | 288 (11.5)           | 296 (11.8)  | 586 (12.3)                  | 688 (14.4)  | 1349 (25.8)   | 882 (16.9)  | 4341 (19.9)     | 3571 (16.4)   | 958 (19.0)           | 807 (16.0)  |
| Chronic kidney disease                               | 11 (3.3)                   | 8 (2.4)    | 61 (2.4)             | 49 (2.0)    | 289 (6.1)                   | 233 (4.7)   | 352 (6.7)     | 198 (3.8)   | 1564 (7.2)      | 748 (3.4)     | 431 (8.5)            | 212 (4.2)   |
| COPD†                                                | 28 (8.4)                   | 23 (6.9)   | 234 (9.3)            | 221 (8.8)   | 619 (13.0)                  | 565 (11.8)  | 665 (12.7)    | 520 (9.9)   | 4696 (21.5)     | 2093 (9.6)    | 914 (18.1)           | 519 (10.3)  |
| Diabetes                                             | 26 (7.8)                   | 18 (5.4)   | 189 (7.5)            | 159 (6.3)   | 575 (12.0)                  | 556 (11.6)  | 503 (9.6)     | 423 (8.1)   | 2167 (9.9)      | 1737 (8.0)    | 498 (9.9)            | 554 (11.0)  |
| Heart failure                                        | 24 (7.2)                   | 18 (5.4)   | 445 (17.8)           | 388 (15.5)  | 1660 (34.8)                 | 1076 (22.5) | 966 (18.5)    | 851 (16.3)  | 5109 (23.4)     | 3709 (17.0)   | 1574 (31.1)          | 925 (18.3)  |
| Hypertension                                         | 64 (19.1)                  | 78 (23.3)  | 1309 (52.2)          | 1249 (49.8) | 3290 (68.9)                 | 3204 (67.1) | 2484 (47.5)   | 2695 (51.5) | 10,445 (47.9)   | 11,475 (52.6) | 2694 (53.3)          | 3007 (59.5) |
| IHD‡                                                 | 43 (12.8)                  | 53 (15.8)  | 333 (13.3)           | 455 (18.1)  | 4773 (100)                  | 1604 (33.6) | 1753 (33.5)   | 1332 (25.5) | 4696 (21.5)     | 5069 (23.2)   | 3072 (60.8)          | 1423 (28.2) |
| PAD§                                                 | 7 (2.1)                    | 8 (2.4)    | 78 (3.1)             | 83 (3.3)    | 375 (7.9)                   | 293 (6.1)   | 468 (9.0)     | 233 (4.5)   | 1392 (6.4)      | 932 (4.3)     | 448 (8.9)            | 269 (5.3)   |
| Prior bleeding event                                 | 81 (24.2)                  | 42 (12.5)  | 243 (9.7)            | 249 (9.9)   | 722 (15.1)                  | 715 (15.0)  | 1267 (24.2)   | 833 (15.9)  | 4319 (19.8)     | 3463 (15.9)   | 1171 (23.2)          | 811 (16.0)  |
| Prior thromboembolic event                           | 24 (7.2)                   | 24 (7.2)   | 138 (5.5)            | 183 (7.3)   | 483 (10.1)                  | 698 (14.6)  | 571 (10.9)    | 570 (10.9)  | 2651 (12.1)     | 2278 (10.4)   | 603 (11.9)           | 635 (12.6)  |
| <b>Risk scores</b>                                   |                            |            |                      |             |                             |             |               |             |                 |               |                      |             |
| CHA <sub>2</sub> DS <sub>2</sub> -VASC <sup>  </sup> |                            |            |                      |             |                             |             |               |             |                 |               |                      |             |
| Median (IQR*)                                        | 1 (0-2)                    | 1 (0-2)    | 3 (2-4)              | 3 (2-4)     | 4 (3-5)                     | 3 (3-4)     | 3 (2-4)       | 3 (2-4)     | 3 (2-4)         | 3 (2-4)       | 4 (2-5)              | 3 (2.4)     |
| 0                                                    | 158 (47.2)                 | 158 (47.2) | 405 (16.2)           | 405 (16.2)  | 0                           | 0           | 391 (7.5)     | 391 (7.5)   | 1328 (6.1)      | 1328 (6.1)    | 269 (5.3)            | 269 (5.3)   |
| 1-2                                                  | 118 (35.2)                 | 118 (35.2) | 530 (3.0)            | 530 (3.0)   | 670 (14.0)                  | 670 (14.0)  | 1406 (26.9)   | 1406 (26.9) | 5148 (23.6)     | 5148 (23.6)   | 1005 (19.9)          | 1005 (19.9) |
| ≥3                                                   | 59 (17.6)                  | 59 (17.6)  | 1572 (62.7)          | 1572 (62.7) | 4103 (86.0)                 | 4103 (86.0) | 3432 (65.6)   | 3432 (65.6) | 15,348 (70.3)   | 15,348 (70.3) | 3781 (74.8)          | 3781 (74.8) |
| HAS-BLED <sup>#</sup>                                |                            |            |                      |             |                             |             |               |             |                 |               |                      |             |
| Median (IQR*)                                        | 2 (1-3)                    | 1 (0-2)    | 2 (1-3)              | 2 (1-3)     | 3 (2-3)                     | 2 (2-3)     | 2 (1-3)       | 2 (1-3)     | 2 (1-3)         | 2 (1-3)       | 2 (2-3)              | 2 (2-3)     |
| 0                                                    | 0                          | 0          | 355 (14.2)           | 331 (13.2)  | 134 (2.8)                   | 76 (1.6)    | 289 (5.5)     | 381 (7.3)   | 1003 (4.6)      | 1147 (5.2)    | 208 (4.1)            | 242 (4.8)   |
| 1-2                                                  | 232 (69.3)                 | 155 (46.3) | 1460 (58.2)          | 1440 (57.4) | 2552 (53.5)                 | 2863 (54.8) | 2863 (54.8)   | 2935 (56.1) | 12,130 (55.6)   | 12,129 (55.6) | 2422 (47.9)          | 2638 (52.2) |
| ≥3                                                   | 103 (30.8)                 | 52 (15.5)  | 692 (27.6)           | 736 (29.4)  | 2145 (6.7)                  | 2077 (6.5)  | 2077 (39.7)   | 1913 (36.6) | 8691 (39.8)     | 8548 (39.2)   | 2425 (48.0)          | 2175 (43.0) |
| <b>Pharmacotherapy, n (%)</b>                        |                            |            |                      |             |                             |             |               |             |                 |               |                      |             |
| OAC <sup>**</sup> therapy, n (%)                     | 33 (9.9)                   | 33 (9.9)   | 1100 (43.9)          | 1100 (43.9) | 1311 (27.5)                 | 1311 (27.5) | 1150 (22.0)   | 1150 (22.0) | 5985 (27.4)     | 5985 (27.4)   | 1087 (21.5)          | 1087 (21.5) |
| Amiodarone                                           | ≤3                         | 6 (1.8)    | 33 (1.3)             | 62 (2.5)    | 359 (7.5)                   | 158 (3.3)   | 443 (8.5)     | 163 (3.1)   | 617 (2.8)       | 574 (2.6)     | 418 (8.3)            | 154 (3.0)   |

|   |                                                                                                                                                                                                                     |           |          |             |            |             |             |             |             |             |             |             |             |
|---|---------------------------------------------------------------------------------------------------------------------------------------------------------------------------------------------------------------------|-----------|----------|-------------|------------|-------------|-------------|-------------|-------------|-------------|-------------|-------------|-------------|
| 1 |                                                                                                                                                                                                                     |           |          |             |            |             |             |             |             |             |             |             |             |
| 2 | Digoxin                                                                                                                                                                                                             | 49 (14.6) | 29 (8.7) | 1000 (39.9) | 916 (36.5) | 1207 (25.3) | 1502 (31.5) | 1089 (20.8) | 1285 (24.6) | 7973 (36.5) | 6286 (28.8) | 1184 (23.4) | 1223 (24.2) |
| 3 | Flecainide                                                                                                                                                                                                          | 0 (0)     | ≤ 3      | 13 (0.5)    | 29 (1.2)   | 9 (0.2)     | 32 (0.7)    | 12 (0.2)    | 52 (1.0)    | 40 (0.2)    | 156 (0.7)   | 6 (0.1)     | 27 (0.5)    |
| 4 | *IQR: interquartile range. †COPD: chronic obstructive pulmonary disease. ‡IHD: ischemic heart disease. §PAD: peripheral artery disease.   CHA <sub>2</sub> DS <sub>2</sub> -VASc: Risk score for stroke: congestive |           |          |             |            |             |             |             |             |             |             |             |             |
| 5 | heart failure/LV function, hypertension, age 65-74 years, age>74 years (2 points), diabetes, stroke/TIA/systemic embolism (2 points), vascular disease, sex category (female); #HAS-BLED: Risk                      |           |          |             |            |             |             |             |             |             |             |             |             |
| 6 | score for bleeding: hypertension, abnormal renal/liver function, history of stroke, history of bleeding, INR (left out due to missing data), age>65 years, drug consumption with antiplatelet                       |           |          |             |            |             |             |             |             |             |             |             |             |
| 7 | agents/non-steroidal inflammatory drugs, alcohol abuse. **OAC: oral anticoagulation.                                                                                                                                |           |          |             |            |             |             |             |             |             |             |             |             |
| 8 |                                                                                                                                                                                                                     |           |          |             |            |             |             |             |             |             |             |             |             |

For peer review only

1  
2  
3  
4  
5  
6  
7  
8  
9  
10  
11  
12  
13  
14  
15  
16  
17  
18  
19  
20  
21  
22  
23  
24  
25  
26  
27  
28  
29  
30  
31  
32  
33  
34  
35  
36  
37  
38  
39  
40  
41  
42  
43  
44  
45  
46

For peer review only

AF for the first time with a secondary precipitant, 1996-2015  
N=66,242

AF for the first time without a secondary precipitant, 1996-2015  
N=138,618

**Exclusions (N=26,166)**

- <18 years or > 100 years, N=134
- Valvular atrial fibrillation, N=2038
- Atrial fibrillation therapy before hospital admission, N=13,916
- Dead or emigrated during the blanking period, N=7366
- Thromboembolic event during the blanking period, N=2712

**Exclusions (N=40,430)**

- <18 years or > 100 years, N=278
- Valvular atrial fibrillation, N=2550
- Atrial fibrillation therapy before hospital admission, N=33,629
- Dead or emigrated during the blanking period, N=1992
- Thromboembolic event during the blanking period, N=1981

**Complete study population**

AF with secondary precipitant  
N=40,076

AF without secondary precipitant  
N=98,188

**Matched population**

- 39,723 patients with AF with secondary precipitant
  - 335 (0.8%) with alcohol intoxication
  - 2507 (6.3%) with thyrotoxicosis
  - 4773 (12.0%) with myocardial infarction
  - 5229 (13.2%) had had surgery
  - 21,824 (55.0%) with infection
  - 5055 (12.7%) with >1 precipitant
- 39,723 patients with AF without a secondary precipitant

1  
2  
3  
4  
5  
6  
7  
8  
9  
10  
11  
12  
13  
14  
15  
16  
17  
18  
19  
20  
21  
22  
23  
24  
25  
26  
27  
28  
29  
30  
31  
32  
33  
34  
35  
36  
37  
38  
39  
40  
41



112x90mm (300 x 300 DPI)



160x94mm (300 x 300 DPI)

1  
2  
3  
4  
5  
6  
7  
8  
9  
10  
11  
12  
13  
14  
15  
16  
17  
18  
19  
20  
21  
22  
23  
24  
25  
26  
27  
28  
29  
30  
31  
32  
33  
34  
35  
36  
37  
38  
39  
40  
41  
42  
43  
44  
45  
46  
47  
48  
49  
50  
51  
52  
53  
54  
55  
56  
57  
58  
59  
60



160x94mm (300 x 300 DPI)



1  
2  
3  
4  
5  
6  
7  
8  
9  
10  
11  
12  
13  
14  
15  
16  
17  
18  
19  
20  
21  
22  
23  
24  
25  
26  
27  
28  
29  
30  
31  
32  
33  
34  
35  
36  
37  
38  
39  
40  
41  
42  
43  
44  
45  
46  
47  
48  
49  
50  
51  
52  
53  
54  
55  
56  
57  
58  
59  
60



134x90mm (300 x 300 DPI)

## Supplemental material

### Comparative thromboembolic risk in atrial fibrillation with and without a secondary precipitant – a Danish nationwide cohort study

Anna Gundlund, MD, PhD; Thomas Kümler, MD, PhD; Anders N. Bonde, MD; Jawad H. Butt, MD; Gunnar H. Gislason, MD, PhD; Christian Torp-Pedersen, MD, DMSc; Lars Køber, MD, DMSc; Jonas B. Olesen, MD, PhD; Emil L. Fosbøl, MD, PhD

Online Table 1: Specification of diagnoses by international classification of diseases (ICD-8 and ICD-10) codes and pharmacotherapy by anatomical therapeutic chemical classification (ATC) codes.

Online Table 2: Baseline characteristics of the non-matched population, patients initiated on OAC therapy

Online Table 3: Baseline characteristics of the non-matched population, patients not initiated on OAC therapy

Online Figure 1: Adjusted Hazard ratios of long-term outcomes in patients with AF with and without a secondary precipitant. Adjustments: age groups, peripheral artery disease, heart failure, hypertension, prior thromboembolic event, ischemic heart disease, chronic kidney disease, diabetes, prior bleeding event, cancer, antiarrhythmic therapy (amiodarone, digoxin, flecainide) at the index date and OAC therapy status as a time-dependent variable.

**Online Table 1: Specification of diagnoses by international classification of diseases (ICD-8 and ICD-10) codes and pharmacotherapy by anatomical therapeutic chemical classification (ATC) codes.**

| <b>Precipitants</b>                    | <b>ICD-10 codes and NCSP, NOMESCO Classification of Surgical Procedures</b>                                                                                                                                                                                                                                                                                                                                                                                                                                                                                                                                           |
|----------------------------------------|-----------------------------------------------------------------------------------------------------------------------------------------------------------------------------------------------------------------------------------------------------------------------------------------------------------------------------------------------------------------------------------------------------------------------------------------------------------------------------------------------------------------------------------------------------------------------------------------------------------------------|
| Alcohol intoxication                   | ICD-10: F100, F103, F104, R780, T51, X65                                                                                                                                                                                                                                                                                                                                                                                                                                                                                                                                                                              |
| Infections                             | ICD-10:<br>Certain infectious and parasitic diseases: A00-B99.<br>Infections in the eye and adnexa: H00, H01, H10, H20, H30, H44, H60, H65-H68, H70, H73.0, H73.1<br>Infections in the cardiovascular organs: I30, I32, I33, I38-I41<br>Infections in pulmonary system: J00-J22, J32, J36, J85, J86<br>Infections in the gastrointestinal system: K12, K20, K35-K37, K57, K65, K67, K81, K85<br>Infections in the skin, subcutaneous tissue, bones, muscles, and connective tissue: L00-L08, M00, M01, M60, M63.2, M65, M86, M90.0, M90.1, M90.2<br>Infections in the urogenital system: N00, N01, N05, N30, N70-N77. |
| Myocardial infarction                  | ICD-10: I21                                                                                                                                                                                                                                                                                                                                                                                                                                                                                                                                                                                                           |
| Pulmonary embolism                     | ICD-10: I260, I269, O882D, O882E, T817D                                                                                                                                                                                                                                                                                                                                                                                                                                                                                                                                                                               |
| Surgery                                | NCSP, NOMESCO Classification of Surgical Procedures: KF, KM, KN, KD, KPH, KPJ, KJ, KH, KQ, KB, KC, KL, KE, KA, KG, KK.                                                                                                                                                                                                                                                                                                                                                                                                                                                                                                |
| Thyrotoxicosis                         | ICD-10: E05                                                                                                                                                                                                                                                                                                                                                                                                                                                                                                                                                                                                           |
| <b>Outcomes</b>                        |                                                                                                                                                                                                                                                                                                                                                                                                                                                                                                                                                                                                                       |
| Atrial fibrillation re-hospitalization | Hospital admission with primary diagnosis of atrial fibrillation: I48                                                                                                                                                                                                                                                                                                                                                                                                                                                                                                                                                 |
| Thromboembolic event                   | Ischemic stroke: I63, I64<br>Death from stroke: I61-I64<br>Transient ischemic attack: G458, G459<br>Thrombosis or embolism in arteries: I74                                                                                                                                                                                                                                                                                                                                                                                                                                                                           |
| <b>Comorbidities</b>                   | <b>ICD-8 and ICD-10 codes</b>                                                                                                                                                                                                                                                                                                                                                                                                                                                                                                                                                                                         |

|    |                                       |                                                |
|----|---------------------------------------|------------------------------------------------|
| 1  |                                       |                                                |
| 2  |                                       |                                                |
| 3  |                                       |                                                |
| 4  | Atrial fibrillation                   | ICD-10: I48                                    |
| 5  |                                       | ICD-8: 42793, 42794                            |
| 6  |                                       |                                                |
| 7  | Alcohol abuse                         | ICD-10: E24.4, E52, F10, G31.2, G62.1, G72.1,  |
| 8  |                                       | I42.6, K29.2, K70, K86.0, L27.8A, O35.4, T51,  |
| 9  |                                       | Z71.4, Z72.1.                                  |
| 10 |                                       |                                                |
| 11 |                                       | ATC: N07BB                                     |
| 12 |                                       |                                                |
| 13 | Cancer                                | ICD-10: C                                      |
| 14 |                                       |                                                |
| 15 | Chronic kidney disease                | ICD-10: E10.2, E11.2, E13.2, E14.2, I12.0,     |
| 16 |                                       | M32.1B, N02-N08, N11, N12, N14, N15.8,         |
| 17 |                                       | N15.9, N16.0, N16.2-N16.4, N16.8, N18, N19,    |
| 18 |                                       | N26, Q61                                       |
| 19 | Chronic obstructive pulmonary disease | ICD-10: J42, J43, J44                          |
| 20 | Diabetes                              | ATC: A10 (3 months before index)               |
| 21 | Heart failure                         | ICD-10: I11.0, I42, I50, J81                   |
| 22 |                                       |                                                |
| 23 |                                       |                                                |
| 24 | Hypertension                          | Usage of a combination of at least two of the  |
| 25 |                                       | seven different drug classes at the same time: |
| 26 |                                       |                                                |
| 27 |                                       | 1. Non-loop diuretics                          |
| 28 |                                       | 2. Loop diuretics                              |
| 29 |                                       | 3. Antiadrenergic agents                       |
| 30 |                                       | 4. Beta-blockers                               |
| 31 |                                       | 5. Vasodilators                                |
| 32 |                                       | 6. Calcium channel blockers                    |
| 33 |                                       | 7. Renin-angiotensin system inhibitors         |
| 34 |                                       |                                                |
| 35 |                                       |                                                |
| 36 | Ischemic heart disease                | ICD-10: I20-I25                                |
| 37 | Peripheral artery disease             | ICD-10: I70                                    |
| 38 | Prior bleeding                        | ICD-10: D50.0, D62, G951A, H31.3, H05.2A,      |
| 39 |                                       | H35.6, H43.1, H45.0, I31.2, I60-I62, I85.0,    |
| 40 |                                       | I86.4A, J94.2, K22.8F, K25.0, K25.2, K25.4,    |
| 41 |                                       | K25.6, K26.0, K26.2, K26.4, K26.6, K27.0       |
| 42 |                                       | K27.2, K27.4, K27.6, K28.0, K28.2, K28.4,      |
| 43 |                                       | K28.6, K29.8A, K62.5, K63.8B, K63.8C, K66.1,   |
| 44 |                                       | K83.8F, K86.8G, K92.0-K92.2, N02, R04, R31,    |
| 45 |                                       | S06.4-S06.6, S36.8D                            |
| 46 |                                       |                                                |
| 47 |                                       |                                                |
| 48 |                                       |                                                |
| 49 |                                       |                                                |
| 50 |                                       |                                                |
| 51 | Thromboembolic event                  | ICD-10: G45.8, G45.9, I63, I64, I74            |
| 52 |                                       |                                                |
| 53 | Valvular atrial fibrillation          | Atrial fibrillation without:                   |
| 54 |                                       | ICD-10: I05, I06, I080A, I081A, I082A, I083A,  |
| 55 |                                       | Z952, Z954                                     |
| 56 |                                       | ICD-8: 39500-39502, 39508, 39509, 39600-       |
| 57 |                                       | 39604, 39608, 39609                            |
| 58 |                                       | Procedures: FKD, FKH, FMD, FMH, FGE, FJE       |
| 59 | <b>Pharmacotherapy</b>                | <b>ACT-codes</b>                               |
| 60 |                                       |                                                |

1  
2  
3  
4  
5  
6  
7  
8  
9  
10  
11  
12  
13  
14  
15  
16  
17  
18  
19  
20  
21  
22  
23  
24  
25  
26  
27  
28  
29  
30  
31  
32  
33  
34  
35  
36  
37  
38  
39  
40  
41  
42  
43  
44  
45  
46  
47  
48  
49  
50  
51  
52  
53  
54  
55  
56  
57  
58  
59  
60

|                                     |                                                                                                                       |
|-------------------------------------|-----------------------------------------------------------------------------------------------------------------------|
| ADP-receptor blockers               | B01AC04, B01AC22, B01AC24                                                                                             |
| Amiodarone                          | C01BD01                                                                                                               |
| Antiadrenergic agents               | C02A, C02B, C02C                                                                                                      |
| Oral anticoagulation therapy        | Vitamin K antagonists: B01AA03, B01AA04<br>Non-vitamin K antagonist oral anticoagulants:<br>B01AF01, B01AF02, B01AE07 |
| Beta-blockers                       | C07A, C07B, C07C, C07D, C07F                                                                                          |
| Calcium channel blockers            | C08, C09BB, C09DB                                                                                                     |
| Digoxin                             | C01AA                                                                                                                 |
| Flecainide                          | C01BC                                                                                                                 |
| Loop diuretics                      | C03C, C03EB                                                                                                           |
| Non-loop diuretics                  | C02DA, C03EA, C03EB, C02L, C03A, C03B,<br>C03D, C03E, C03X, C07B, C07C, C07D, C08G,<br>C09BA, C09DA, C09XA52          |
| Renin-angiotensin system inhibitors | C09AA, C09BA, C09BB, C09CA, C09DA,<br>C09DB, C09XA02, C09XA52                                                         |
| Vasodilators                        | C02DB, C02DD, C02DG                                                                                                   |

**Online Table 2: Baseline characteristics of the non-matched population, patients initiated on OAC therapy**

|                                                      | AF with a secondary precipitant<br>N=10,673 |                               |                                    |                   |                     |                          | AF without a<br>secondary<br>precipitant<br>N=37,827 |
|------------------------------------------------------|---------------------------------------------|-------------------------------|------------------------------------|-------------------|---------------------|--------------------------|------------------------------------------------------|
|                                                      | Alcohol<br>intoxication<br>N=33             | Thyro-<br>toxicosis<br>N=1103 | Myocardial<br>infarction<br>N=1312 | Surgery<br>N=1151 | Infection<br>N=5987 | >1 precipitant<br>N=1087 |                                                      |
| <b>Demographics</b>                                  |                                             |                               |                                    |                   |                     |                          |                                                      |
| Age, median (IQR*)                                   | 64 (55-68)                                  | 72 (64-79)                    | 75 (68-81)                         | 74 (67-81)        | 77 (69-83)          | 75 (68-81)               | 72 (64-79)                                           |
| Male, n (%)                                          | 28 (84.8)                                   | 259 (23.5)                    | 842 (64.2)                         | 667 (57.9)        | 3189 (53.3)         | 634 (58.3)               | 21,386 (56.5)                                        |
| <b>Comorbidities, n (%)</b>                          |                                             |                               |                                    |                   |                     |                          |                                                      |
| Cancer                                               | ≤3                                          | 114 (10.3)                    | 146 (11.1)                         | 239 (20.8)        | 927 (15.5)          | 171 (15.1)               | 4617 (12.2)                                          |
| Chronic kidney disease                               | 4 (12.1)                                    | 23 (2.1)                      | 62 (4.7)                           | 65 (5.6)          | 372 (6.2)           | 59 (5.4)                 | 1011 (2.7)                                           |
| COPD†                                                | ≤3                                          | 106 (9.6)                     | 133 (10.1)                         | 128 (11.1)        | 1251 (20.9)         | 157 (14.4)               | 3426 (9.1)                                           |
| Diabetes                                             | ≤3                                          | 84 (7.6)                      | 159 (12.1)                         | 111 (9.6)         | 712 (11.9)          | 112 (10.3)               | 3384 (8.9)                                           |
| Heart failure                                        | 6 (18.2)                                    | 236 (21.4)                    | 464 (35.4)                         | 228 (19.8)        | 1440 (24.1)         | 359 (33.0)               | 6791 (18.0)                                          |
| Hypertension                                         | 11 (33.3)                                   | 658 (59.7)                    | 982 (74.8)                         | 687 (59.7)        | 3652 (61.0)         | 723 (66.5)               | 23,057 (61.0)                                        |
| IHD‡                                                 | 5 (15.2)                                    | 129 (11.7)                    | 1312 (100)                         | 434 (37.7)        | 1202 (20.1)         | 744 (68.4)               | 7360 (19.5)                                          |
| PAD§                                                 | ≤3                                          | 29 (2.6)                      | 83 (6.3)                           | 101 (8.8)         | 353 (5.9)           | 77 (7.1)                 | 1258 (3.3)                                           |
| Prior bleeding event                                 | 7 (21.2)                                    | 86 (7.8)                      | 150 (11.4)                         | 213 (18.5)        | 966 (16.1)          | 182 (16.7)               | 4564 (12.1)                                          |
| Prior thromboembolic event                           | ≤3                                          | 60 (5.4)                      | 142 (10.8)                         | 153 (13.3)        | 672 (11.2)          | 133 (12.2)               | 3313 (8.8)                                           |
| <b>Risk scores</b>                                   |                                             |                               |                                    |                   |                     |                          |                                                      |
| CHA <sub>2</sub> DS <sub>2</sub> -VASC <sup>  </sup> |                                             |                               |                                    |                   |                     |                          |                                                      |
| Median (IQR*)                                        | 1 (0-2)                                     | 3 (2-4)                       | 4 (3-5)                            | 3 (2-4)           | 3 (2-4)             | 4 (3-5)                  | 3 (2-4)                                              |
| 0                                                    | 11 (33.3)                                   | 134 (12.2)                    | 0                                  | 74 (6.4)          | 269 (4.5)           | 28 (2.6)                 | 3592 (9.5)                                           |
| 1-2                                                  | 16 (48.5)                                   | 263 (23.8)                    | 181 (13.8)                         | 289 (25.1)        | 1493 (24.9)         | 181 (16.6)               | 12,341 (32.6)                                        |
| ≥3                                                   | 6 (18.2)                                    | 706 (64.0)                    | 1131 (86.2)                        | 788 (68.5)        | 4225 (70.6)         | 878 (80.8)               | 21,894 (57.9)                                        |
| HAS-BLED <sup>#</sup>                                |                                             |                               |                                    |                   |                     |                          |                                                      |
| Median (IQR*)                                        | 2 (1-3)                                     | 2 (1-2)                       | 3 (2-3)                            | 2 (1-3)           | 2 (1-3)             | 2 (2-3)                  | 2 (1-3)                                              |
| 0                                                    | 0                                           | 128 (11.6)                    | 32 (2.4)                           | 60 (5.2)          | 259 (4.3)           | 33 (3.0)                 | 3361 (8.9)                                           |
| 1-2                                                  | 21 (63.6)                                   | 706 (64.0)                    | 571 (43.5)                         | 611 (53.1)        | 3433 (57.3)         | 515 (47.4)               | 22,792 (60.3)                                        |
| ≥3                                                   | 12 (36.4)                                   | 269 (24.4)                    | 709 (54.0)                         | 480 (41.7)        | 2295 (38.3)         | 539 (49.6)               | 11,674 (30.9)                                        |
| <b>Pharmacotherapy, n (%)</b>                        |                                             |                               |                                    |                   |                     |                          |                                                      |

|            |           |            |            |            |             |            |               |
|------------|-----------|------------|------------|------------|-------------|------------|---------------|
| Amiodarone | 0         | 19 (1.7)   | 104 (7.9)  | 181 (15.7) | 261 (4.4)   | 141 (13.0) | 1493 (3.9)    |
| Digoxin    | 11 (33.3) | 605 (54.9) | 437 (33.3) | 312 (27.1) | 2847 (47.6) | 368 (33.9) | 14,803 (39.1) |
| Flecainide | 0         | 5 (0.5)    | ≤3         | ≤3         | 10 (0.2)    | ≤3         | 248 (0.7)     |

\*IQR: interquartile range. †COPD: chronic obstructive pulmonary disease. ‡IHD: ischemic heart disease. §PAD: peripheral artery disease. ||CHA<sub>2</sub>DS<sub>2</sub>-VASc: Risk score for stroke: congestive heart failure/LV function, hypertension, age 65-74 years, age>74 years (2 points), diabetes, stroke/TIA/systemic embolism (2 points), vascular disease, sex category (female); #HAS-BLED: Risk score for bleeding: hypertension, abnormal renal/liver function, history of stroke, history of bleeding, INR (left out due to missing data), age>65 years, drug consumption with antiplatelet agents/non-steroidal inflammatory drugs, alcohol abuse.

For peer review only

**Online Table 3: Baseline characteristics of the non-matched population, patients not initiated on OAC therapy**

|                                                      | AF with a secondary precipitant<br>N=29,403 |                               |                                    |                   |                       |                          | AF without a<br>secondary<br>precipitant<br>N=60,361 |
|------------------------------------------------------|---------------------------------------------|-------------------------------|------------------------------------|-------------------|-----------------------|--------------------------|------------------------------------------------------|
|                                                      | Alcohol<br>intoxication<br>N=302            | Thyro-<br>toxicosis<br>N=1408 | Myocardial<br>infarction<br>N=3508 | Surgery<br>N=4101 | Infection<br>N=16,079 | >1 precipitant<br>N=4005 |                                                      |
| <b>Demographics</b>                                  |                                             |                               |                                    |                   |                       |                          |                                                      |
| Age, median (IQR*)                                   | 58 (48-66)                                  | 74 (62-82)                    | 78 (69-84)                         | 76 (67-82)        | 80 (72-87)            | 76 (68-83)               | 69 (58-80)                                           |
| Male, n (%)                                          | 248 (82.1)                                  | 263 (18.7)                    | 1907 (54.4)                        | 2069 (50.5)       | 7352 (45.7)           | 2073 (51.8)              | 31,074 (51.5)                                        |
| <b>Comorbidities, n (%)</b>                          |                                             |                               |                                    |                   |                       |                          |                                                      |
| Cancer                                               | 15 (5.0)                                    | 174 (12.4)                    | 454 (12.9)                         | 1115 (27.2)       | 3474 (21.6)           | 795 (19.9)               | 7915 (13.1)                                          |
| Chronic kidney disease                               | 7 (2.3)                                     | 38 (2.7)                      | 236 (6.7)                          | 289 (7.0)         | 1223 (7.6)            | 375 (9.4)                | 1733 (2.9)                                           |
| COPD <sup>†</sup>                                    | 26 (8.6)                                    | 128 (9.1)                     | 495 (14.1)                         | 539 (13.1)        | 3493 (21.7)           | 765 (19.1)               | 4544 (7.5)                                           |
| Diabetes                                             | 24 (7.9)                                    | 105 (7.5)                     | 417 (11.9)                         | 396 (9.7)         | 1473 (9.2)            | 387 (9.7)                | 3566 (5.9)                                           |
| Heart failure                                        | 18 (6.0)                                    | 209 (14.8)                    | 1218 (34.7)                        | 744 (18.1)        | 3752 (23.3)           | 1231 (30.7)              | 6328 (10.5)                                          |
| Hypertension                                         | 53 (17.5)                                   | 653 (46.4)                    | 2348 (66.9)                        | 1808 (44.1)       | 6942 (43.2)           | 1991 (49.7)              | 22,309 (37.0)                                        |
| IHD <sup>‡</sup>                                     | 38 (12.6)                                   | 207 (14.7)                    | 3508 (100)                         | 1326 (32.3)       | 3558 (22.1)           | 2354 (58.8)              | 11,528 (19.1)                                        |
| PAD <sup>§</sup>                                     | 6 (2.0)                                     | 49 (3.5)                      | 298 (8.5)                          | 371 (9.0)         | 1057 (6.6)            | 374 (9.3)                | 1913 (3.2)                                           |
| Prior bleeding event                                 | 74 (24.5)                                   | 157 (11.2)                    | 585 (16.7)                         | 1062 (25.9)       | 3420 (21.3)           | 998 (24.9)               | 7616 (12.6)                                          |
| Prior thromboembolic event                           | 22 (7.3)                                    | 78 (5.5)                      | 350 (10.0)                         | 422 (10.3)        | 2029 (12.6)           | 478 (11.9)               | 4301 (7.1)                                           |
| <b>Risk scores</b>                                   |                                             |                               |                                    |                   |                       |                          |                                                      |
| CHA <sub>2</sub> DS <sub>2</sub> -VASc <sup>  </sup> |                                             |                               |                                    |                   |                       |                          |                                                      |
| Median (IQR*)                                        | 1 (0-2)                                     | 3 (2-4)                       | 4 (3-5)                            | 3 (2-4)           | 3 (2-4)               | 4 (2-5)                  | 2 (0-4)                                              |
| 0                                                    | 147 (48.7)                                  | 271 (19.2)                    | 0                                  | 317 (7.7)         | 1059 (6.6)            | 241 (6.0)                | 15,957 (26.4)                                        |
| 1-2                                                  | 102 (33.8)                                  | 270 (19.2)                    | 489 (13.9)                         | 1119 (27.3)       | 3671 (22.8)           | 824 (20.6)               | 17,513 (29.0)                                        |
| ≥3                                                   | 53 (17.5)                                   | 867 (61.6)                    | 3019 (86.1)                        | 2665 (65.0)       | 11,349 (70.6)         | 2940 (73.4)              | 26,891 (44.6)                                        |
| HAS-BLED <sup>#</sup>                                |                                             |                               |                                    |                   |                       |                          |                                                      |
| Median (IQR*)                                        | 2 (1-3)                                     | 2 (1-3)                       | 3 (2-3)                            | 2 (1-3)           | 2 (1-3)               | 2 (2-3)                  | 2 (1-3)                                              |
| 0                                                    | 0                                           | 228 (16.2)                    | 102 (2.9)                          | 229 (5.6)         | 745 (4.6)             | 175 (4.4)                | 12,875 (21.3)                                        |
| 1-2                                                  | 211 (69.9)                                  | 756 (53.7)                    | 1424 (40.6)                        | 2265 (55.2)       | 8795 (54.7)           | 1924 (48.0)              | 31,914 (52.9)                                        |
| ≥3                                                   | 91 (30.1)                                   | 424 (30.1)                    | 1982 (56.5)                        | 1607 (39.2)       | 6539 (40.7)           | 1906 (47.6)              | 15,572 (25.8)                                        |



| Pharmacotherapy, n (%) |           |            |            |            |             |            |               |
|------------------------|-----------|------------|------------|------------|-------------|------------|---------------|
| Amiodarone             | ≤3        | 14 (1.0)   | 259 (7.4)  | 262 (6.4)  | 361 (2.2)   | 278 (6.9)  | 1133 (1.9)    |
| Digoxin                | 38 (12.6) | 398 (28.3) | 784 (22.3) | 782 (19.1) | 5210 (32.4) | 828 (20.7) | 10,336 (17.1) |
| Flecainide             | 0         | 8 (0.6)    | 8 (0.2)    | 10 (0.2)   | 30 (0.2)    | 5 (0.1)    | 786 (1.3)     |

\*IQR: interquartile range. †COPD: chronic obstructive pulmonary disease. ‡IHD: ischemic heart disease. §PAD: peripheral artery disease. ||CHA<sub>2</sub>DS<sub>2</sub>-VASc: Risk score for stroke: congestive heart failure/LV function, hypertension, age 65-74 years, age>74 years (2 points), diabetes, stroke/TIA/systemic embolism (2 points), vascular disease, sex category (female); #HAS-BLED: Risk score for bleeding: hypertension, abnormal renal/liver function, history of stroke, history of bleeding, INR (left out due to missing data), age>65 years, drug consumption with antiplatelet agents/non-steroidal inflammatory drugs, alcohol abuse.

For peer review only

**Online Figure 1: Adjusted Hazard ratios of long-term outcomes in patients with AF with and without a secondary precipitant.**

**Adjustments: age groups, peripheral artery disease, heart failure, hypertension, prior thromboembolic event, ischemic heart disease, chronic kidney disease, diabetes, prior bleeding event, cancer, antiarrhythmic therapy (amiodarone, digoxin, flecainide) at the index date and OAC therapy status as a time-dependent variable.**

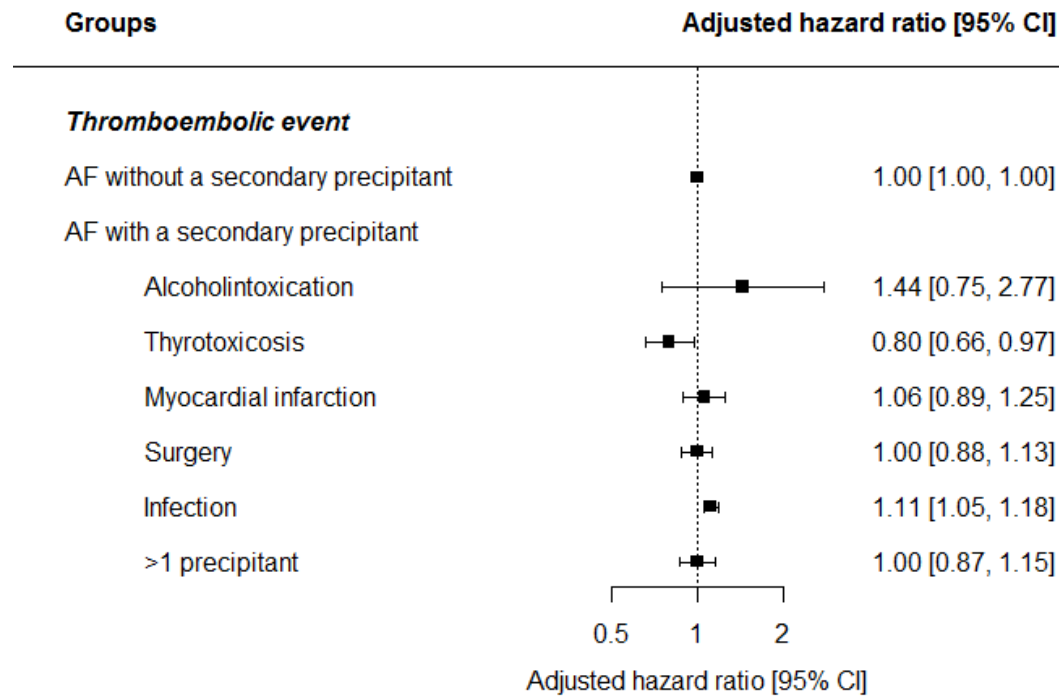

## STROBE Statement—checklist of items that should be included in reports of observational studies

|                              | Item No | Recommendation                                                                                                                                                                                                                                                                                                                                                                                                                                                                                                                                                                                                                                                                                                                     |
|------------------------------|---------|------------------------------------------------------------------------------------------------------------------------------------------------------------------------------------------------------------------------------------------------------------------------------------------------------------------------------------------------------------------------------------------------------------------------------------------------------------------------------------------------------------------------------------------------------------------------------------------------------------------------------------------------------------------------------------------------------------------------------------|
| <b>Title and abstract</b>    | 1       | (a) Indicate the study's design with a commonly used term in the title or the abstract<br>YES, p.1 and 3.<br><br>(b) Provide in the abstract an informative and balanced summary of what was done and what was found<br>YES, p. 3.                                                                                                                                                                                                                                                                                                                                                                                                                                                                                                 |
| <b>Introduction</b>          |         |                                                                                                                                                                                                                                                                                                                                                                                                                                                                                                                                                                                                                                                                                                                                    |
| Background/rationale         | 2       | Explain the scientific background and rationale for the investigation being reported<br>YES, p. 5                                                                                                                                                                                                                                                                                                                                                                                                                                                                                                                                                                                                                                  |
| Objectives                   | 3       | State specific objectives, including any prespecified hypotheses<br>YES, p. 5                                                                                                                                                                                                                                                                                                                                                                                                                                                                                                                                                                                                                                                      |
| <b>Methods</b>               |         |                                                                                                                                                                                                                                                                                                                                                                                                                                                                                                                                                                                                                                                                                                                                    |
| Study design                 | 4       | Present key elements of study design early in the paper<br>YES, p. 5-7.                                                                                                                                                                                                                                                                                                                                                                                                                                                                                                                                                                                                                                                            |
| Setting                      | 5       | Describe the setting, locations, and relevant dates, including periods of recruitment, exposure, follow-up, and data collection<br>YES, p. 5-7.                                                                                                                                                                                                                                                                                                                                                                                                                                                                                                                                                                                    |
| Participants                 | 6       | (a) <i>Cohort study</i> —Give the eligibility criteria, and the sources and methods of selection of participants. Describe methods of follow-up<br>YES, p. 6-7.<br><i>Case-control study</i> —Give the eligibility criteria, and the sources and methods of case ascertainment and control selection. Give the rationale for the choice of cases and controls<br><i>Cross-sectional study</i> —Give the eligibility criteria, and the sources and methods of selection of participants<br><br>(b) <i>Cohort study</i> —For matched studies, give matching criteria and number of exposed and unexposed<br>YES, p. 8.<br><i>Case-control study</i> —For matched studies, give matching criteria and the number of controls per case |
| Variables                    | 7       | Clearly define all outcomes, exposures, predictors, potential confounders, and effect modifiers. Give diagnostic criteria, if applicable<br>YES, p. 7-8. Figure 3. Specification of diagnosis can be found in the Online Table 1.                                                                                                                                                                                                                                                                                                                                                                                                                                                                                                  |
| Data sources/<br>measurement | 8*      | For each variable of interest, give sources of data and details of methods of assessment (measurement). Describe comparability of assessment methods if there is more than one group<br>YES, p. 5-6 and eTable 1.                                                                                                                                                                                                                                                                                                                                                                                                                                                                                                                  |
| Bias                         | 9       | Describe any efforts to address potential sources of bias<br>YES, p. 8.                                                                                                                                                                                                                                                                                                                                                                                                                                                                                                                                                                                                                                                            |
| Study size                   | 10      | Explain how the study size was arrived at<br>YES, p. 6-7, figure 1.                                                                                                                                                                                                                                                                                                                                                                                                                                                                                                                                                                                                                                                                |
| Quantitative variables       | 11      | Explain how quantitative variables were handled in the analyses. If applicable, describe which groupings were chosen and why                                                                                                                                                                                                                                                                                                                                                                                                                                                                                                                                                                                                       |

1  
2  
3  
4  
5  
6  
7  
8  
9  
10  
11  
12  
13  
14  
15  
16  
17  
18  
19  
20  
21  
22  
23  
24  
25  
26  
27  
28  
29  
30  
31  
32  
33  
34  
35  
36  
37  
38  
39  
40  
41  
42  
43  
44  
45  
46  
47  
48  
49  
50  
51  
52  
53  
54  
55  
56  
57  
58  
59  
60

YES, p. 6-7.

Statistical methods

12

(a) Describe all statistical methods, including those used to control for confounding

YES, p. 7-8.

(b) Describe any methods used to examine subgroups and interactions

YES, p. 7-8.

(c) Explain how missing data were addressed

No missing data

(d) *Cohort study*—If applicable, explain how loss to follow-up was addressed

No loss to follow-up.

*Case-control study*—If applicable, explain how matching of cases and controls was addressed

*Cross-sectional study*—If applicable, describe analytical methods taking account of sampling strategy

(e) Describe any sensitivity analyses

YES, p. 7.

Continued on next page

1  
2  
3  
4  
5  
6  
7  
8  
9  
10  
11  
12  
13  
14  
15  
16  
17  
18  
19  
20  
21  
22  
23  
24  
25  
26  
27  
28  
29  
30  
31  
32  
33  
34  
35  
36  
37  
38  
39  
40  
41  
42  
43  
44  
45  
46  
47  
48  
49  
50  
51  
52  
53  
54  
55  
56  
57  
58  
59  
60

## Results

|                          |     |                                                                                                                                                                                                                                |
|--------------------------|-----|--------------------------------------------------------------------------------------------------------------------------------------------------------------------------------------------------------------------------------|
| Participants             | 13* | (a) Report numbers of individuals at each stage of study—eg numbers potentially eligible, examined for eligibility, confirmed eligible, included in the study, completing follow-up, and analysed<br>YES, p. 8-9 and Figure 1. |
|                          |     | (b) Give reasons for non-participation at each stage<br>YES, p. 8-9 and Figure 1.                                                                                                                                              |
|                          |     | (c) Consider use of a flow diagram<br>YES, Figure 1                                                                                                                                                                            |
| Descriptive data         | 14* | (a) Give characteristics of study participants (eg demographic, clinical, social) and information on exposures and potential confounders<br>YES, p. 9, Table 1.                                                                |
|                          |     | (b) Indicate number of participants with missing data for each variable of interest<br>No missing data                                                                                                                         |
|                          |     | (c) <i>Cohort study</i> —Summarise follow-up time (eg, average and total amount)<br>YES, Figure 2.                                                                                                                             |
| Outcome data             | 15* | <i>Cohort study</i> —Report numbers of outcome events or summary measures over time<br>YES, p. 10 and Figure 2, 3.                                                                                                             |
|                          |     | <i>Case-control study</i> —Report numbers in each exposure category, or summary measures of exposure                                                                                                                           |
|                          |     | <i>Cross-sectional study</i> —Report numbers of outcome events or summary measures                                                                                                                                             |
| Main results             | 16  | (a) Give unadjusted estimates and, if applicable, confounder-adjusted estimates and their precision (eg, 95% confidence interval). Make clear which confounders were adjusted for and why they were included<br>YES, Figure 3. |
|                          |     | (b) Report category boundaries when continuous variables were categorized<br>Continuous variables were not categorized.                                                                                                        |
|                          |     | (c) If relevant, consider translating estimates of relative risk into absolute risk for a meaningful time period                                                                                                               |
| Other analyses           | 17  | Report other analyses done—eg analyses of subgroups and interactions, and sensitivity analyses<br>YES, p. 11.                                                                                                                  |
| <b>Discussion</b>        |     |                                                                                                                                                                                                                                |
| Key results              | 18  | Summarise key results with reference to study objectives<br>YES, p. 11.                                                                                                                                                        |
| Limitations              | 19  | Discuss limitations of the study, taking into account sources of potential bias or imprecision. Discuss both direction and magnitude of any potential bias<br>YES, p. 13-14.                                                   |
| Interpretation           | 20  | Give a cautious overall interpretation of results considering objectives, limitations, multiplicity of analyses, results from similar studies, and other relevant evidence<br>YES, p. 12-13.                                   |
| Generalisability         | 21  | Discuss the generalisability (external validity) of the study results<br>YES, p. 14.                                                                                                                                           |
| <b>Other information</b> |     |                                                                                                                                                                                                                                |
| Funding                  | 22  | Give the source of funding and the role of the funders for the present study and, if applicable, for the original study on which the present article is based                                                                  |

1  
2 YES, p. 14.  
3

4 \*Give information separately for cases and controls in case-control studies and, if applicable, for exposed and  
5 unexposed groups in cohort and cross-sectional studies.  
6  
7

8 **Note:** An Explanation and Elaboration article discusses each checklist item and gives methodological background and  
9 published examples of transparent reporting. The STROBE checklist is best used in conjunction with this article (freely  
10 available on the Web sites of PLoS Medicine at <http://www.plosmedicine.org/>, Annals of Internal Medicine at  
11 <http://www.annals.org/>, and Epidemiology at <http://www.epidem.com/>). Information on the STROBE Initiative is  
12 available at [www.strobe-statement.org](http://www.strobe-statement.org).  
13  
14  
15  
16  
17  
18  
19  
20  
21  
22  
23  
24  
25  
26  
27  
28  
29  
30  
31  
32  
33  
34  
35  
36  
37  
38  
39  
40  
41  
42  
43  
44  
45  
46  
47  
48  
49  
50  
51  
52  
53  
54  
55  
56  
57  
58  
59  
60

# BMJ Open

## Comparative thromboembolic risk in atrial fibrillation with and without a secondary precipitant– a Danish nationwide cohort study

|                                 |                                                                                                                                                                                                                                                                                                                                                                                                                                                                                                                                                                                                                                                 |
|---------------------------------|-------------------------------------------------------------------------------------------------------------------------------------------------------------------------------------------------------------------------------------------------------------------------------------------------------------------------------------------------------------------------------------------------------------------------------------------------------------------------------------------------------------------------------------------------------------------------------------------------------------------------------------------------|
| Journal:                        | <i>BMJ Open</i>                                                                                                                                                                                                                                                                                                                                                                                                                                                                                                                                                                                                                                 |
| Manuscript ID                   | bmjopen-2018-028468.R3                                                                                                                                                                                                                                                                                                                                                                                                                                                                                                                                                                                                                          |
| Article Type:                   | Original research                                                                                                                                                                                                                                                                                                                                                                                                                                                                                                                                                                                                                               |
| Date Submitted by the Author:   | 26-Aug-2019                                                                                                                                                                                                                                                                                                                                                                                                                                                                                                                                                                                                                                     |
| Complete List of Authors:       | Gundlund, A; Herlev and Gentofte Hospital, K umlner, Thomas; Herlev and Gentofte Hospital<br>Bonde, Anders; Herlev and Gentofte Hospital<br>Butt, Jawad; Rigshospitalet, Department of Cardiology<br>Gislason, Gunnar; Herlev and Gentofte Hospital<br>Torp-Pedersen, Christian; Aalborg University, Department of Health Science and Technology; Aalborg University Hospital , Department of Clinical Epidemiology<br>K ober, Lars; Rigshospitalet, Department of Cardiology - The Heart Centre<br>Olesen, Jonas; Copenhagen University Hospital Gentofte, Department of Cardiology<br>Fosb øl, Emil; Rigshospitalet, Department of Cardiology |
| <b>Primary Subject Heading</b>: | Cardiovascular medicine                                                                                                                                                                                                                                                                                                                                                                                                                                                                                                                                                                                                                         |
| Secondary Subject Heading:      | Epidemiology                                                                                                                                                                                                                                                                                                                                                                                                                                                                                                                                                                                                                                    |
| Keywords:                       | Cardiac Epidemiology < CARDIOLOGY, Thromboembolism < CARDIOLOGY, Pacing & electrophysiology < CARDIOLOGY                                                                                                                                                                                                                                                                                                                                                                                                                                                                                                                                        |
|                                 |                                                                                                                                                                                                                                                                                                                                                                                                                                                                                                                                                                                                                                                 |

SCHOLARONE™  
Manuscripts

1  
2  
3  
4 1 **Comparative thromboembolic risk in atrial fibrillation with and without a**  
5  
6  
7 2 **secondary precipitant– a Danish nationwide cohort study**  
8

9  
10 3 Anna Gundlund<sup>1</sup>, MD, PhD; Thomas Kümler<sup>2</sup>, MD, PhD; Anders Nissen Bonde<sup>1</sup>, MD; Jawad H.  
11  
12 4 Butt, MD<sup>6</sup>; Gunnar H. Gislason<sup>1,3,4</sup>, MD, PhD; Christian Torp-Pedersen<sup>5</sup>, MD, DMSc; Lars Køber<sup>6</sup>,  
13  
14 5 MD, DMSc; Jonas Bjerring Olesen<sup>1</sup>, MD, PhD; Emil Loldrup Fosbøl<sup>6</sup>, MD, PhD  
15  
16 6

17  
18  
19 7 **Institution**

20  
21 8 Department of Cardiology, Research Unit 1, Copenhagen University Hospital Herlev-Gentofte,  
22  
23 9 Kildegaardsvej 28, 2900 Hellerup, Denmark  
24  
25

26 10  
27  
28 11 **Affiliations**

29  
30 12 1: Department of Cardiology, Research Unit 1, Copenhagen University Hospital Herlev-Gentofte,  
31  
32 13 Hellerup, Denmark  
33  
34

35 14 2: Department of Cardiology, Copenhagen University Hospital Herlev-Gentofte, Herlev, Denmark  
36

37 15 3: The Danish Heart Foundation, Copenhagen, Denmark  
38

39 16 4: The National Institute of Public Health, University of Southern Denmark  
40

41  
42 17 5: Department of Health, Science and Technology, Aalborg University and departments of  
43  
44 18 Cardiology and Epidemiology/Biostatistics, Aalborg University Hospital, Denmark  
45

46  
47 19 6: Department of Cardiology, University Hospital of Copenhagen, Rigshospitalet  
48  
49 20

50  
51  
52 21 **Corresponding author:**

53  
54 22 Anna Gundlund, MD, PhD

55  
56 23 Department of Cardiology, Research Unit 1, Copenhagen University Hospital Herlev-Gentofte,  
57  
58 24 Hellerup, Denmark, Post 635  
59  
60



1  
2  
3  
4 1 Tel: 0045 50907119  
5

6 2 FAX: 38677642  
7

8  
9 3 Email: annagundlund@gmail.com  
10  
11  
12  
13  
14  
15  
16  
17  
18  
19  
20  
21  
22  
23  
24  
25  
26  
27  
28  
29  
30  
31  
32  
33  
34  
35  
36  
37  
38  
39  
40  
41  
42  
43  
44  
45  
46  
47  
48  
49  
50  
51  
52  
53  
54  
55  
56  
57  
58  
59  
60

For peer review only

1  
2  
3  
4 1 **Abstract:** 292 words (max 300 words)  
5

6 2 Objectives: We compared long-term outcomes in patients with atrial fibrillation (AF) with and  
7  
8  
9 3 without a secondary precipitant.  
10

11 4 Design and setting: Retrospective cohort study based on Danish nationwide registries.  
12

13 5 Participants: Patients with AF with and without secondary precipitants (1996-2015) were matched  
14  
15  
16 6 1:1 according to age, sex, calendar year, CHA<sub>2</sub>DS<sub>2</sub>-VASc score, and oral anticoagulation therapy  
17  
18 7 (OAC) therapy, resulting in a cohort of 39,723 patients with AF with a secondary precipitant and  
19  
20 8 the same number of patients with AF without a secondary precipitant. Secondary precipitants  
21  
22  
23 9 included alcohol intoxication, thyrotoxicosis, myocardial infarction, surgery, and infection in  
24  
25 10 conjunction with AF.  
26

27 11 Primary and secondary outcomes: The primary outcome in this study was thromboembolic events.  
28  
29  
30 12 Secondary outcomes included AF re-hospitalization and death. Long-term risks of outcomes were  
31  
32 13 examined by multivariable Cox regression analysis.  
33

34 14 Results: The most common precipitants were infection (55.0%), surgery (13.2%), and myocardial  
35  
36 15 infarction (12.0%). The 5-year absolute risk of thromboembolic events (taking death into account as  
37  
38  
39 16 a competing risk) in patients with AF grouped according to secondary precipitants were 8.3%  
40  
41 17 (alcohol intoxication), 8.5% (thyrotoxicosis), 12.1% (myocardial infarction), 11.6% (surgery),  
42  
43 18 12.2% (infection), 10.1% (>1 precipitant), and 12.3% (no secondary precipitant). In the  
44  
45  
46 19 multivariable analyses, AF with a secondary precipitant was associated with the same or an even  
47  
48 20 higher thromboembolic risk than AF without a secondary precipitant. One exception was patients  
49  
50 21 with AF and thyrotoxicosis: those not initiated on OAC therapy carried a lower thromboembolic  
51  
52 22 risk the 1<sup>st</sup> year of follow up than matched patients with AF without a secondary precipitant and no  
53  
54  
55 23 OAC therapy.  
56  
57  
58  
59  
60

1  
2  
3  
4 1 Conclusions: In general, AF with a secondary precipitant was associated with the same  
5  
6 2 thromboembolic risk as AF without a secondary precipitant. Consequently, this study highlights the  
7  
8 3 need for more research regarding the long-term management of patients with AF associated with a  
9  
10 4 secondary precipitant.  
11  
12

13 5 Key words: Secondary precipitant, reversible atrial fibrillation, recurrence  
14  
15  
16 6

17  
18  
19  
20  
21  
22  
23  
24  
25  
26  
27  
28  
29  
30  
31  
32  
33  
34  
35  
36  
37  
38  
39  
40  
41  
42  
43  
44  
45  
46  
47  
48  
49  
50  
51  
52  
53  
54  
55  
56  
57  
58  
59  
60

For peer review only

1  
2  
3  
4 **1 Article summary: strengths and limitations of this study**  
5

- 6  
7 2 • The study was based on high-quality nationwide registries with many years of follow up.  
8  
9 3 • Complete follow-up was possible  
10  
11 4 • Only associations could be drawn because of the retrospective and non-randomized design.  
12  
13  
14 5 • AF with and without a secondary precipitant were defined from diagnosis codes at discharge  
15  
16 6 • We had no data on electrocardiograms at discharge  
17  
18  
19 7

## 1 **Introduction**

2 The etiology of atrial fibrillation (AF) remains partly unknown. Studies have shown, that an  
3 inflammatory reaction inside the atria always precipitate AF.(1) However, in clinical practice, AF  
4 may occur as an isolated event or together with a secondary precipitant. AF is associated with a  
5 fivefold increased risk of ischemic stroke, and detailed treatment strategies regarding stroke  
6 prophylaxis in patients with AF occurring without secondary precipitants exist in both European  
7 and American treatment guidelines.(2–5)] In contrast, there is no consensus regarding stroke  
8 prophylaxis in patients with AF occurring with a secondary precipitant. Previous guidelines stated  
9 that AF occurring secondary to another precipitant usually will terminate without recurrence.(2) In  
10 current guidelines, however, this statement has been omitted, and the need for data regarding AF  
11 associated with a secondary precipitant highlighted.(4,5) Studies investigating long-term outcomes  
12 in AF associated with a secondary precipitant are sparse and data differentiating between different  
13 secondary precipitants and taking oral anticoagulation (OAC) therapy into account are missing.  
14 To address this lack in current knowledge, we aimed to compare long-term outcomes including  
15 thromboembolic events, AF re-hospitalization, and death in patients with AF with a secondary  
16 precipitant (incl. alcohol, intoxication, thyrotoxicosis, myocardial infarction, surgery, and infection)  
17 and patients with AF without a secondary precipitant. Further, we were able to differentiate  
18 between patients receiving and not receiving stroke prophylaxis with OAC therapy.

## 19 **Materials and methods**

### 20 *Data sources*

21 In Denmark, healthcare is tax-financed and with equal availability regardless of socioeconomic  
22 status. Date of birth, date and cause of death, emigration and immigration status, diagnosis and  
23 surgery codes etc. from all hospital contacts, fulfilled prescriptions of medicine, and several other  
24

1  
2  
3  
4  
5  
6  
7  
8  
9  
10  
11  
12  
13  
14  
15  
16  
17  
18  
19  
20  
21  
22  
23  
24  
25  
26  
27  
28  
29  
30  
31  
32  
33  
34  
35  
36  
37  
38  
39  
40  
41  
42  
43  
44  
45  
46  
47  
48  
49  
50  
51  
52  
53  
54  
55  
56  
57  
58  
59  
60

parameters are registered in different nationwide registries. Since all Danish citizens are provided a unique personal identifier code at birth (or immigration), data from the registries can be crosslinked on an individual level. We linked data from the following registries: The Danish Civil Registration System,(6) The Danish National Patient Registry (diagnoses were registered in terms of the International Classification of Diseases (ICD) system (ICD-8 until 1994 and in terms of ICD-10 thereafter)),(7) The Danish Register of Causes of Death,(8) and the Danish National Registry of Medicinal Statistics (medicine were registered according to the Anatomical Therapeutic Chemical classification system (ATC)).(9)

### *Study population*

The patient selection is depicted in Figure 1. We included all Danes diagnosed and admitted to a Danish hospital with AF for the first time between 1996 and 2015. Patients <18 years or >100 years and those with valvular AF (defined as AF without: rheumatic valve disease of aortic valve or mitral valve or prosthetic heart valve (any valve)) were excluded. Since there was a possibility that some of the patients had been diagnosed with AF at their general practitioner before their hospital admission, we excluded those who previously had fulfilled a prescription of antiarrhythmic therapy or rate-controlling drugs (incl. amiodarone, flecainide, and digoxin) and those who had fulfilled a prescription of OAC therapy up to 100 days before their hospital admission. Further, patients who died or had a thromboembolic event during the hospital admission or a constructed blanking period of 4 weeks from hospital discharge to the index date were excluded.

Patients were grouped in those with and without a secondary precipitant. Patients who had a diagnosis of one of the following precipitants from their AF hospital admission were defined as patients with a secondary precipitant: alcohol intoxication, thyrotoxicosis, myocardial infarction, and infection. Also, patients who were diagnosed with AF after, but during the same hospital

1 admission they received surgery were defined as having AF with a secondary precipitant. We  
2 restricted the population of patients with AF without a secondary precipitant to patients with AF  
3 without a diagnosis of a secondary precipitant from their hospital admission. Patients with AF with  
4 and without a secondary precipitant were matched 1:1 by incidence density sampling according to  
5 age (allowing a difference of up to two years), sex, calendar year (allowing a difference up to two  
6 years), CHA<sub>2</sub>DS<sub>2</sub>-VASc group (0, 1-2, >2) and OAC therapy status at the index date. Consequently,  
7 each case was matched with a control diagnosed at the same time and in the same age with AF.  
8 Further, the control had the same sex and was categorized in the same CHA<sub>2</sub>DS<sub>2</sub>-VASc group as  
9 the case. These patients comprised the study population. We used a previously described function to  
10 perform the match.(10)

### 11 12 *Long-term outcomes*

13 The index date was defined 4 weeks from AF hospital discharge. Initiation of OAC therapy and  
14 antiarrhythmic and rate controlling drugs was assessed during this blanking period from discharge  
15 to index date. Patients were followed from the index date and until the first event of the following:  
16 an outcome of interest, death, 5 years from the index date, emigration, or June 30, 2015. The  
17 primary outcome of interest was thromboembolic events (a composite of ischemic stroke, transient  
18 ischemic attack (TIA), and systemic thrombosis or embolism) while secondary outcomes included  
19 AF rehospitalization and all-cause death. AF rehospitalization was defined as a hospitalization with  
20 AF as the primary discharge diagnosis. The diagnoses of AF, ischemic stroke, and myocardial  
21 infarction have been validated in the Danish registries with positive predictive values of 93%, 97%,  
22 and 100%, respectively.(11,12)

## 1 2 3 4 1 *Statistics*

5  
6 2 Kaplan Meier curves for death were drawn and cumulative incidences of thromboembolic events  
7  
8  
9 3 (with incorporated competing risk of death) calculated using the Aalen Johansen estimator. The  
10  
11 4 Log-Rank test and the Gray's test were used to test for differences in the cumulative incidence of  
12  
13 5 long-term outcomes. Cox regression analyses were performed to calculate hazard ratios (HR) of  
14  
15 6 long-term outcomes in patients with AF with and without a secondary precipitant according to OAC  
16  
17 7 therapy at the index date. All analyzes were performed on the matched population. The multivariate  
18  
19 8 models were adjusted for other potential confounders than the matching criteria (incl. comorbidities  
20  
21 9 at the index date (incl. peripheral artery disease, heart failure, hypertension, prior thromboembolic  
22  
23 10 event, ischemic heart disease, chronic kidney disease, diabetes, prior bleeding event, cancer) and  
24  
25 11 antiarrhythmic and rate-controlling therapy during the blanking period (amiodarone, digoxin,  
26  
27 12 flecainide)). The analyses took matching variables into account and each group of patients with AF  
28  
29 13 with a secondary precipitant was compared with its respective matches from the matching  
30  
31 14 procedure. The models were tested for the assumption of proportional hazards. For specification of  
32  
33 15 diagnosis codes and ATC-codes please see Online Table 1. A P-value <0.05 was considered  
34  
35 16 statistically significant. All statistical analyses were performed in SAS statistical software version  
36  
37 17 9.4 or R.(13)  
38  
39  
40  
41  
42  
43  
44

## 45 19 *Other analyses*

46  
47  
48 20 Analyses of long-term outcomes were also performed on a non-matched population including all  
49  
50 21 patients available before the matching (Figure 1). To account for changes in OAC therapy status  
51  
52 22 over time, we did a sensitivity analysis not stratifying patients with regard to their OAC therapy  
53  
54 23 status at the index date, but instead adjusting for OAC therapy status as a time-dependent variable.  
55  
56  
57  
58  
59  
60



1  
2  
3  
4 1 Consequently, new initiations and discontinuations were taking into account. The method used, has  
5  
6 2 been used and described previously.(14–16)  
7  
8

9 3  
10  
11 4 *Ethics*  
12

13 5 Approval from the Research Ethics Committee System is not required in retrospective registry-  
14  
15 6 based studies in Denmark. The Danish Data Protection Agency approved use of data for this study  
16  
17 7 (ret.no: 2007-58-0015 / GEH-2014-013 I-Suite no: 02731).  
18  
19  
20 8

21  
22 9 *Patient and Public Involvement*  
23

24  
25 10 This was a retrospective study based on administrative registries. Patients and the public were not  
26  
27 11 involved in the development of the study.  
28  
29  
30 12

31  
32 13 *Data availability statement*  
33

34 14 This study was based on deidentified data about the entire Danish population. Data are not  
35  
36 15 available.  
37  
38  
39 16

40  
41 17 *Contributorship statement*  
42

43 18 The study idea was conceived by AG, TK, and ELF., study design was developed by AG, TK, JBO,  
44  
45 19 ANB, JHB, GHG, CTP, LK, and ELF, data analyses were made by AG. AG drafted the first version  
46  
47 20 of the paper and all authors participated in the critical discussions and interpretation of findings. All  
48  
49 21 authors have participated in the revisions of the draft and have approved the final version.  
50  
51  
52 22

53  
54 23 **Results**  
55

56  
57 24 *Study population*  
58  
59  
60

1  
2  
3  
4 1 As shown in Figure 1, the most common secondary precipitant was infection (21,824 patients,  
5 55.0%). Further, 335 (0.8%) patients had a concurrent alcohol intoxication, 2507 (6.3%) had  
6 2  
7 3 thyrotoxicosis, 4773 (12.0%) had acute myocardial infarction, 5229 (13.2%) had underwent  
8 4  
9 5 surgery, and 5055 (12.7%) had >1 precipitant. Of those with >1 precipitant, 4788 (94.7%) patients  
10 6  
11 7 had two secondary precipitants, while 267 (5.3%) had three or four secondary precipitants.  
12 8  
13 9 Infection and surgery was the most common combination of secondary precipitants. The patients  
14 10  
15 11 with >1 precipitant were grouped in one group, and were not included in the other groups of  
16 12  
17 13 patients with AF with a secondary precipitant. During the blanking period, 14% of the patients with  
18 14  
19 15 AF and a secondary precipitant and 2% of the patients with AF without a secondary precipitant  
20 16  
21 17 died, while 5% and 2%, respectively, had a thromboembolic event. These patients were excluded  
22 18  
23 19 before the matching.  
24 20  
25 21  
26 22  
27 23  
28 24  
29 25  
30 26  
31 27  
32 28  
33 29  
34 30  
35 31  
36 32  
37 33  
38 34  
39 35  
40 36  
41 37  
42 38  
43 39  
44 40  
45 41  
46 42  
47 43  
48 44  
49 45  
50 46  
51 47  
52 48  
53 49  
54 50  
55 51  
56 52  
57 53  
58 54  
59 55  
60 56

### Baseline characteristics

Baseline characteristics of the matched study population are shown in Table 1. In general, patients with AF with a secondary precipitant had more comorbidities than patients with AF without a secondary precipitant. Baseline characteristics of the non-matched population according to OAC therapy at the index date are shown in online Table 2 and 3. Especially those with AF and myocardial infarction, surgery, infection, and >1 precipitant were older, had more comorbidities, and higher risk scores for stroke and bleeding compared with patients with AF without a secondary precipitant. Among the patients with AF with a secondary precipitant (non-matched study population), 9.9% with alcohol intoxication, 43.9% with thyrotoxicosis, 27.2% with myocardial infarction, 21.9% with surgery, 27.1% with infection, and 21.4% with >1 precipitant received OAC therapy at the index date, respectively. Among patients with AF without a secondary precipitant, 38.5% received OAC therapy at the index date. In general for patients with AF with and without a

1  
2  
3  
4 1 secondary precipitant, those initiated on OAC therapy suffered from less cancer, chronic kidney  
5  
6 2 disease, peripheral artery disease, and had fewer previous bleeding events than those not initiated  
7  
8  
9 3 on OAC therapy. On the other hand, they were more likely to suffer from stroke risk factors (incl.  
10  
11 4 diabetes, heart failure, ischemic heart disease, and hypertension) than those not initiated on OAC  
12  
13 5 therapy. During the first year after the index date, 9.9% and 17.3% of patients with AF with and  
14  
15 6 without a secondary precipitant, respectively, had a new hospital admission with AF. One year after  
16  
17 7 the index date, 19.8% and 32.7% of the patients with AF with and without a secondary precipitant,  
18  
19 8 respectively, were in OAC therapy and 22.3% and 21.8% of the patients with AF with and without  
20  
21 9 a secondary precipitant, respectively, were in antiarrhythmic therapy.  
22  
23  
24  
25  
26  
27  
28

### 27 11 *Long-term outcomes*

29 12 Number of events, incidence rates, and crude and adjusted hazard ratios (HRs) of thromboembolic  
30  
31 13 events and death in AF patients with a secondary precipitant compared with AF patients without a  
32  
33 14 secondary precipitant initiated and not initiated on OAC therapy at the index date are presented in  
34  
35 15 Figure 2. With few exceptions, AF with a secondary precipitant was associated with the same  
36  
37 16 thromboembolic risk as AF without a secondary precipitant. Regardless of OAC therapy status at  
38  
39 17 the index date, AF with infection was associated with a significantly increased risk of  
40  
41 18 thromboembolic events compared with AF without a secondary precipitant. Among those not  
42  
43 19 initiated on OAC therapy, AF with thyrotoxicosis was associated with a significantly lower risk of  
44  
45 20 thromboembolic events compared with AF without a secondary precipitant. In those initiated on  
46  
47 21 OAC therapy, no differences in thromboembolic risk was observed between patients with AF and  
48  
49 22 thyrotoxicosis and patients with AF without a secondary precipitant. All subgroups of AF with a  
50  
51 23 secondary precipitant were associated with a significantly lower risk of AF re-hospitalization  
52  
53 24 compared with AF without a secondary precipitant (Figure 2).  
54  
55  
56  
57  
58  
59  
60

1  
2  
3  
4  
5  
6  
7  
8  
9  
10  
11  
12  
13  
14  
15  
16  
17  
18  
19  
20  
21  
22  
23  
24  
25  
26  
27  
28  
29  
30  
31  
32  
33  
34  
35  
36  
37  
38  
39  
40  
41  
42  
43  
44  
45  
46  
47  
48  
49  
50  
51  
52  
53  
54  
55  
56  
57  
58  
59  
60

1

2 Figure 3 and 4 depicts cumulative incidences of thromboembolic events and death in patients with  
3 AF with and without a secondary precipitant. During follow up, the cumulative incidence of  
4 thromboembolic events (taking death as an competing risk into account) according to type of  
5 secondary precipitant was 8.3% (alcohol intoxication), 8.5% (thyrotoxicosis), 12.1% (myocardial  
6 infarction), 11.6% (surgery), 12.2% (infection), 10.1% (>1 precipitant), and 12.3% (no secondary  
7 precipitant). The cumulative incidence of AF re-hospitalization were 19.6% (alcohol intoxication),  
8 30.8% (thyrotoxicosis), 27.2% (myocardial infarction), 14.8% (surgery), 20.9% (infection), 19.3%  
9 (>1 precipitant), and 34.4% (no secondary precipitant) (not included in the figures).

10 OAC therapy initiation compared with no OAC therapy initiation was associated with a lower  
11 thromboembolic risk in patients with AF with and without a secondary precipitant, although the  
12 results did not reach statistical significance in patients with AF with alcohol intoxication,  
13 thyrotoxicosis, myocardial infarction, and surgery as secondary precipitants (Figure 5).

#### 15 *Other analyses*

16 The long-term risk of thromboembolic events for patients with AF with and without a secondary  
17 precipitant in the non-matched population were comparable to the risks found in the main analysis,  
18 except that AF with thyrotoxicosis reached statistical significance and hence was associated with a  
19 significantly lower risk of thromboembolic events (HR 0.75, 95% CI 0.60-0.95 for those initiated  
20 on OAC therapy and HR 0.77, 95% CI 0.64-0.92 for those not initiated on OAC therapy). Further,  
21 among those initiated on OAC therapy, AF after surgery was associated with an increased risk of  
22 thromboembolic events (HR 1.23, 95% CI 1.01-1.50).

23 The sensitivity analysis, adjusting for OAC therapy status as a time-dependent variable, revealed  
24 results similar to those found in the main analysis (Online Figure 1).

1  
2  
3  
4 15  
6 2 **Discussion**7  
8  
9 3 We examined long-term outcomes in patients with AF with and without a secondary precipitant.10  
11 4 The study had two main findings: first, AF with different secondary precipitants was in general12  
13 5 associated with the same thromboembolic risk as AF without a secondary precipitant. Secondly,14  
15 6 OAC initiation-rates differed significantly according to type of secondary precipitant. Further, OAC16  
17 7 therapy vs. no OAC therapy were associated with a lower thromboembolic risk in those with AF18  
19 8 and infection and >1 precipitant while no significant risk-reduction was seen for patients with AF20  
21 9 with the other secondary precipitants.  
22  
23  
24

25 10

26  
27 11 *Thromboembolic risk*28  
29 12 Despite of lower re-hospitalization rates with AF, AF with a secondary precipitant was in general30  
31 13 associated with the same thromboembolic risk as AF without a secondary precipitant. AF with32  
33 14 thyrotoxicosis was associated with a lower thromboembolic risk compared with AF without a34  
35 15 secondary precipitant. In contrast, AF with infection was associated with an increased36  
37 16 thromboembolic risk compared with AF without a secondary precipitant. This is in accordance with38  
39 17 previous findings.(17–19) In two previous studies, Lubitz et al. and Fauchier et al. examined long-40  
41 18 term outcomes in patients with AF secondary to a reversible precipitant compared with patients42  
43 19 with AF without a secondary precipitant. In both studies, AF secondary to a reversible precipitant44  
45 20 was associated with the same thromboembolic risk as AF without secondary precipitants. However,46  
47 21 both studies were smaller and with patients included before 2012 and 2010, respectively.(20,21) In48  
49 22 summary, our results together with previous studies suggest that AF with a secondary precipitant in50  
51 23 general, and maybe with the exception of AF with thyrotoxicosis, may be considered as similar to52  
53 24 AF without a secondary precipitant with respect to thromboembolic risk.  
54  
55  
56  
57  
58  
59  
60

1  
2  
3  
4 15  
6 2 *OAC therapy*

7  
8  
9 3 OAC therapy showed a tendency towards a lower thromboembolic risk in patients with AF and a  
10  
11 4 secondary precipitant, but did only reach statistical significance for patients with AF and infection  
12  
13 5 and >1 precipitant. Recently, Quon et al. examined risk of thromboembolic events and bleeding in  
14  
15 6 patients with AF and acute coronary syndrome, acute pulmonary disease, and infection according to  
16  
17 7 OAC therapy status after discharge. In that study, OAC therapy was not associated with lower risk  
18  
19 8 of thromboembolic events in patients with AF and the before mentioned precipitants. However, the  
20  
21 9 analyses on long-term outcomes were based on logistic regression analysis, and did therefore not  
22  
23 10 include survival time in the model. Since patients with AF with a secondary precipitant in our study  
24  
25 11 seemed to die at a higher rate than patients with AF without a secondary precipitant, the time  
26  
27 12 perspective is crucial when studying long-term outcomes in this setting.(22) Studies with a clinical  
28  
29 13 randomized design would be able to show whether patients with AF with a secondary precipitant  
30  
31 14 benefit from OAC therapy on the same terms as patients with AF without a secondary precipitant.  
32  
33  
34  
35  
36  
37  
38

39 16 *OAC treatment-rates*

40  
41 17 The non-matched population allowed us to describe trends in OAC therapy initiation in patients  
42  
43 18 with AF with and without a secondary precipitant. In patients with AF without a secondary  
44  
45 19 precipitant, 38.5% of the patients were initiated on OAC therapy at the index date. This is in  
46  
47 20 accordance with previous findings, taking into account that our study period went back to 1996  
48  
49 21 when treatment rates were lower than today.(23,24) In 2017, Chean et al. assessed current practice  
50  
51 22 of AF among critically ill patients with new-onset AF. The study was based on questionnaires  
52  
53 23 answered by members of the Intensive Care Society in UK. The results revealed that 63.8% of the  
54  
55 24 respondents would not regularly anti-coagulate critically ill patients with new-onset AF. We found  
56  
57  
58  
59  
60

1  
2  
3  
4 1 important differences in OAC therapy initiation rates in patients with AF with a secondary  
5  
6 2 precipitant according to type of precipitant. Patients with alcohol intoxication had the lowest  
7  
8 3 initiation rate of OAC therapy (9.9%). Almost 50% of this patient group had a CHA<sub>2</sub>DS<sub>2</sub>-VASc  
9  
10 4 score of 0 and hence no indication for OAC therapy. Further patients with alcohol abuse may have  
11  
12 5 poor compliance and increased bleeding risk.<sup>(25)</sup> Consequently, there may be caution among  
13  
14 6 physicians in prescribing OACs for this patient group. In 2011, Traube and colleagues reviewed the  
15  
16 7 literature with respect to thromboembolic risk in patients with AF and thyrotoxicosis. They  
17  
18 8 concluded that OAC therapy should be initiated for those patients who did not have any  
19  
20 9 contraindications for treatment.<sup>(26)</sup> This could explain the high OAC treatment initiation rates in  
21  
22 10 this patient group (43.9%).  
23  
24  
25  
26  
27  
28  
29

### 30 12 *Limitations*

31  
32 13 First of all, this study was a retrospective registry-based study and hence no causative relationships  
33  
34 14 can be drawn. Our definition of AF with a secondary precipitant was based on diagnosis codes from  
35  
36 15 hospital admissions with AF and a reversible precipitant. Both diagnoses were registered at the  
37  
38 16 discharge date, and therefore we may have included patients in the group of AF with a secondary  
39  
40 17 precipitant who developed AF before the secondary precipitant (e.g. patients admitted with AF who  
41  
42 18 developed infection during their hospital stay), and thereby should have been classified as patients  
43  
44 19 with AF without a secondary precipitant. Moreover, we had no access to patient files, and we did  
45  
46 20 not know the duration of AF or whether the patients were discharged in sinus rhythm or with AF.  
47  
48 21 Also, no data were available with regard to the physicians' considerations when choosing between  
49  
50 22 OAC therapy and no OAC therapy, patients compliance, and measurements of international  
51  
52 23 normalized ratio (INR) and time in therapeutic range for warfarin users.  
53  
54  
55  
56  
57  
58  
59  
60

1  
2  
3  
4  
5  
6  
7  
8  
9  
10  
11  
12  
13  
14  
15  
16  
17  
18  
19  
20  
21  
22  
23  
24  
25  
26  
27  
28  
29  
30  
31  
32  
33  
34  
35  
36  
37  
38  
39  
40  
41  
42  
43  
44  
45  
46  
47  
48  
49  
50  
51  
52  
53  
54  
55  
56  
57  
58  
59  
60

1 The retrospective, registry-based nature of this study also precluded consideration of the specific  
2 impact of the molecular causes of both acute and chronic AF, including inflammatory activation  
3 and impaired nitric oxide (NO) availability and signaling. For example, specific patterns and extent  
4 of inflammatory activation associated with intercurrent infection could not be determined, and  
5 while impaired NO anti-aggregatory effect occurs in acute AF (27) and increased plasma  
6 concentrations of asymmetric dimethylarginine, which inhibits enzymatic generation of NO, predict  
7 thromboembolic risk in AF (28), neither of these parameters were measured in the current  
8 study. However, this study was based on a nationwide cohort of patients with many years of follow-  
9 up and data from high-quality registries. It reveals unexpected results that should be considered in  
10 future treatment guidelines for patients with AF and a secondary precipitant.

### 12 *Conclusion*

13 In this study we found that patients with AF and a secondary precipitant carried a similar associated  
14 thromboembolic risk as those with AF without a secondary precipitant. Current guidelines lack data  
15 on this subject and our results suggests that AF in relation to known triggers may be considered as  
16 AF in general.



## 1 **Funding**

2 This research received no specific grant from any funding agency in the public, commercial, or not-  
3 for-profit sectors.

## 4 **Conflicts of interest**

5 AG: None. TK: Consultant fees from BMS, Astra Zeneca, Roche, Boehringer-Ingelheim, Bayer,  
6 MSD. JBO: Speaker for Bristol-Myers Squibb, Boehringer Ingelheim, Bayer, and AstraZeneca.  
7 Consultant for Boehringer Ingelheim and Novo Nordisk. Funding for research from Bristol-Myers  
8 Squibb and The Capital Region of Denmark, Foundation for Health Research. ANB: None J.H.B:  
9 None. GHG: Research grants from Bayer, Bristol-Myers Squibb, AstraZeneca and Boehring  
10 Ingelheim. CTP: Consultant fees and research funding from Bayer and Biotronic LK: None. ELF:  
11 Has previously received research funding from Janssen and Janssen and Bristol-Myers Squibb.  
12

## 13 **Author contributions**

14 The study idea was conceived by AG, TK, and ELF, study design was developed by AG, TK, JBO,  
15 ANB, JHB, GHG, CTP, LK, and ELF, data analyses were made by AG. AG drafted the first version  
16 of the paper and all authors participated in the critical discussions and interpretation of findings. All  
17 authors have participated in the revisions of the draft and have approved the final version.  
18

## 19 **Acknowledgements**

20 None.

1  
2  
3  
4  
5  
6  
7  
8  
9  
10  
11  
12  
13  
14  
15  
16  
17  
18  
19  
20  
21  
22  
23  
24  
25  
26  
27  
28  
29  
30  
31  
32  
33  
34  
35  
36  
37  
38  
39  
40  
41  
42  
43  
44  
45  
46  
47  
48  
49  
50  
51  
52  
53  
54  
55  
56  
57  
58  
59  
60

1

2

For peer review only

## References

1. Procter NEK, Stewart S, Horowitz JD. New-onset atrial fibrillation and thromboembolic risk: Cardiovascular syzygy? *Heart Rhythm*. 2016;13(6):1355–61.
2. Fuster V, Rydén LE, Cannom DS, Crijns HJ, Curtis AB, Ellenbogen KA, et al. 2011 ACCF/AHA/HRS focused updates incorporated into the ACC/AHA/ESC 2006 guidelines for the management of patients with atrial fibrillation: a report of the American College of Cardiology Foundation/American Heart Association Task Force on practice guidelines. *Circulation*. 2011 Mar 15;123(10):e269-367.
3. Lip GYH, Lane DA. Stroke prevention in atrial fibrillation: a systematic review. *JAMA*. 2015 May 19;313(19):1950–62.
4. Kirchhof P, Benussi S, Kotecha D, Ahlsson A, Atar D, Casadei B, et al. 2016 ESC Guidelines for the management of atrial fibrillation developed in collaboration with EACTS. *Eur Heart J*. 2016 Oct 7;37(38):2893–962.
5. January CT, Wann LS, Alpert JS, Calkins H, Cleveland JC, Cigarroa JE, et al. 2014 AHA/ACC/HRS Guideline for the Management of Patients With Atrial Fibrillation. *Circulation*. 2014 Dec 2;130(23):e199–267.
6. Pedersen CB. The Danish Civil Registration System. *Scand J Public Health*. 2011 Jan 7;39(7 suppl):22–5.
7. Lynge E, Sandegaard JL, Rebolj M. The Danish National Patient Register. *Scand J Public Health*. 2011 Jan 7;39(7 suppl):30–3.
8. Helweg-Larsen K. The Danish Register of Causes of Death. *Scand J Public Health*. 2011 Jan 7;39(7 suppl):26–9.
9. Kildemoes HW, Sørensen HT, Hallas J. The Danish National Prescription Registry. *Scand J Public Health*. 2011 Jan 7;39(7 suppl):38–41.
10. Locally Written SAS Macros - Division of Biomedical Statistics and Informatics - Mayo Clinic Research [Internet]. Mayo Clinic. [cited 2017 May 3]. Available from: <http://www.mayo.edu/research/departments-divisions/department-health-sciences-research/division-biomedical-statistics-informatics/software/locally-written-sas-macros>
11. Rix TA, Riahi S, Overvad K, Lundbye-Christensen S, Schmidt EB, Joensen AM. Validity of the diagnoses atrial fibrillation and atrial flutter in a Danish patient registry. *Scand Cardiovasc J* SCJ. 2012 Jun;46(3):149–53.
12. Krarup L-H, Boysen G, Janjua H, Prescott E, Truelsen T. Validity of stroke diagnoses in a National Register of Patients. *Neuroepidemiology*. 2007;28(3):150–4.
13. R Core Team. R: A Language and Environment for Statistical Computing [Internet]. [cited 2017 Sep 19]. Available from: <https://www.R-project.org/>
14. Olesen JB, Lip GYH, Kamper A-L, Hommel K, Køber L, Lane DA, et al. Stroke and bleeding in atrial fibrillation with chronic kidney disease. *N Engl J Med*. 2012 Aug 16;367(7):625–35.
15. Lamberts M, Lip GYH, Hansen ML, Lindhardsen J, Olesen JB, Raunsø J, et al. Relation of nonsteroidal anti-inflammatory drugs to serious bleeding and thromboembolism risk in patients with atrial fibrillation receiving antithrombotic therapy: a nationwide cohort study. *Ann Intern Med*. 2014 Nov 18;161(10):690–8.
16. Fosbøl EL, Gislason GH, Jacobsen S, Abildstrom SZ, Hansen ML, Schramm TK, et al. The pattern of use of non-steroidal anti-inflammatory drugs (NSAIDs) from 1997 to 2005: a nationwide study on 4.6 million people. *Pharmacoepidemiol Drug Saf*. 2008 Aug 1;17(8):822–33.
17. Gundlund A, Kümler T, Olesen JB, Bonde AN, Gislason GH, Torp-Pedersen C, et al. Comparative thromboembolic risk in atrial fibrillation patients with and without a concurrent

- 1  
2  
3  
4 1 infection. *Am Heart J.* 2018 Jul 10;204:43–51.
- 5 2 18. Walkey AJ, Hammill BG, Curtis LH, Benjamin EJ. Long-term outcomes following  
6 3 development of new-onset atrial fibrillation during sepsis. *Chest.* 2014 Nov;146(5):1187–95.
- 7 4 19. Adderley NJ, Nirantharakumar K, Marshall T. Risk of stroke and transient ischaemic  
8 5 attack in patients with a diagnosis of resolved atrial fibrillation: retrospective cohort studies. *BMJ.*  
9 6 2018 May 9;361:k1717.
- 10 7 20. Lubitz SA, Yin X, Rienstra M, Schnabel RB, Walkey AJ, Magnani JW, et al. Long-  
11 8 term outcomes of secondary atrial fibrillation in the community: the Framingham Heart Study.  
12 9 *Circulation.* 2015 May 12;131(19):1648–55.
- 13 10 21. Fauchier L, Clementy N, Bisson A, Stamboul K, Ivanov F, Angoulvant D, et al.  
14 11 Prognosis in patients with atrial fibrillation and a presumed ‘temporary cause’ in a community-  
15 12 based cohort study. *Clin Res Cardiol Off J Ger Card Soc.* 2017 Mar;106(3):202–10.
- 16 13 22. Quon MJ, Behloul H, Pilote L. Anticoagulant Use and Risk of Ischemic Stroke and  
17 14 Bleeding in Patients With Secondary Atrial Fibrillation Associated With Acute Coronary  
18 15 Syndromes, Acute Pulmonary Disease, or Sepsis. *JACC Clin Electrophysiol.* 2017 Sep 27;500.
- 19 16 23. Gadsbøll K, Staerk L, Fosbøl EL, Sindet-Pedersen C, Gundlund A, Lip GYH, et al.  
20 17 Increased use of oral anticoagulants in patients with atrial fibrillation: temporal trends from 2005 to  
21 18 2015 in Denmark. *Eur Heart J.* 2017 Jan 21;
- 22 19 24. Gundlund A, Xian Y, Peterson ED, Butt JH, Gadsbøll K, Olesen JB, et al. Prestroke  
23 20 and Poststroke Antithrombotic Therapy in Patients With Atrial Fibrillation: Results From a  
24 21 Nationwide Cohort. *JAMA Netw Open.* 2018 May 18;1(1):e180171–e180171.
- 25 22 25. Roth JA, Bradley K, Thummel KE, Veenstra DL, Boudreau D. Alcohol misuse,  
26 23 genetics, and major bleeding among warfarin therapy patients in a community setting.  
27 24 *Pharmacoepidemiol Drug Saf.* 2015 Jun;24(6):619–27.
- 28 25 26. Traube E, Coplan NL. Embolic risk in atrial fibrillation that arises from  
29 26 hyperthyroidism: review of the medical literature. *Tex Heart Inst J.* 2011;38(3):225–8.
- 30 27 27. Procter NEK, Ball J, Liu S, Hurst N, Nooney VB, Goh V, et al. Impaired platelet  
31 28 nitric oxide response in patients with new onset atrial fibrillation. *Int J Cardiol.* 2015 Jan  
32 29 20;179:160–5.
- 33 30 28. Horowitz JD, De Caterina R, Heresztyn T, Alexander JH, Andersson U, Lopes RD, et  
34 31 al. Asymmetric and Symmetric Dimethylarginine Predict Outcomes in Patients With Atrial  
35 32 Fibrillation: An ARISTOTLE Substudy. *J Am Coll Cardiol.* 2018 Aug 14;72(7):721–33.
- 36  
37  
38  
39  
40  
41  
42  
43  
44  
45  
46  
47  
48  
49  
50  
51  
52  
53  
54  
55  
56  
57  
58  
59  
60

1  
2  
3  
4 **1 Figure legends**  
5

6 **2 Figure 1: Patient selection**  
7

8  
9 **3 Figure 2: Number of events, incidence rates, and crude and adjusted Hazard ratios of long-term**  
10  
11 **4 outcomes in patients with AF with and without a secondary precipitant.**  
12

13 **5 Figure 3: Cumulative incidence of thromboembolic events outcomes by secondary precipitant and**  
14  
15 **6 OAC therapy at the index date.**  
16

17  
18 **7 Figure 4: Cumulative incidence of death events outcomes by secondary precipitant and OAC**  
19  
20 **8 therapy at the index date.**  
21

22  
23 **9 Figure 5: Adjusted hazard ratios of long-term outcomes in patients with AF initiated vs. not**  
24  
25 **10 initiated on OAC therapy (stratified according to type of AF).**  
26  
27  
28  
29  
30  
31  
32  
33  
34  
35  
36  
37  
38  
39  
40  
41  
42  
43  
44  
45  
46  
47  
48  
49  
50  
51  
52  
53  
54  
55  
56  
57  
58  
59  
60

**Table 1: Baseline characteristics of the matched population**

|                                                      | Alcohol intoxication group |            | Thyrotoxicosis group |             | Myocardial infarction group |             | Surgery group |             | Infection group |               | >1 precipitant group |             |
|------------------------------------------------------|----------------------------|------------|----------------------|-------------|-----------------------------|-------------|---------------|-------------|-----------------|---------------|----------------------|-------------|
| +/- secondary precipitant:                           | +                          | -          | +                    | -           | +                           | -           | +             | -           | +               | -             | +                    | -           |
|                                                      | N=335                      | N=335      | N=2507               | N=2507      | N=4773                      | N=4773      | N=5229        | N=5229      | N=21,824        | N=21,824      | N=5055               | N=5055      |
| <b>Demographics</b>                                  |                            |            |                      |             |                             |             |               |             |                 |               |                      |             |
| Age, median (IQR*)                                   | 59 (49-66)                 | 59 (49-66) | 73 (63-81)           | 73 (63-81)  | 77 (69-83)                  | 77 (69-83)  | 75 (67-82)    | 75 (67-82)  | 79 (71-86)      | 79 (71-86)    | 76 (68-83)           | 76 (68-83)  |
| Male, n (%)                                          | 276 (82.4)                 | 276 (82.4) | 521 (20.8)           | 521 (20.8)  | 2705 (56.7)                 | 2705 (56.7) | 2724 (52.1)   | 2724 (52.1) | 10,370 (47.5)   | 10,370 (47.5) | 2676 (52.9)          | 2676 (52.9) |
| <b>Comorbidities, n (%)</b>                          |                            |            |                      |             |                             |             |               |             |                 |               |                      |             |
| Cancer                                               | 16 (4.8)                   | 29 (8.7)   | 288 (11.5)           | 296 (11.8)  | 586 (12.3)                  | 688 (14.4)  | 1349 (25.8)   | 882 (16.9)  | 4341 (19.9)     | 3571 (16.4)   | 958 (19.0)           | 807 (16.0)  |
| Chronic kidney disease                               | 11 (3.3)                   | 8 (2.4)    | 61 (2.4)             | 49 (2.0)    | 289 (6.1)                   | 233 (4.7)   | 352 (6.7)     | 198 (3.8)   | 1564 (7.2)      | 748 (3.4)     | 431 (8.5)            | 212 (4.2)   |
| COPD†                                                | 28 (8.4)                   | 23 (6.9)   | 234 (9.3)            | 221 (8.8)   | 619 (13.0)                  | 565 (11.8)  | 665 (12.7)    | 520 (9.9)   | 4696 (21.5)     | 2093 (9.6)    | 914 (18.1)           | 519 (10.3)  |
| Diabetes                                             | 26 (7.8)                   | 18 (5.4)   | 189 (7.5)            | 159 (6.3)   | 575 (12.0)                  | 556 (11.6)  | 503 (9.6)     | 423 (8.1)   | 2167 (9.9)      | 1737 (8.0)    | 498 (9.9)            | 554 (11.0)  |
| Heart failure                                        | 24 (7.2)                   | 18 (5.4)   | 445 (17.8)           | 388 (15.5)  | 1660 (34.8)                 | 1076 (22.5) | 966 (18.5)    | 851 (16.3)  | 5109 (23.4)     | 3709 (17.0)   | 1574 (31.1)          | 925 (18.3)  |
| Hypertension                                         | 64 (19.1)                  | 78 (23.3)  | 1309 (52.2)          | 1249 (49.8) | 3290 (68.9)                 | 3204 (67.1) | 2484 (47.5)   | 2695 (51.5) | 10,445 (47.9)   | 11,475 (52.6) | 2694 (53.3)          | 3007 (59.5) |
| IHD‡                                                 | 43 (12.8)                  | 53 (15.8)  | 333 (13.3)           | 455 (18.1)  | 4773 (100)                  | 1604 (33.6) | 1753 (33.5)   | 1332 (25.5) | 4696 (21.5)     | 5069 (23.2)   | 3072 (60.8)          | 1423 (28.2) |
| PAD§                                                 | 7 (2.1)                    | 8 (2.4)    | 78 (3.1)             | 83 (3.3)    | 375 (7.9)                   | 293 (6.1)   | 468 (9.0)     | 233 (4.5)   | 1392 (6.4)      | 932 (4.3)     | 448 (8.9)            | 269 (5.3)   |
| Prior bleeding event                                 | 81 (24.2)                  | 42 (12.5)  | 243 (9.7)            | 249 (9.9)   | 722 (15.1)                  | 715 (15.0)  | 1267 (24.2)   | 833 (15.9)  | 4319 (19.8)     | 3463 (15.9)   | 1171 (23.2)          | 811 (16.0)  |
| Prior thromboembolic event                           | 24 (7.2)                   | 24 (7.2)   | 138 (5.5)            | 183 (7.3)   | 483 (10.1)                  | 698 (14.6)  | 571 (10.9)    | 570 (10.9)  | 2651 (12.1)     | 2278 (10.4)   | 603 (11.9)           | 635 (12.6)  |
| <b>Risk scores</b>                                   |                            |            |                      |             |                             |             |               |             |                 |               |                      |             |
| CHA <sub>2</sub> DS <sub>2</sub> -VASc <sup>  </sup> |                            |            |                      |             |                             |             |               |             |                 |               |                      |             |
| Median (IQR*)                                        | 1 (0-2)                    | 1 (0-2)    | 3 (2-4)              | 3 (2-4)     | 4 (3-5)                     | 3 (3-4)     | 3 (2-4)       | 3 (2-4)     | 3 (2-4)         | 3 (2-4)       | 4 (2-5)              | 3 (2.4)     |
| 0                                                    | 158 (47.2)                 | 158 (47.2) | 405 (16.2)           | 405 (16.2)  | 0                           | 0           | 391 (7.5)     | 391 (7.5)   | 1328 (6.1)      | 1328 (6.1)    | 269 (5.3)            | 269 (5.3)   |
| 1-2                                                  | 118 (35.2)                 | 118 (35.2) | 530 (3.0)            | 530 (3.0)   | 670 (14.0)                  | 670 (14.0)  | 1406 (26.9)   | 1406 (26.9) | 5148 (23.6)     | 5148 (23.6)   | 1005 (19.9)          | 1005 (19.9) |
| ≥3                                                   | 59 (17.6)                  | 59 (17.6)  | 1572 (62.7)          | 1572 (62.7) | 4103 (86.0)                 | 4103 (86.0) | 3432 (65.6)   | 3432 (65.6) | 15,348 (70.3)   | 15,348 (70.3) | 3781 (74.8)          | 3781 (74.8) |
| HAS-BLED <sup>#</sup>                                |                            |            |                      |             |                             |             |               |             |                 |               |                      |             |
| Median (IQR*)                                        | 2 (1-3)                    | 1 (0-2)    | 2 (1-3)              | 2 (1-3)     | 3 (2-3)                     | 2 (2-3)     | 2 (1-3)       | 2 (1-3)     | 2 (1-3)         | 2 (1-3)       | 2 (2-3)              | 2 (2-3)     |
| 0                                                    | 0                          | 0          | 355 (14.2)           | 331 (13.2)  | 134 (2.8)                   | 76 (1.6)    | 289 (5.5)     | 381 (7.3)   | 1003 (4.6)      | 1147 (5.2)    | 208 (4.1)            | 242 (4.8)   |
| 1-2                                                  | 232 (69.3)                 | 155 (46.3) | 1460 (58.2)          | 1440 (57.4) | 2552 (53.5)                 | 2863 (54.8) | 2863 (54.8)   | 2935 (56.1) | 12,130 (55.6)   | 12,129 (55.6) | 2422 (47.9)          | 2638 (52.2) |
| ≥3                                                   | 103 (30.8)                 | 52 (15.5)  | 692 (27.6)           | 736 (29.4)  | 2145 (6.7)                  | 2077 (6.5)  | 2077 (39.7)   | 1913 (36.6) | 8691 (39.8)     | 8548 (39.2)   | 2425 (48.0)          | 2175 (43.0) |
| <b>Pharmacotherapy, n (%)</b>                        |                            |            |                      |             |                             |             |               |             |                 |               |                      |             |
| OAC** therapy, n (%)                                 | 33 (9.9)                   | 33 (9.9)   | 1100 (43.9)          | 1100 (43.9) | 1311 (27.5)                 | 1311 (27.5) | 1150 (22.0)   | 1150 (22.0) | 5985 (27.4)     | 5985 (27.4)   | 1087 (21.5)          | 1087 (21.5) |
| Amiodarone                                           | ≤3                         | 6 (1.8)    | 33 (1.3)             | 62 (2.5)    | 359 (7.5)                   | 158 (3.3)   | 443 (8.5)     | 163 (3.1)   | 617 (2.8)       | 574 (2.6)     | 418 (8.3)            | 154 (3.0)   |

|    |                                                                                                                                                                                                                     |           |          |             |            |             |             |             |             |             |             |             |             |
|----|---------------------------------------------------------------------------------------------------------------------------------------------------------------------------------------------------------------------|-----------|----------|-------------|------------|-------------|-------------|-------------|-------------|-------------|-------------|-------------|-------------|
| 1  |                                                                                                                                                                                                                     |           |          |             |            |             |             |             |             |             |             |             |             |
| 2  | Digoxin                                                                                                                                                                                                             | 49 (14.6) | 29 (8.7) | 1000 (39.9) | 916 (36.5) | 1207 (25.3) | 1502 (31.5) | 1089 (20.8) | 1285 (24.6) | 7973 (36.5) | 6286 (28.8) | 1184 (23.4) | 1223 (24.2) |
| 3  | Flecainide                                                                                                                                                                                                          | 0 (0)     | ≤ 3      | 13 (0.5)    | 29 (1.2)   | 9 (0.2)     | 32 (0.7)    | 12 (0.2)    | 52 (1.0)    | 40 (0.2)    | 156 (0.7)   | 6 (0.1)     | 27 (0.5)    |
| 4  | *IQR: interquartile range. †COPD: chronic obstructive pulmonary disease. ‡IHD: ischemic heart disease. §PAD: peripheral artery disease.   CHA <sub>2</sub> DS <sub>2</sub> -VASc: Risk score for stroke: congestive |           |          |             |            |             |             |             |             |             |             |             |             |
| 5  | heart failure/LV function, hypertension, age 65-74 years, age>74 years (2 points), diabetes, stroke/TIA/systemic embolism (2 points), vascular disease, sex category (female); #HAS-BLED: Risk                      |           |          |             |            |             |             |             |             |             |             |             |             |
| 6  | score for bleeding: hypertension, abnormal renal/liver function, history of stroke, history of bleeding, INR (left out due to missing data), age>65 years, drug consumption with antiplatelet                       |           |          |             |            |             |             |             |             |             |             |             |             |
| 7  | agents/non-steroidal inflammatory drugs, alcohol abuse. **OAC: oral anticoagulation.                                                                                                                                |           |          |             |            |             |             |             |             |             |             |             |             |
| 8  |                                                                                                                                                                                                                     |           |          |             |            |             |             |             |             |             |             |             |             |
| 9  |                                                                                                                                                                                                                     |           |          |             |            |             |             |             |             |             |             |             |             |
| 10 |                                                                                                                                                                                                                     |           |          |             |            |             |             |             |             |             |             |             |             |
| 11 |                                                                                                                                                                                                                     |           |          |             |            |             |             |             |             |             |             |             |             |
| 12 |                                                                                                                                                                                                                     |           |          |             |            |             |             |             |             |             |             |             |             |
| 13 |                                                                                                                                                                                                                     |           |          |             |            |             |             |             |             |             |             |             |             |
| 14 |                                                                                                                                                                                                                     |           |          |             |            |             |             |             |             |             |             |             |             |
| 15 |                                                                                                                                                                                                                     |           |          |             |            |             |             |             |             |             |             |             |             |
| 16 |                                                                                                                                                                                                                     |           |          |             |            |             |             |             |             |             |             |             |             |
| 17 |                                                                                                                                                                                                                     |           |          |             |            |             |             |             |             |             |             |             |             |
| 18 |                                                                                                                                                                                                                     |           |          |             |            |             |             |             |             |             |             |             |             |
| 19 |                                                                                                                                                                                                                     |           |          |             |            |             |             |             |             |             |             |             |             |
| 20 |                                                                                                                                                                                                                     |           |          |             |            |             |             |             |             |             |             |             |             |
| 21 |                                                                                                                                                                                                                     |           |          |             |            |             |             |             |             |             |             |             |             |
| 22 |                                                                                                                                                                                                                     |           |          |             |            |             |             |             |             |             |             |             |             |
| 23 |                                                                                                                                                                                                                     |           |          |             |            |             |             |             |             |             |             |             |             |
| 24 |                                                                                                                                                                                                                     |           |          |             |            |             |             |             |             |             |             |             |             |
| 25 |                                                                                                                                                                                                                     |           |          |             |            |             |             |             |             |             |             |             |             |
| 26 |                                                                                                                                                                                                                     |           |          |             |            |             |             |             |             |             |             |             |             |
| 27 |                                                                                                                                                                                                                     |           |          |             |            |             |             |             |             |             |             |             |             |
| 28 |                                                                                                                                                                                                                     |           |          |             |            |             |             |             |             |             |             |             |             |
| 29 |                                                                                                                                                                                                                     |           |          |             |            |             |             |             |             |             |             |             |             |
| 30 |                                                                                                                                                                                                                     |           |          |             |            |             |             |             |             |             |             |             |             |
| 31 |                                                                                                                                                                                                                     |           |          |             |            |             |             |             |             |             |             |             |             |
| 32 |                                                                                                                                                                                                                     |           |          |             |            |             |             |             |             |             |             |             |             |
| 33 |                                                                                                                                                                                                                     |           |          |             |            |             |             |             |             |             |             |             |             |
| 34 |                                                                                                                                                                                                                     |           |          |             |            |             |             |             |             |             |             |             |             |
| 35 |                                                                                                                                                                                                                     |           |          |             |            |             |             |             |             |             |             |             |             |
| 36 |                                                                                                                                                                                                                     |           |          |             |            |             |             |             |             |             |             |             |             |
| 37 |                                                                                                                                                                                                                     |           |          |             |            |             |             |             |             |             |             |             |             |
| 38 |                                                                                                                                                                                                                     |           |          |             |            |             |             |             |             |             |             |             |             |
| 39 |                                                                                                                                                                                                                     |           |          |             |            |             |             |             |             |             |             |             |             |
| 40 |                                                                                                                                                                                                                     |           |          |             |            |             |             |             |             |             |             |             |             |
| 41 |                                                                                                                                                                                                                     |           |          |             |            |             |             |             |             |             |             |             |             |
| 42 |                                                                                                                                                                                                                     |           |          |             |            |             |             |             |             |             |             |             |             |
| 43 |                                                                                                                                                                                                                     |           |          |             |            |             |             |             |             |             |             |             |             |
| 44 |                                                                                                                                                                                                                     |           |          |             |            |             |             |             |             |             |             |             |             |
| 45 |                                                                                                                                                                                                                     |           |          |             |            |             |             |             |             |             |             |             |             |
| 46 |                                                                                                                                                                                                                     |           |          |             |            |             |             |             |             |             |             |             |             |

For peer review only

1  
2  
3  
4  
5  
6  
7  
8  
9  
10  
11  
12  
13  
14  
15  
16  
17  
18  
19  
20  
21  
22  
23  
24  
25  
26  
27  
28  
29  
30  
31  
32  
33  
34  
35  
36  
37  
38  
39  
40  
41  
42  
43  
44  
45  
46

For peer review only



1  
2  
3  
4  
5  
6  
7  
8  
9  
10  
11  
12  
13  
14  
15  
16  
17  
18  
19  
20  
21  
22  
23  
24  
25  
26  
27  
28  
29  
30  
31  
32  
33  
34  
35  
36  
37  
38  
39  
40  
41

AF for the first time with a  
secondary precipitant, 1996-2015  
N=66,242

AF for the first time without a  
secondary precipitant, 1996-2015  
N=138,618

**Exclusions (N=26,166)**

- <18 years or > 100 years, N=134
- Valvular atrial fibrillation, N=2038
- Atrial fibrillation therapy before hospital admission, N=13,916
- Dead or emigrated during the blanking period, N=7366
- Thromboembolic event during the blanking period, N=2712

**Exclusions (N=40,430)**

- <18 years or > 100 years, N=278
- Valvular atrial fibrillation, N=2550
- Atrial fibrillation therapy before hospital admission, N=33,629
- Dead or emigrated during the blanking period, N=1992
- Thromboembolic event during the blanking period, N=1981

**Complete study population**

AF with secondary precipitant  
N=40,076

AF without secondary precipitant  
N=98,188

**Matched population**

- 39,723 patients with AF with secondary precipitant
  - 335 (0.8%) with alcohol intoxication
  - 2507 (6.3%) with thyrotoxicosis
  - 4773 (12.0%) with myocardial infarction
  - 5229 (13.2%) had had surgery
  - 21,824 (55.0%) with infection
  - 5055 (12.7%) with >1 precipitant
- 39,723 patients with AF without a secondary precipitant



112x90mm (300 x 300 DPI)



160x94mm (300 x 300 DPI)

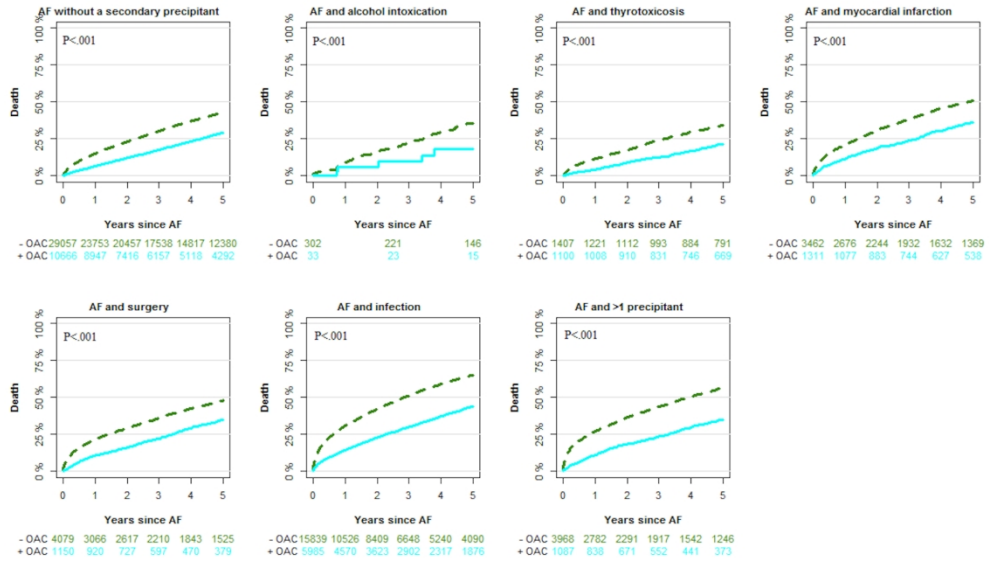

160x94mm (300 x 300 DPI)

1  
2  
3  
4  
5  
6  
7  
8  
9  
10  
11  
12  
13  
14  
15  
16  
17  
18  
19  
20  
21  
22  
23  
24  
25  
26  
27  
28  
29  
30  
31  
32  
33  
34  
35  
36  
37  
38  
39  
40  
41  
42  
43  
44  
45  
46  
47  
48  
49  
50  
51  
52  
53  
54  
55  
56  
57  
58  
59  
60

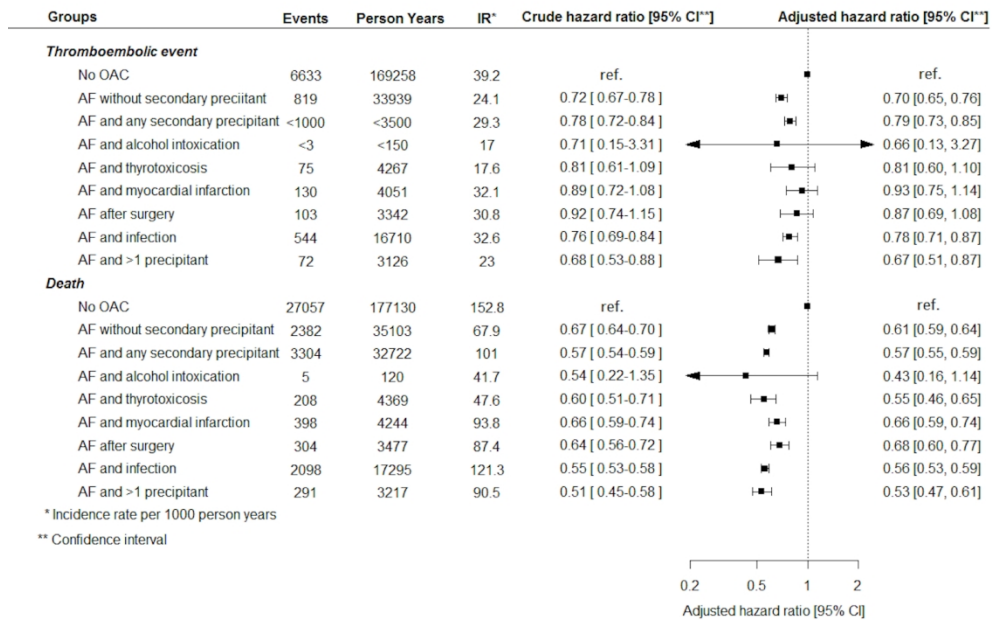

134x90mm (300 x 300 DPI)

## Supplemental material

### Comparative thromboembolic risk in atrial fibrillation with and without a secondary precipitant – a Danish nationwide cohort study

Anna Gundlund, MD, PhD; Thomas Kümler, MD, PhD; Anders N. Bonde, MD; Jawad H. Butt, MD; Gunnar H. Gislason, MD, PhD; Christian Torp-Pedersen, MD, DMSc; Lars Køber, MD, DMSc; Jonas B. Olesen, MD, PhD; Emil L. Fosbøl, MD, PhD

Online Table 1: Specification of diagnoses by international classification of diseases (ICD-8 and ICD-10) codes and pharmacotherapy by anatomical therapeutic chemical classification (ATC) codes.

Online Table 2: Baseline characteristics of the non-matched population, patients initiated on OAC therapy

Online Table 3: Baseline characteristics of the non-matched population, patients not initiated on OAC therapy

Online Figure 1: Adjusted Hazard ratios of long-term outcomes in patients with AF with and without a secondary precipitant. Adjustments: age groups, peripheral artery disease, heart failure, hypertension, prior thromboembolic event, ischemic heart disease, chronic kidney disease, diabetes, prior bleeding event, cancer, antiarrhythmic therapy (amiodarone, digoxin, flecainide) at the index date and OAC therapy status as a time-dependent variable.

**Online Table 1: Specification of diagnoses by international classification of diseases (ICD-8 and ICD-10) codes and pharmacotherapy by anatomical therapeutic chemical classification (ATC) codes.**

| <b>Precipitants</b>                    | <b>ICD-10 codes and NCSP, NOMESCO Classification of Surgical Procedures</b>                                                                                                                                                                                                                                                                                                                                                                                                                                                                                                                                           |
|----------------------------------------|-----------------------------------------------------------------------------------------------------------------------------------------------------------------------------------------------------------------------------------------------------------------------------------------------------------------------------------------------------------------------------------------------------------------------------------------------------------------------------------------------------------------------------------------------------------------------------------------------------------------------|
| Alcohol intoxication                   | ICD-10: F100, F103, F104, R780, T51, X65                                                                                                                                                                                                                                                                                                                                                                                                                                                                                                                                                                              |
| Infections                             | ICD-10:<br>Certain infectious and parasitic diseases: A00-B99.<br>Infections in the eye and adnexa: H00, H01, H10, H20, H30, H44, H60, H65-H68, H70, H73.0, H73.1<br>Infections in the cardiovascular organs: I30, I32, I33, I38-I41<br>Infections in pulmonary system: J00-J22, J32, J36, J85, J86<br>Infections in the gastrointestinal system: K12, K20, K35-K37, K57, K65, K67, K81, K85<br>Infections in the skin, subcutaneous tissue, bones, muscles, and connective tissue: L00-L08, M00, M01, M60, M63.2, M65, M86, M90.0, M90.1, M90.2<br>Infections in the urogenital system: N00, N01, N05, N30, N70-N77. |
| Myocardial infarction                  | ICD-10: I21                                                                                                                                                                                                                                                                                                                                                                                                                                                                                                                                                                                                           |
| Pulmonary embolism                     | ICD-10: I260, I269, O882D, O882E, T817D                                                                                                                                                                                                                                                                                                                                                                                                                                                                                                                                                                               |
| Surgery                                | NCSP, NOMESCO Classification of Surgical Procedures: KF, KM, KN, KD, KPH, KPJ, KJ, KH, KQ, KB, KC, KL, KE, KA, KG, KK.                                                                                                                                                                                                                                                                                                                                                                                                                                                                                                |
| Thyrotoxicosis                         | ICD-10: E05                                                                                                                                                                                                                                                                                                                                                                                                                                                                                                                                                                                                           |
| <b>Outcomes</b>                        |                                                                                                                                                                                                                                                                                                                                                                                                                                                                                                                                                                                                                       |
| Atrial fibrillation re-hospitalization | Hospital admission with primary diagnosis of atrial fibrillation: I48                                                                                                                                                                                                                                                                                                                                                                                                                                                                                                                                                 |
| Thromboembolic event                   | Ischemic stroke: I63, I64<br>Death from stroke: I61-I64<br>Transient ischemic attack: G458, G459<br>Thrombosis or embolism in arteries: I74                                                                                                                                                                                                                                                                                                                                                                                                                                                                           |
| <b>Comorbidities</b>                   | <b>ICD-8 and ICD-10 codes</b>                                                                                                                                                                                                                                                                                                                                                                                                                                                                                                                                                                                         |

1  
2  
3  
4  
5  
6  
7  
8  
9  
10  
11  
12  
13  
14  
15  
16  
17  
18  
19  
20  
21  
22  
23  
24  
25  
26  
27  
28  
29  
30  
31  
32  
33  
34  
35  
36  
37  
38  
39  
40  
41  
42  
43  
44  
45  
46  
47  
48  
49  
50  
51  
52  
53  
54  
55  
56  
57  
58  
59  
60

|                                       |                                                                                                                                                                                                                                                                                                                                                                           |
|---------------------------------------|---------------------------------------------------------------------------------------------------------------------------------------------------------------------------------------------------------------------------------------------------------------------------------------------------------------------------------------------------------------------------|
| Atrial fibrillation                   | ICD-10: I48<br>ICD-8: 42793, 42794                                                                                                                                                                                                                                                                                                                                        |
| Alcohol abuse                         | ICD-10: E24.4, E52, F10, G31.2, G62.1, G72.1, I42.6, K29.2, K70, K86.0, L27.8A, O35.4, T51, Z71.4, Z72.1.<br><br>ATC: N07BB                                                                                                                                                                                                                                               |
| Cancer                                | ICD-10: C                                                                                                                                                                                                                                                                                                                                                                 |
| Chronic kidney disease                | ICD-10: E10.2, E11.2, E13.2, E14.2, I12.0, M32.1B, N02-N08, N11, N12, N14, N15.8, N15.9, N16.0, N16.2-N16.4, N16.8, N18, N19, N26, Q61                                                                                                                                                                                                                                    |
| Chronic obstructive pulmonary disease | ICD-10: J42, J43, J44                                                                                                                                                                                                                                                                                                                                                     |
| Diabetes                              | ATC: A10 (3 months before index)                                                                                                                                                                                                                                                                                                                                          |
| Heart failure                         | ICD-10: I11.0, I42, I50, J81                                                                                                                                                                                                                                                                                                                                              |
| Hypertension                          | Usage of a combination of at least two of the seven different drug classes at the same time: <ol style="list-style-type: none"> <li>1. Non-loop diuretics</li> <li>2. Loop diuretics</li> <li>3. Antiadrenergic agents</li> <li>4. Beta-blockers</li> <li>5. Vasodilators</li> <li>6. Calcium channel blockers</li> <li>7. Renin-angiotensin system inhibitors</li> </ol> |
| Ischemic heart disease                | ICD-10: I20-I25                                                                                                                                                                                                                                                                                                                                                           |
| Peripheral artery disease             | ICD-10: I70                                                                                                                                                                                                                                                                                                                                                               |
| Prior bleeding                        | ICD-10: D50.0, D62, G951A, H31.3, H05.2A, H35.6, H43.1, H45.0, I31.2, I60-I62, I85.0, I86.4A, J94.2, K22.8F, K25.0, K25.2, K25.4, K25.6, K26.0, K26.2, K26.4, K26.6, K27.0, K27.2, K27.4, K27.6, K28.0, K28.2, K28.4, K28.6, K29.8A, K62.5, K63.8B, K63.8C, K66.1, K83.8F, K86.8G, K92.0-K92.2, N02, R04, R31, S06.4-S06.6, S36.8D                                        |
| Thromboembolic event                  | ICD-10: G45.8, G45.9, I63, I64, I74                                                                                                                                                                                                                                                                                                                                       |
| Valvular atrial fibrillation          | Atrial fibrillation without:<br>ICD-10: I05, I06, I080A, I081A, I082A, I083A, Z952, Z954<br>ICD-8: 39500-39502, 39508, 39509, 39600-39604, 39608, 39609<br>Procedures: FKD, FKH, FMD, FMH, FGE, FJE                                                                                                                                                                       |
| <b>Pharmacotherapy</b>                | <b>ACT-codes</b>                                                                                                                                                                                                                                                                                                                                                          |



1  
2  
3  
4  
5  
6  
7  
8  
9  
10  
11  
12  
13  
14  
15  
16  
17  
18  
19  
20  
21  
22  
23  
24  
25  
26  
27  
28  
29  
30  
31  
32  
33  
34  
35  
36  
37  
38  
39  
40  
41  
42  
43  
44  
45  
46  
47  
48  
49  
50  
51  
52  
53  
54  
55  
56  
57  
58  
59  
60

|                                     |                                                                                                                       |
|-------------------------------------|-----------------------------------------------------------------------------------------------------------------------|
| ADP-receptor blockers               | B01AC04, B01AC22, B01AC24                                                                                             |
| Amiodarone                          | C01BD01                                                                                                               |
| Antiadrenergic agents               | C02A, C02B, C02C                                                                                                      |
| Oral anticoagulation therapy        | Vitamin K antagonists: B01AA03, B01AA04<br>Non-vitamin K antagonist oral anticoagulants:<br>B01AF01, B01AF02, B01AE07 |
| Beta-blockers                       | C07A, C07B, C07C, C07D, C07F                                                                                          |
| Calcium channel blockers            | C08, C09BB, C09DB                                                                                                     |
| Digoxin                             | C01AA                                                                                                                 |
| Flecainide                          | C01BC                                                                                                                 |
| Loop diuretics                      | C03C, C03EB                                                                                                           |
| Non-loop diuretics                  | C02DA, C03EA, C03EB, C02L, C03A, C03B,<br>C03D, C03E, C03X, C07B, C07C, C07D, C08G,<br>C09BA, C09DA, C09XA52          |
| Renin-angiotensin system inhibitors | C09AA, C09BA, C09BB, C09CA, C09DA,<br>C09DB, C09XA02, C09XA52                                                         |
| Vasodilators                        | C02DB, C02DD, C02DG                                                                                                   |

**Online Table 2: Baseline characteristics of the non-matched population, patients initiated on OAC therapy**

|                                        | AF with a secondary precipitant<br>N=10,673 |                               |                                    |                   |                     |                          | AF without a<br>secondary<br>precipitant<br>N=37,827 |
|----------------------------------------|---------------------------------------------|-------------------------------|------------------------------------|-------------------|---------------------|--------------------------|------------------------------------------------------|
|                                        | Alcohol<br>intoxication<br>N=33             | Thyro-<br>toxicosis<br>N=1103 | Myocardial<br>infarction<br>N=1312 | Surgery<br>N=1151 | Infection<br>N=5987 | >1 precipitant<br>N=1087 |                                                      |
| <b>Demographics</b>                    |                                             |                               |                                    |                   |                     |                          |                                                      |
| Age, median (IQR*)                     | 64 (55-68)                                  | 72 (64-79)                    | 75 (68-81)                         | 74 (67-81)        | 77 (69-83)          | 75 (68-81)               | 72 (64-79)                                           |
| Male, n (%)                            | 28 (84.8)                                   | 259 (23.5)                    | 842 (64.2)                         | 667 (57.9)        | 3189 (53.3)         | 634 (58.3)               | 21,386 (56.5)                                        |
| <b>Comorbidities, n (%)</b>            |                                             |                               |                                    |                   |                     |                          |                                                      |
| Cancer                                 | ≤3                                          | 114 (10.3)                    | 146 (11.1)                         | 239 (20.8)        | 927 (15.5)          | 171 (15.1)               | 4617 (12.2)                                          |
| Chronic kidney disease                 | 4 (12.1)                                    | 23 (2.1)                      | 62 (4.7)                           | 65 (5.6)          | 372 (6.2)           | 59 (5.4)                 | 1011 (2.7)                                           |
| COPD†                                  | ≤3                                          | 106 (9.6)                     | 133 (10.1)                         | 128 (11.1)        | 1251 (20.9)         | 157 (14.4)               | 3426 (9.1)                                           |
| Diabetes                               | ≤3                                          | 84 (7.6)                      | 159 (12.1)                         | 111 (9.6)         | 712 (11.9)          | 112 (10.3)               | 3384 (8.9)                                           |
| Heart failure                          | 6 (18.2)                                    | 236 (21.4)                    | 464 (35.4)                         | 228 (19.8)        | 1440 (24.1)         | 359 (33.0)               | 6791 (18.0)                                          |
| Hypertension                           | 11 (33.3)                                   | 658 (59.7)                    | 982 (74.8)                         | 687 (59.7)        | 3652 (61.0)         | 723 (66.5)               | 23,057 (61.0)                                        |
| IHD‡                                   | 5 (15.2)                                    | 129 (11.7)                    | 1312 (100)                         | 434 (37.7)        | 1202 (20.1)         | 744 (68.4)               | 7360 (19.5)                                          |
| PAD§                                   | ≤3                                          | 29 (2.6)                      | 83 (6.3)                           | 101 (8.8)         | 353 (5.9)           | 77 (7.1)                 | 1258 (3.3)                                           |
| Prior bleeding event                   | 7 (21.2)                                    | 86 (7.8)                      | 150 (11.4)                         | 213 (18.5)        | 966 (16.1)          | 182 (16.7)               | 4564 (12.1)                                          |
| Prior thromboembolic event             | ≤3                                          | 60 (5.4)                      | 142 (10.8)                         | 153 (13.3)        | 672 (11.2)          | 133 (12.2)               | 3313 (8.8)                                           |
| <b>Risk scores</b>                     |                                             |                               |                                    |                   |                     |                          |                                                      |
| CHA <sub>2</sub> DS <sub>2</sub> -VASc |                                             |                               |                                    |                   |                     |                          |                                                      |
| Median (IQR*)                          | 1 (0-2)                                     | 3 (2-4)                       | 4 (3-5)                            | 3 (2-4)           | 3 (2-4)             | 4 (3-5)                  | 3 (2-4)                                              |
| 0                                      | 11 (33.3)                                   | 134 (12.2)                    | 0                                  | 74 (6.4)          | 269 (4.5)           | 28 (2.6)                 | 3592 (9.5)                                           |
| 1-2                                    | 16 (48.5)                                   | 263 (23.8)                    | 181 (13.8)                         | 289 (25.1)        | 1493 (24.9)         | 181 (16.6)               | 12,341 (32.6)                                        |
| ≥3                                     | 6 (18.2)                                    | 706 (64.0)                    | 1131 (86.2)                        | 788 (68.5)        | 4225 (70.6)         | 878 (80.8)               | 21,894 (57.9)                                        |
| HAS-BLED#                              |                                             |                               |                                    |                   |                     |                          |                                                      |
| Median (IQR*)                          | 2 (1-3)                                     | 2 (1-2)                       | 3 (2-3)                            | 2 (1-3)           | 2 (1-3)             | 2 (2-3)                  | 2 (1-3)                                              |
| 0                                      | 0                                           | 128 (11.6)                    | 32 (2.4)                           | 60 (5.2)          | 259 (4.3)           | 33 (3.0)                 | 3361 (8.9)                                           |
| 1-2                                    | 21 (63.6)                                   | 706 (64.0)                    | 571 (43.5)                         | 611 (53.1)        | 3433 (57.3)         | 515 (47.4)               | 22,792 (60.3)                                        |
| ≥3                                     | 12 (36.4)                                   | 269 (24.4)                    | 709 (54.0)                         | 480 (41.7)        | 2295 (38.3)         | 539 (49.6)               | 11,674 (30.9)                                        |
| <b>Pharmacotherapy, n (%)</b>          |                                             |                               |                                    |                   |                     |                          |                                                      |

|            |           |            |            |            |             |            |               |
|------------|-----------|------------|------------|------------|-------------|------------|---------------|
| Amiodarone | 0         | 19 (1.7)   | 104 (7.9)  | 181 (15.7) | 261 (4.4)   | 141 (13.0) | 1493 (3.9)    |
| Digoxin    | 11 (33.3) | 605 (54.9) | 437 (33.3) | 312 (27.1) | 2847 (47.6) | 368 (33.9) | 14,803 (39.1) |
| Flecainide | 0         | 5 (0.5)    | ≤3         | ≤3         | 10 (0.2)    | ≤3         | 248 (0.7)     |

\*IQR: interquartile range. †COPD: chronic obstructive pulmonary disease. ‡IHD: ischemic heart disease. §PAD: peripheral artery disease. ||CHA<sub>2</sub>DS<sub>2</sub>-VASc: Risk score for stroke: congestive heart failure/LV function, hypertension, age 65-74 years, age>74 years (2 points), diabetes, stroke/TIA/systemic embolism (2 points), vascular disease, sex category (female); #HAS-BLED: Risk score for bleeding: hypertension, abnormal renal/liver function, history of stroke, history of bleeding, INR (left out due to missing data), age>65 years, drug consumption with antiplatelet agents/non-steroidal inflammatory drugs, alcohol abuse.

For peer review only

**Online Table 3: Baseline characteristics of the non-matched population, patients not initiated on OAC therapy**

|                                                        | AF with a secondary precipitant<br>N=29,403 |                               |                                    |                   |                       |                          | AF without a<br>secondary<br>precipitant<br>N=60,361 |
|--------------------------------------------------------|---------------------------------------------|-------------------------------|------------------------------------|-------------------|-----------------------|--------------------------|------------------------------------------------------|
|                                                        | Alcohol<br>intoxication<br>N=302            | Thyro-<br>toxicosis<br>N=1408 | Myocardial<br>infarction<br>N=3508 | Surgery<br>N=4101 | Infection<br>N=16,079 | >1 precipitant<br>N=4005 |                                                      |
| <b>Demographics</b>                                    |                                             |                               |                                    |                   |                       |                          |                                                      |
| Age, median (IQR*)                                     | 58 (48-66)                                  | 74 (62-82)                    | 78 (69-84)                         | 76 (67-82)        | 80 (72-87)            | 76 (68-83)               | 69 (58-80)                                           |
| Male, n (%)                                            | 248 (82.1)                                  | 263 (18.7)                    | 1907 (54.4)                        | 2069 (50.5)       | 7352 (45.7)           | 2073 (51.8)              | 31,074 (51.5)                                        |
| <b>Comorbidities, n (%)</b>                            |                                             |                               |                                    |                   |                       |                          |                                                      |
| Cancer                                                 | 15 (5.0)                                    | 174 (12.4)                    | 454 (12.9)                         | 1115 (27.2)       | 3474 (21.6)           | 795 (19.9)               | 7915 (13.1)                                          |
| Chronic kidney disease                                 | 7 (2.3)                                     | 38 (2.7)                      | 236 (6.7)                          | 289 (7.0)         | 1223 (7.6)            | 375 (9.4)                | 1733 (2.9)                                           |
| COPD†                                                  | 26 (8.6)                                    | 128 (9.1)                     | 495 (14.1)                         | 539 (13.1)        | 3493 (21.7)           | 765 (19.1)               | 4544 (7.5)                                           |
| Diabetes                                               | 24 (7.9)                                    | 105 (7.5)                     | 417 (11.9)                         | 396 (9.7)         | 1473 (9.2)            | 387 (9.7)                | 3566 (5.9)                                           |
| Heart failure                                          | 18 (6.0)                                    | 209 (14.8)                    | 1218 (34.7)                        | 744 (18.1)        | 3752 (23.3)           | 1231 (30.7)              | 6328 (10.5)                                          |
| Hypertension                                           | 53 (17.5)                                   | 653 (46.4)                    | 2348 (66.9)                        | 1808 (44.1)       | 6942 (43.2)           | 1991 (49.7)              | 22,309 (37.0)                                        |
| IHD‡                                                   | 38 (12.6)                                   | 207 (14.7)                    | 3508 (100)                         | 1326 (32.3)       | 3558 (22.1)           | 2354 (58.8)              | 11,528 (19.1)                                        |
| PAD§                                                   | 6 (2.0)                                     | 49 (3.5)                      | 298 (8.5)                          | 371 (9.0)         | 1057 (6.6)            | 374 (9.3)                | 1913 (3.2)                                           |
| Prior bleeding event                                   | 74 (24.5)                                   | 157 (11.2)                    | 585 (16.7)                         | 1062 (25.9)       | 3420 (21.3)           | 998 (24.9)               | 7616 (12.6)                                          |
| Prior thromboembolic event                             | 22 (7.3)                                    | 78 (5.5)                      | 350 (10.0)                         | 422 (10.3)        | 2029 (12.6)           | 478 (11.9)               | 4301 (7.1)                                           |
| <b>Risk scores</b>                                     |                                             |                               |                                    |                   |                       |                          |                                                      |
| <b>CHA<sub>2</sub>DS<sub>2</sub>-VASC<sup>  </sup></b> |                                             |                               |                                    |                   |                       |                          |                                                      |
| Median (IQR*)                                          | 1 (0-2)                                     | 3 (2-4)                       | 4 (3-5)                            | 3 (2-4)           | 3 (2-4)               | 4 (2-5)                  | 2 (0-4)                                              |
| 0                                                      | 147 (48.7)                                  | 271 (19.2)                    | 0                                  | 317 (7.7)         | 1059 (6.6)            | 241 (6.0)                | 15,957 (26.4)                                        |
| 1-2                                                    | 102 (33.8)                                  | 270 (19.2)                    | 489 (13.9)                         | 1119 (27.3)       | 3671 (22.8)           | 824 (20.6)               | 17,513 (29.0)                                        |
| ≥3                                                     | 53 (17.5)                                   | 867 (61.6)                    | 3019 (86.1)                        | 2665 (65.0)       | 11,349 (70.6)         | 2940 (73.4)              | 26,891 (44.6)                                        |
| <b>HAS-BLED<sup>#</sup></b>                            |                                             |                               |                                    |                   |                       |                          |                                                      |
| Median (IQR*)                                          | 2 (1-3)                                     | 2 (1-3)                       | 3 (2-3)                            | 2 (1-3)           | 2 (1-3)               | 2 (2-3)                  | 2 (1-3)                                              |
| 0                                                      | 0                                           | 228 (16.2)                    | 102 (2.9)                          | 229 (5.6)         | 745 (4.6)             | 175 (4.4)                | 12,875 (21.3)                                        |
| 1-2                                                    | 211 (69.9)                                  | 756 (53.7)                    | 1424 (40.6)                        | 2265 (55.2)       | 8795 (54.7)           | 1924 (48.0)              | 31,914 (52.9)                                        |
| ≥3                                                     | 91 (30.1)                                   | 424 (30.1)                    | 1982 (56.5)                        | 1607 (39.2)       | 6539 (40.7)           | 1906 (47.6)              | 15,572 (25.8)                                        |

| Pharmacotherapy, n (%) |           |            |            |            |             |            |               |
|------------------------|-----------|------------|------------|------------|-------------|------------|---------------|
| Amiodarone             | ≤3        | 14 (1.0)   | 259 (7.4)  | 262 (6.4)  | 361 (2.2)   | 278 (6.9)  | 1133 (1.9)    |
| Digoxin                | 38 (12.6) | 398 (28.3) | 784 (22.3) | 782 (19.1) | 5210 (32.4) | 828 (20.7) | 10,336 (17.1) |
| Flecainide             | 0         | 8 (0.6)    | 8 (0.2)    | 10 (0.2)   | 30 (0.2)    | 5 (0.1)    | 786 (1.3)     |

\*IQR: interquartile range. †COPD: chronic obstructive pulmonary disease. ‡IHD: ischemic heart disease. §PAD: peripheral artery disease. ¶CHA<sub>2</sub>DS<sub>2</sub>-VASc: Risk score for stroke: congestive heart failure/LV function, hypertension, age 65-74 years, age>74 years (2 points), diabetes, stroke/TIA/systemic embolism (2 points), vascular disease, sex category (female); #HAS-BLED: Risk score for bleeding: hypertension, abnormal renal/liver function, history of stroke, history of bleeding, INR (left out due to missing data), age>65 years, drug consumption with antiplatelet agents/non-steroidal inflammatory drugs, alcohol abuse.

For peer review only

**Online Figure 1: Adjusted Hazard ratios of long-term outcomes in patients with AF with and without a secondary precipitant.**

**Adjustments: age groups, peripheral artery disease, heart failure, hypertension, prior thromboembolic event, ischemic heart disease, chronic kidney disease, diabetes, prior bleeding event, cancer, antiarrhythmic therapy (amiodarone, digoxin, flecainide) at the index date and OAC therapy status as a time-dependent variable.**

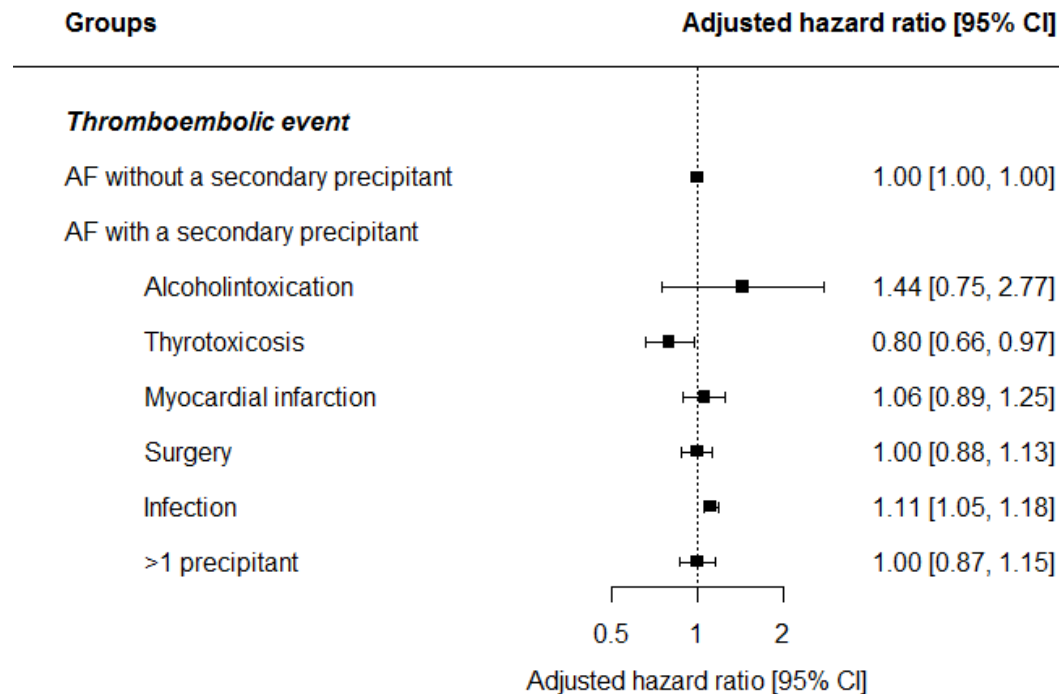

## STROBE Statement—checklist of items that should be included in reports of observational studies

|                              | Item No | Recommendation                                                                                                                                                                                                                                                                                                                                                                                                                                                                                                                                                                                                                                                                                                                     |
|------------------------------|---------|------------------------------------------------------------------------------------------------------------------------------------------------------------------------------------------------------------------------------------------------------------------------------------------------------------------------------------------------------------------------------------------------------------------------------------------------------------------------------------------------------------------------------------------------------------------------------------------------------------------------------------------------------------------------------------------------------------------------------------|
| <b>Title and abstract</b>    | 1       | (a) Indicate the study's design with a commonly used term in the title or the abstract<br>YES, p.1 and 3.<br><br>(b) Provide in the abstract an informative and balanced summary of what was done and what was found<br>YES, p. 3.                                                                                                                                                                                                                                                                                                                                                                                                                                                                                                 |
| <b>Introduction</b>          |         |                                                                                                                                                                                                                                                                                                                                                                                                                                                                                                                                                                                                                                                                                                                                    |
| Background/rationale         | 2       | Explain the scientific background and rationale for the investigation being reported<br>YES, p. 5                                                                                                                                                                                                                                                                                                                                                                                                                                                                                                                                                                                                                                  |
| Objectives                   | 3       | State specific objectives, including any prespecified hypotheses<br>YES, p. 5                                                                                                                                                                                                                                                                                                                                                                                                                                                                                                                                                                                                                                                      |
| <b>Methods</b>               |         |                                                                                                                                                                                                                                                                                                                                                                                                                                                                                                                                                                                                                                                                                                                                    |
| Study design                 | 4       | Present key elements of study design early in the paper<br>YES, p. 5-7.                                                                                                                                                                                                                                                                                                                                                                                                                                                                                                                                                                                                                                                            |
| Setting                      | 5       | Describe the setting, locations, and relevant dates, including periods of recruitment, exposure, follow-up, and data collection<br>YES, p. 5-7.                                                                                                                                                                                                                                                                                                                                                                                                                                                                                                                                                                                    |
| Participants                 | 6       | (a) <i>Cohort study</i> —Give the eligibility criteria, and the sources and methods of selection of participants. Describe methods of follow-up<br>YES, p. 6-7.<br><i>Case-control study</i> —Give the eligibility criteria, and the sources and methods of case ascertainment and control selection. Give the rationale for the choice of cases and controls<br><i>Cross-sectional study</i> —Give the eligibility criteria, and the sources and methods of selection of participants<br><br>(b) <i>Cohort study</i> —For matched studies, give matching criteria and number of exposed and unexposed<br>YES, p. 8.<br><i>Case-control study</i> —For matched studies, give matching criteria and the number of controls per case |
| Variables                    | 7       | Clearly define all outcomes, exposures, predictors, potential confounders, and effect modifiers. Give diagnostic criteria, if applicable<br>YES, p. 7-8. Figure 3. Specification of diagnosis can be found in the Online Table 1.                                                                                                                                                                                                                                                                                                                                                                                                                                                                                                  |
| Data sources/<br>measurement | 8*      | For each variable of interest, give sources of data and details of methods of assessment (measurement). Describe comparability of assessment methods if there is more than one group<br>YES, p. 5-6 and eTable 1.                                                                                                                                                                                                                                                                                                                                                                                                                                                                                                                  |
| Bias                         | 9       | Describe any efforts to address potential sources of bias<br>YES, p. 8.                                                                                                                                                                                                                                                                                                                                                                                                                                                                                                                                                                                                                                                            |
| Study size                   | 10      | Explain how the study size was arrived at<br>YES, p. 6-7, figure 1.                                                                                                                                                                                                                                                                                                                                                                                                                                                                                                                                                                                                                                                                |
| Quantitative variables       | 11      | Explain how quantitative variables were handled in the analyses. If applicable, describe which groupings were chosen and why                                                                                                                                                                                                                                                                                                                                                                                                                                                                                                                                                                                                       |

1  
2  
3  
4  
5  
6  
7  
8  
9  
10  
11  
12  
13  
14  
15  
16  
17  
18  
19  
20  
21  
22  
23  
24  
25  
26  
27  
28  
29  
30  
31  
32  
33  
34  
35  
36  
37  
38  
39  
40  
41  
42  
43  
44  
45  
46  
47  
48  
49  
50  
51  
52  
53  
54  
55  
56  
57  
58  
59  
60

YES, p. 6-7.

Statistical methods

12

(a) Describe all statistical methods, including those used to control for confounding

YES, p. 7-8.

(b) Describe any methods used to examine subgroups and interactions

YES, p. 7-8.

(c) Explain how missing data were addressed

No missing data

(d) *Cohort study*—If applicable, explain how loss to follow-up was addressed

No loss to follow-up.

*Case-control study*—If applicable, explain how matching of cases and controls was addressed

*Cross-sectional study*—If applicable, describe analytical methods taking account of sampling strategy

(e) Describe any sensitivity analyses

YES, p. 7.

Continued on next page



1  
2  
3  
4  
5  
6  
7  
8  
9  
10  
11  
12  
13  
14  
15  
16  
17  
18  
19  
20  
21  
22  
23  
24  
25  
26  
27  
28  
29  
30  
31  
32  
33  
34  
35  
36  
37  
38  
39  
40  
41  
42  
43  
44  
45  
46  
47  
48  
49  
50  
51  
52  
53  
54  
55  
56  
57  
58  
59  
60

## Results

|                          |     |                                                                                                                                                                                                                                |
|--------------------------|-----|--------------------------------------------------------------------------------------------------------------------------------------------------------------------------------------------------------------------------------|
| Participants             | 13* | (a) Report numbers of individuals at each stage of study—eg numbers potentially eligible, examined for eligibility, confirmed eligible, included in the study, completing follow-up, and analysed<br>YES, p. 8-9 and Figure 1. |
|                          |     | (b) Give reasons for non-participation at each stage<br>YES, p. 8-9 and Figure 1.                                                                                                                                              |
|                          |     | (c) Consider use of a flow diagram<br>YES, Figure 1                                                                                                                                                                            |
| Descriptive data         | 14* | (a) Give characteristics of study participants (eg demographic, clinical, social) and information on exposures and potential confounders<br>YES, p. 9, Table 1.                                                                |
|                          |     | (b) Indicate number of participants with missing data for each variable of interest<br>No missing data                                                                                                                         |
|                          |     | (c) <i>Cohort study</i> —Summarise follow-up time (eg, average and total amount)<br>YES, Figure 2.                                                                                                                             |
| Outcome data             | 15* | <i>Cohort study</i> —Report numbers of outcome events or summary measures over time<br>YES, p. 10 and Figure 2, 3.                                                                                                             |
|                          |     | <i>Case-control study</i> —Report numbers in each exposure category, or summary measures of exposure                                                                                                                           |
|                          |     | <i>Cross-sectional study</i> —Report numbers of outcome events or summary measures                                                                                                                                             |
| Main results             | 16  | (a) Give unadjusted estimates and, if applicable, confounder-adjusted estimates and their precision (eg, 95% confidence interval). Make clear which confounders were adjusted for and why they were included<br>YES, Figure 3. |
|                          |     | (b) Report category boundaries when continuous variables were categorized<br>Continuous variables were not categorized.                                                                                                        |
|                          |     | (c) If relevant, consider translating estimates of relative risk into absolute risk for a meaningful time period                                                                                                               |
| Other analyses           | 17  | Report other analyses done—eg analyses of subgroups and interactions, and sensitivity analyses<br>YES, p. 11.                                                                                                                  |
| <b>Discussion</b>        |     |                                                                                                                                                                                                                                |
| Key results              | 18  | Summarise key results with reference to study objectives<br>YES, p. 11.                                                                                                                                                        |
| Limitations              | 19  | Discuss limitations of the study, taking into account sources of potential bias or imprecision. Discuss both direction and magnitude of any potential bias<br>YES, p. 13-14.                                                   |
| Interpretation           | 20  | Give a cautious overall interpretation of results considering objectives, limitations, multiplicity of analyses, results from similar studies, and other relevant evidence<br>YES, p. 12-13.                                   |
| Generalisability         | 21  | Discuss the generalisability (external validity) of the study results<br>YES, p. 14.                                                                                                                                           |
| <b>Other information</b> |     |                                                                                                                                                                                                                                |
| Funding                  | 22  | Give the source of funding and the role of the funders for the present study and, if applicable, for the original study on which the present article is based                                                                  |

1  
2 YES, p. 14.  
3

4 \*Give information separately for cases and controls in case-control studies and, if applicable, for exposed and  
5 unexposed groups in cohort and cross-sectional studies.  
6  
7

8 **Note:** An Explanation and Elaboration article discusses each checklist item and gives methodological background and  
9 published examples of transparent reporting. The STROBE checklist is best used in conjunction with this article (freely  
10 available on the Web sites of PLoS Medicine at <http://www.plosmedicine.org/>, Annals of Internal Medicine at  
11 <http://www.annals.org/>, and Epidemiology at <http://www.epidem.com/>). Information on the STROBE Initiative is  
12 available at [www.strobe-statement.org](http://www.strobe-statement.org).  
13  
14  
15  
16  
17  
18  
19  
20  
21  
22  
23  
24  
25  
26  
27  
28  
29  
30  
31  
32  
33  
34  
35  
36  
37  
38  
39  
40  
41  
42  
43  
44  
45  
46  
47  
48  
49  
50  
51  
52  
53  
54  
55  
56  
57  
58  
59  
60
